# Supplementary material for: Urbanisation and wing asymmetry in the western honey bee (Apis mellifera, Linnaeus 1758) at multiple scales
Source: PeerJ. 2018 Dec 3;6:e5940. doi: 10.7717/peerj.5940 (PMC6282947; doi:10.7717/peerj.5940)
Supplement: Supplemental Information 4 [file peerj-06-5940-s004.xlsx]

## Sheet: GIS_Landscape_Data
Data collcted using 500 m buffer
Hive_ID	MEAN_Area_ha	SUM_Dwelling	SUM_Person	SUM_Commercial	SUM_Education	SUM_Hospital_Medical	SUM_Industrial	SUM_Residential	SUM_Transport	SUM_ArterialRoad	SUM_DistributorRoad	SUM_LocalRoad	SUM_Motorway	SUM_Path	SUM_PrimaryRoad	SUM_UrbanServiceLane	SUM_Dry_Sclerophyll_Forests__shrub_grass_subformation_	SUM_Dry_Sclerophyll_Forests__shrubby_subformation_	SUM_Forested_Wetlands	SUM_Grassy_Woodlands	SUM_Heathlands	SUM_Rainforests	SUM_Saline_Wetlands	SUM_Wet_Sclerophyll_Forests__grassy_subformation_	SUM_Wet_Sclerophyll_Forests__shrubby_subformation_
1	78.5191	2332	5138	0.42576	0.739146	0	0	42.9122	0	1549.39	431.023	6744.9	0	2696.83	0	0	0	0	0	0	0	0	0	0	0
3	78.5191	1188	3134	1.9682	3.06197	0	0	48.194	0	0	994.035	5687.52	1990.4	1192.91	0	0	0	20.9115	0	0	0	0	0	0	0
7	78.5191	1887	4581	0	0	0	0	74.7884	0	1629.87	1100.52	6062.36	0	0	0	0	0	3.77556	0	0	0	0	0	0	0.730612
9	78.5191	958	2818	0	13.0275	0	0	56.7639	0	265.54	1110.72	6711.32	0	613.218	0	0	0	0	0	0	0	0	0	0	0
10	78.5191	599	1693	0	0	0	43.9476	24.3224	0	3348.7	613.722	3252.8	0	635.372	0	163.718	0	0	0	0	1.81296	0	0	0	0
11	78.5191	1824	4281	0	2.27217	0	0	61.7959	0	101.937	1605.38	7380.57	0	454.8	0	0	0	0	0	0	0	0	0	0	0
13	78.5191	1896	3834	2.11779	0.00168516	0	0	35.6804	1.76417	2341.75	3414.97	8553.29	0	690.955	0	3014.97	0	0	0	0	0	0	0	0	0
16	78.5191	1242	2733	0	3.27713	0	33.2727	39.6871	1.20979	1214.84	893.936	5534.91	0	180.84	1910.18	1000.94	0	0	0	0	0	0	0	0	0
17	78.5191	310	802	0	0	0	4.58348	18.6766	0	0	11.6371	3058.94	0	400.449	1961.36	0	7.69932	29.8707	0	0	6.11685	0	0	0	0
18	78.5191	1141	3462	0	0	0	0	63.8427	0	0	2295.72	7354.19	0	143.542	0	0	0	10.7173	0	0	0	0	0	0	0
19	78.5191	2018	5664	7.91146	0	0	3.91702	66.6036	0.0869917	0	3854.51	7075.51	0	406.8	0	513.215	0	0	0	0	0	0	0	0	0
21	78.5191	1289	3402	0	10.9625	0	0	52.8011	0	0	1290.27	8006.89	0	1483.74	0	0	0	4.88177	0	0.373334	0	0	1.85686	0.933341	2.88003
22	78.5191	1015	2602	0	11.5715	0	11.6523	40.1365	0	0	1687.04	6065.19	0	420.891	1984.93	0	0	4.12897	0	0	0	0	0	0	0
23	78.5191	2501	5891	0	2.66124	0	0	63.3989	0	1011.4	1134.05	13224.4	0	221.25	0	194.763	0	0	0	0	0	0	0	0	0
26	78.5191	1520	3297	0	1.46811	0	0	55.6449	0	0	1583.33	5606.62	0	311.811	0	0	0	0.677995	0	0	0.229624	0.88673	0	0	0
27	78.5191	795	2228	0	2.03336	0	0	47.6845	3.7468	2380.22	0	4884.41	0	455.35	0	0	0	27.1251	0.52282	0	0	0	3.27919	0	0
28	78.5191	1471	4206	0	2.55313	0	0	72.6171	0	0	1358.55	8538.82	0	210.914	0	0	0	9.66905	0	0	0	0	0	0	0
30	78.5191	866	2793	0	0	0	0	58.7249	4.58681	2049.67	1811.14	6068.75	0	1760.2	0	0	0	10.2247	0	0.744959	0	0	0	3.13586	0
31	78.5191	890	2649	0	1.08853	0	0	54.0504	0	0	0	7150.51	0	144.732	0	0	0	10.7858	0	0	0	0	1.99106	0	0
32	78.5191	1038	2151	14.9276	0.842072	0	6.55377	43.9433	0	5549.67	2074.09	11507.7	0	219.917	0	0	0	0	0	0	0	1.183	0	0	0
33	78.5191	1305	3452	0	0	0.764107	19.6874	51.5509	0	2000.36	1137.63	7120.42	0	271.303	0	115.692	0	0	0	0	0	0	0	0	0
34	78.5191	2008	5281	8.80905	33.3523	0.015591	0	27.8917	0	442.684	2488.55	18357.2	0	5193.43	4015.89	4645.42	0	0	0	0	0	0	0	0	0
Data collected using 3km buffer
PersonID	MEAN_Area_ha	SUM_Dwelling	SUM_Person	SUM_Commercial	SUM_Education	SUM_Hospital_Medical	SUM_Industrial	SUM_Residential	SUM_Transport	SUM_ArterialRoad	SUM_DistributorRoad	SUM_LocalRoad	SUM_Motorway	SUM_Path	SUM_PrimaryRoad	SUM_UrbanServiceLane	SUM_Dry_Sclerophyll_Forests__shrub_grass_subformation_	SUM_Dry_Sclerophyll_Forests__shrubby_subformation_	SUM_Forested_Wetlands	SUM_Grassy_Woodlands	SUM_Heathlands	SUM_Rainforests	SUM_Saline_Wetlands	SUM_Wet_Sclerophyll_Forests__grassy_subformation_	SUM_Wet_Sclerophyll_Forests__shrubby_subformation_
1	2827.31	59587	148577	100.354	92.952	20.4027	0	1334.19	2.36848	30474	40478	188033	0	24714.7	0	21346.6	0	0	0.248815	0	8.39743	0	0	0	0
3	2827.31	50799	137054	83.3523	55.3081	6.18739	138.875	2162.72	31.2561	36632.4	29938	267300	12220.2	35588	6873.14	15907.2	0	50.769	8.46127	0	0	0	0.871	0	0
8	2827.31	1707	4696	0	3.32059	0	0	156.46	0	9574.56	0	42128.7	0	115.435	0	0	0	297.468	0.766449	241.396	0.560314	4.873	0	103.622	0.933829
10	2827.31	21384	53602	19.0409	38.6237	0	571.882	903.036	69.4493	38190.5	15611.2	154740	0	19669.6	0	5196.23	0	0.497628	4.67168	0	70.672	0	0.0397399	0	0
11	2827.31	65218	133497	45.6206	55.3851	3.70228	0	1454.18	7.13549	33069.8	64268.7	230537	213.437	29720.7	0	23679.9	0	16.3237	0	0	10.8893	0	0	0	0
12	2827.31	121646	254031	556.658	155.996	10.6769	165.876	1335.42	44.1127	80087.5	73107.7	346697	26385.4	55534.1	11503.3	81127.8	0	0	0.248815	0	6.03372	0	0	0	0
14	2827.31	113440	231790	296.616	85.4903	9.9575	2.49629	1688.43	19.1909	64949.2	82907.3	335844	16254.1	43294.7	0	55440.4	0	11.6316	0.248815	0	6.03372	0	0	0	0
18	2827.31	11780	34773	26.6668	49.0796	0	0	780.381	0	10227.5	18216.2	105587	0	16062.5	8936.69	0	256.971	1526.88	78.5726	0.995725	42.2576	0	1.3691	0.911484	0.57431
19	2827.31	50549	143693	85.8554	58.645	5.73123	243.435	2144.66	75.0503	41530.8	33790.2	254966	6851.16	26736.1	1586.46	9685.64	0.995549	0	0.497764	0	0	0	1.49333	1.24459	0
21	2827.31	43825	121061	57.2462	65.0353	4.51589	82.6563	1915.9	10.6588	17058.4	31644.9	224882	0	16300.8	2524.73	8373.4	0	195.766	0.186673	1.55559	0	0	64.8769	2.05333	13.1288
22	2827.31	41147	104935	71.4329	94.162	2.75271	83.9224	2088.89	0	25045.4	41463.4	235254	0	12705.5	13763.7	94.7076	5.18627	324.615	2.18242	2.24003	0	4.32508	29.0354	0.124446	0.559993
24	2827.31	10621	26721	11.6246	45.5537	2.87315	194.593	967.68	0	2179.63	16177.7	102678	0	10391.5	27780.2	0	0	98.9718	10.6715	42.6482	14.8713	239.842	0	87.4699	703.921
25	2827.31	36754	71716	79.3102	23.2568	0.821692	0.706138	960.058	25.6094	14848.2	34388.2	137589	9403.79	31421.2	8308.25	1252.73	0	98.1672	0	0	18.4109	0	0.124402	0	0
26	2827.31	18019	40111	8.06312	30.8563	0	7.19249	955.069	0	5133.61	26470.9	93519.7	0	16394.3	0	160.539	13.8574	114.425	2.67544	0	93.3171	16.9888	33.0374	0	0
29	2827.31	33633	87999	39.631	73.4707	0	77.8858	1791.85	0.184645	13200.4	30845.9	208162	0	10611.8	12299.7	94.7076	0	465.867	1.55569	1.74225	0	0	99.3717	0.124446	1.6179
30	2827.31	12812	39387	32.0529	43.5086	0	0	937.707	22.2702	22051.4	14660.7	123476	0	17681.8	0	0	0	1637.68	73.9745	4.79181	0	0	10.8726	48.6021	2.36478
31	2827.31	35801	95756	44.6276	45.5749	0.538028	14.1613	1740.53	7.08566	16993.7	20601.3	196161	0	17052.1	14492.6	8273.91	0	120.15	3.29757	1.12	0.0622173	0	39.7498	2.05333	11.3243
33	2827.31	38762	103269	45.8881	74.7585	4.01384	155.734	1894.06	8.91242	32416.7	35840.9	229536	8191.13	20564	0	4987.78	0.0622268	187.09	1.18229	4.97801	0	0.248907	101.598	4.16904	13.0675
6	2827.31	1054	2438	0	0	0	0	807.327	0	0	0	35972.8	0	486.165	0	0	0	0	0	0	0	0	0	0	0
15	2827.31	11870	28518	31.4541	34.5512	2.28459	194.863	1220.34	0	18210.3	13010.1	134484	0	18241.7	0	4189.06	0	0	0	0	0	0	0	0	0
20	2827.31	81	159	0	0	0	0	0	0	0	0	5647.67	0	0	0	0	0	0	0	0	0	0	0	0	0
34	2827.31	123553	250602	487.341	139.716	13.4207	138.791	1546.27	116.575	78962.9	65703.2	385520	24025.4	59950.4	20919.1	93054.8	0	0	0	0	0	0	0	0	0

## Sheet: Procrustes_Coordinates
Hive number	Wing side (l- left wing, r = right wing)	Replicate number	Id	ProcCoord1	ProcCoord2	ProcCoord3	ProcCoord4	ProcCoord5	ProcCoord6	ProcCoord7	ProcCoord8	ProcCoord9	ProcCoord10	ProcCoord11	ProcCoord12	ProcCoord13	ProcCoord14	ProcCoord15	ProcCoord16	ProcCoord17	ProcCoord18	ProcCoord19	ProcCoord20	ProcCoord21	ProcCoord22	ProcCoord23	ProcCoord24	ProcCoord25	ProcCoord26	ProcCoord27	ProcCoord28	ProcCoord29	ProcCoord30	ProcCoord31	ProcCoord32	ProcCoord33	ProcCoord34	ProcCoord35	ProcCoord36	ProcCoord37	ProcCoord38
1	l	1	wls01rep1	0.279492	-0.0591558	0.244841	-0.0621187	0.186321	0.0700869	0.183435	-0.0259607	0.147396	-0.157459	0.0689966	0.08075	-0.00852711	0.121828	0.0151361	0.0965447	-0.0462903	0.0417873	0.000470019	0.0083847	-0.0679236	-0.0431695	-0.0766315	-0.109722	-0.107401	-0.162656	-0.113967	0.1151	-0.175843	0.0680007	-0.295247	0.00708251	-0.351053	0.00240817	-0.358846	-0.0491599	0.475643	0.0574293
1	l	2	wls01rep1	0.288386	-0.0624625	0.253694	-0.0596019	0.189676	0.0672512	0.172922	-0.0154055	0.156772	-0.147993	0.0638511	0.0787897	-0.0112433	0.124062	0.0104467	0.0934235	-0.0518156	0.0427924	-0.0101832	0.00944758	-0.0719531	-0.0375583	-0.0810573	-0.104635	-0.106076	-0.152936	-0.114892	0.108589	-0.178964	0.0582053	-0.285725	0.00622571	-0.349574	-0.00172295	-0.357787	-0.0486125	0.483523	0.0421414
1	l	3	wls01rep2	0.277267	-0.0611857	0.246869	-0.0608341	0.184267	0.0692957	0.179427	-0.0216074	0.150848	-0.150682	0.072558	0.0756783	-0.0109184	0.129398	0.01681	0.0931204	-0.0441272	0.0405986	0.000902909	0.00683885	-0.0689231	-0.037421	-0.0760026	-0.107244	-0.102479	-0.156617	-0.114995	0.110498	-0.173759	0.0616177	-0.292125	0.00384666	-0.355083	0.000908836	-0.368183	-0.0475543	0.477647	0.0513453
1	l	4	wls01rep2	0.27938	-0.0586951	0.246975	-0.0601752	0.185833	0.0676927	0.179339	-0.023034	0.152995	-0.152239	0.0706669	0.0778355	-0.00925367	0.129151	0.0127482	0.0914814	-0.0439686	0.042344	-0.000768935	0.00885435	-0.0686865	-0.0375812	-0.077473	-0.107246	-0.103808	-0.156657	-0.115244	0.108242	-0.171823	0.0609952	-0.291724	0.00498165	-0.356663	0.000130899	-0.365718	-0.0467178	0.477193	0.0506366
1	l	5	wls01rep3	0.278166	-0.0576934	0.249613	-0.0625077	0.187089	0.0714007	0.180508	-0.0183795	0.148511	-0.152382	0.0729381	0.076222	-0.0121645	0.124697	0.0143604	0.0927646	-0.0383759	0.0398271	-0.00279646	0.00648444	-0.0691522	-0.0387723	-0.0832015	-0.105152	-0.102239	-0.155928	-0.111047	0.108603	-0.171412	0.0661184	-0.297801	0.00427801	-0.354335	-0.00173551	-0.365286	-0.0482133	0.476626	0.0503676
1	l	6	wls01rep3	0.276739	-0.057364	0.246326	-0.0619506	0.19045	0.0691902	0.18218	-0.0204928	0.149349	-0.149084	0.0711962	0.0783127	-0.0123305	0.126473	0.0137344	0.090895	-0.0384642	0.0414014	-0.00095482	0.00776844	-0.0694615	-0.0392069	-0.0816263	-0.106014	-0.102436	-0.156637	-0.11347	0.108668	-0.170263	0.0654517	-0.296522	0.00511546	-0.354967	-0.000714836	-0.366429	-0.0509224	0.47695	0.0491102
1	l	7	wls01rep4	0.278954	-0.0569053	0.250401	-0.0617196	0.187877	0.0721888	0.181296	-0.0175915	0.149299	-0.151594	0.0737262	0.0770101	-0.0113764	0.125485	0.0151485	0.0935527	-0.0375878	0.0406152	-0.00200837	0.00727252	-0.0683642	-0.0379842	-0.0824134	-0.104363	-0.101451	-0.15514	-0.110259	0.109391	-0.170624	0.0669065	-0.297013	0.00506609	-0.353547	-0.000947423	-0.364498	-0.0474252	0.477414	0.0511557
1	l	8	wls01rep4	0.27762	-0.0564832	0.247207	-0.0610698	0.191331	0.070071	0.18306	-0.0196119	0.150229	-0.148203	0.0720771	0.0791935	-0.0114496	0.127354	0.0146152	0.0917759	-0.0375834	0.0422823	-7.39797e-05	0.00864928	-0.0685807	-0.0383261	-0.0807455	-0.105133	-0.101555	-0.155756	-0.112589	0.109549	-0.169382	0.0663326	-0.295641	0.0059963	-0.354086	0.000166004	-0.365548	-0.0500416	0.477831	0.049991
1	l	9	wls01rep5	0.277513	-0.0575263	0.243388	-0.0641382	0.192811	0.06758	0.182274	-0.0228729	0.153498	-0.155937	0.075287	0.0777947	-0.0128692	0.128373	0.0152507	0.0956958	-0.0493595	0.0431556	0.000626808	0.00413922	-0.0732272	-0.0368956	-0.0811321	-0.104736	-0.101622	-0.158463	-0.116726	0.110757	-0.17428	0.0645064	-0.296376	0.00427994	-0.351262	-7.45018e-05	-0.359135	-0.0486343	0.47534	0.0529973
1	l	10	wls01rep5	0.279006	-0.0601755	0.241923	-0.0623334	0.191353	0.0693864	0.181916	-0.0251439	0.153882	-0.154501	0.0738307	0.0796069	-0.0124705	0.129816	0.0167525	0.0930585	-0.0489641	0.0446004	-0.000102023	2.50641e-05	-0.0709835	-0.0358228	-0.0833441	-0.106619	-0.102715	-0.154789	-0.117074	0.1085	-0.176109	0.0644788	-0.295981	0.00573731	-0.349388	-0.000840573	-0.359116	-0.0490257	0.477584	0.0540421
3	l	1	wls03rep1	0.279579	-0.0586013	0.25487	-0.0597336	0.189194	0.0653524	0.173027	-0.0127218	0.158939	-0.151473	0.0744763	0.0769224	-0.00919415	0.124269	0.00950569	0.0925816	-0.0456045	0.0385965	-0.0109802	0.01153	-0.0727132	-0.0374747	-0.0825681	-0.101627	-0.111144	-0.154813	-0.11582	0.107978	-0.177885	0.0571513	-0.287207	0.00554564	-0.350712	-0.00167558	-0.359056	-0.0472604	0.483293	0.0454528
3	l	2	wls03rep1	0.280153	-0.0595959	0.253493	-0.0603293	0.190002	0.0670098	0.172876	-0.0150524	0.15721	-0.150422	0.0766027	0.0785935	-0.0095099	0.124892	0.00953615	0.0948356	-0.0441455	0.0403994	-0.0119377	0.0097937	-0.0752407	-0.0352814	-0.083819	-0.101881	-0.109348	-0.157754	-0.118852	0.107311	-0.177002	0.0593865	-0.285487	0.00565138	-0.347479	-0.00177828	-0.360322	-0.0505377	0.48327	0.0447596
3	l	3	wls03rep2	0.283367	-0.0612832	0.252703	-0.0606362	0.180395	0.071917	0.18106	-0.0167577	0.162083	-0.153282	0.0714296	0.0754997	-0.00866202	0.124995	0.0128152	0.0897048	-0.0515585	0.0396731	-0.00863972	0.00566248	-0.0707843	-0.0429107	-0.0802286	-0.106375	-0.106565	-0.158596	-0.129621	0.107994	-0.185463	0.0619488	-0.286816	0.0100329	-0.337848	0.00532505	-0.359332	-0.04214	0.481667	0.0492273
3	l	4	wls03rep2	0.285578	-0.0604393	0.254903	-0.0597495	0.179744	0.0678152	0.17961	-0.0149783	0.163733	-0.154146	0.0692891	0.0737815	-0.00892201	0.123018	0.0110613	0.0899152	-0.0534057	0.0399543	-0.0101299	0.00771372	-0.0701339	-0.0393376	-0.0800585	-0.104654	-0.106478	-0.156859	-0.12956	0.10802	-0.186265	0.0583504	-0.286951	0.0102401	-0.338397	0.00375878	-0.357335	-0.0403982	0.483717	0.0479955
3	l	5	wls03rep3	0.282579	-0.0620713	0.251915	-0.0614243	0.179607	0.0711289	0.180272	-0.0175458	0.161295	-0.15407	0.0706415	0.0747116	-0.0094501	0.124207	0.0120271	0.0889167	-0.0523466	0.038885	-0.00942781	0.00487439	-0.0715724	-0.0436988	-0.0810166	-0.107163	-0.107353	-0.159384	-0.130409	0.107206	-0.186251	0.0611607	-0.287604	0.00924482	-0.338637	0.00453696	-0.360121	-0.0429281	0.480879	0.0484392
3	l	6	wls03rep4	0.28	-0.0600104	0.248536	-0.0596389	0.183697	0.069245	0.173063	-0.0127848	0.158979	-0.149967	0.0736134	0.0779583	0.00224932	0.127986	0.0219293	0.0939269	-0.0476083	0.0436316	-0.00217414	0.00808633	-0.0737689	-0.0437929	-0.0818057	-0.105772	-0.112826	-0.159205	-0.11343	0.107773	-0.171562	0.0597059	-0.291501	0.00667579	-0.350134	-0.00239984	-0.371093	-0.0497256	0.473837	0.0483074
3	l	7	wls03rep4	0.280102	-0.0603852	0.246812	-0.0597923	0.183727	0.0688463	0.171306	-0.0129654	0.159339	-0.148587	0.0702143	0.0798042	0.00222563	0.127514	0.0198668	0.0918719	-0.0455432	0.0447115	-0.00373092	0.00965218	-0.0714332	-0.0409156	-0.0835584	-0.106081	-0.112973	-0.161593	-0.111404	0.108832	-0.17158	0.0591455	-0.291748	0.00423157	-0.348093	-0.00146318	-0.371092	-0.0503921	0.477563	0.0475653
3	l	8	wls03rep5	0.285587	-0.0604084	0.254638	-0.063046	0.17542	0.0649171	0.177037	-0.0167175	0.164899	-0.147347	0.073271	0.0709421	-0.0116081	0.124974	0.010279	0.0886276	-0.054931	0.0446326	-0.00483436	0.00791536	-0.0697677	-0.0418148	-0.078214	-0.105519	-0.10695	-0.154085	-0.106421	0.110058	-0.170093	0.0580896	-0.294184	0.00608616	-0.345855	0.00360086	-0.374091	-0.0432158	0.475819	0.0523095
3	l	9	wls03rep5	0.286	-0.0611082	0.255409	-0.0620137	0.173547	0.0652083	0.175696	-0.0150255	0.167072	-0.147212	0.0727047	0.0707246	-0.0108093	0.124462	0.00767658	0.0889519	-0.0525296	0.0432604	-0.00571369	0.00738989	-0.0686594	-0.0413196	-0.078872	-0.104812	-0.107219	-0.151846	-0.105259	0.105436	-0.1682	0.0567281	-0.292316	0.00620135	-0.350464	0.0016473	-0.375075	-0.0388525	0.477012	0.0521795
5	l	10	wls03rep6	0.286616	-0.0625681	0.248796	-0.0625653	0.187646	0.0711763	0.179461	-0.0184343	0.156451	-0.151488	0.0631127	0.0808987	-0.00980549	0.127587	0.00825363	0.0948752	-0.0639821	0.0492194	-0.0076033	0.00713977	-0.0721773	-0.0403878	-0.0783188	-0.104447	-0.103878	-0.15283	-0.111692	0.108517	-0.176604	0.0630337	-0.294847	0.00341733	-0.338641	-0.00492393	-0.357552	-0.04905	0.484766	0.0408309
7	l	1	wls07rep1	0.279255	-0.0581305	0.243696	-0.0583463	0.191884	0.0653438	0.185819	-0.0173015	0.160507	-0.1431	0.0665576	0.07352	-0.00813102	0.120662	0.0139498	0.0879726	-0.0508721	0.0418065	-0.010208	0.0121455	-0.07007	-0.0401879	-0.0784428	-0.10297	-0.103863	-0.151085	-0.117458	0.106323	-0.173152	0.0583901	-0.290438	0.00297151	-0.354985	0.00221441	-0.366551	-0.0452684	0.482503	0.0450405
7	l	2	wls07rep1	0.279271	-0.0580424	0.245157	-0.0557287	0.191076	0.064059	0.186369	-0.019304	0.160613	-0.143112	0.0671957	0.0746818	-0.00824904	0.12047	0.0138597	0.0878038	-0.0516336	0.0403022	-0.00822532	0.0125229	-0.0700347	-0.0404205	-0.0803505	-0.103765	-0.104284	-0.149336	-0.116991	0.104031	-0.175759	0.0594937	-0.28826	0.00637603	-0.35568	0.000435972	-0.366481	-0.0457717	0.482405	0.0453043
7	l	3	wls07rep2	0.280628	-0.0574931	0.248191	-0.0610213	0.187601	0.0693931	0.178511	-0.0188626	0.155521	-0.146162	0.0622384	0.0809267	-0.00873558	0.126152	0.00738371	0.0946778	-0.0541283	0.0435657	-0.00300309	0.00948789	-0.0698357	-0.0409744	-0.0814948	-0.109382	-0.109599	-0.155837	-0.117179	0.10944	-0.175943	0.0638112	-0.288612	0.00563176	-0.346059	-0.00191431	-0.354967	-0.0511219	0.489481	0.0396817
7	l	4	wls07rep2	0.279016	-0.0589677	0.245357	-0.0594695	0.18908	0.0688484	0.178823	-0.0161866	0.156352	-0.147445	0.0607362	0.0810152	-0.0103148	0.128161	0.00581143	0.0967671	-0.0543934	0.04472	-0.0020433	0.00771311	-0.0665924	-0.0425645	-0.0795991	-0.105701	-0.108233	-0.157408	-0.122545	0.108939	-0.174865	0.0638184	-0.287084	0.00353154	-0.346661	-0.00213623	-0.35453	-0.0501294	0.491685	0.0364939
7	l	5	wls07rep3	0.280325	-0.0575668	0.247054	-0.0584155	0.184238	0.0704457	0.177345	-0.0133883	0.160411	-0.142966	0.0691651	0.0770044	-0.00257739	0.12152	0.021633	0.0898349	-0.0473148	0.0378423	-0.00558638	0.00950315	-0.0717455	-0.040704	-0.0824988	-0.104991	-0.109028	-0.158142	-0.111246	0.107013	-0.173344	0.0578326	-0.295377	0.00646137	-0.353013	-0.00054559	-0.367627	-0.0452861	0.479185	0.0445479
7	l	6	wls07rep3	0.280156	-0.0575813	0.245624	-0.0578115	0.186879	0.0697759	0.175751	-0.0130788	0.159346	-0.14269	0.0667134	0.0788792	-0.0021213	0.119559	0.0209367	0.0887339	-0.0457544	0.0369977	-0.00444385	0.0108618	-0.0711345	-0.0408735	-0.0821459	-0.10316	-0.11048	-0.156925	-0.11047	0.107918	-0.173625	0.0592525	-0.294896	0.00537369	-0.353762	-0.00111154	-0.36767	-0.0479264	0.481097	0.0438052
7	l	7	wls07rep4	0.287744	-0.0599827	0.248646	-0.0616476	0.187513	0.0645245	0.184582	-0.0178268	0.158783	-0.149309	0.0643351	0.0778069	-0.01175	0.119898	0.00869348	0.0932474	-0.0563166	0.0459794	-0.00242148	0.00755457	-0.0660683	-0.0391548	-0.0694301	-0.100997	-0.103206	-0.154586	-0.110157	0.111487	-0.174049	0.0614962	-0.299163	0.00556666	-0.352455	-0.000308431	-0.366591	-0.0474602	0.471311	0.0437112
7	l	8	wls07rep4	0.286795	-0.0603179	0.247697	-0.0619653	0.184951	0.0683211	0.18396	-0.0227614	0.159715	-0.150392	0.0672881	0.0759573	-0.00933443	0.119445	0.00973476	0.0922282	-0.0593837	0.0433204	-5.55684e-05	0.00709777	-0.0648353	-0.0368574	-0.0736755	-0.100923	-0.0992985	-0.151158	-0.110469	0.109964	-0.17494	0.0613648	-0.300633	0.00685405	-0.351202	0.00211544	-0.368334	-0.0494245	0.47202	0.0471322
7	l	9	wls07rep5	0.285622	-0.0633675	0.249585	-0.0610444	0.189052	0.0682153	0.178304	-0.0174672	0.156748	-0.151096	0.0596915	0.0831463	-0.010409	0.125879	0.00935435	0.095653	-0.0660305	0.0452284	-0.00836632	0.00775406	-0.0706789	-0.0394223	-0.0775534	-0.104533	-0.104168	-0.151997	-0.106948	0.113836	-0.174683	0.0615579	-0.298671	0.000866455	-0.33862	-0.00480064	-0.357417	-0.0488546	0.485188	0.0404461
7	l	10	wls07rep5	0.28606	-0.0597359	0.24735	-0.0613099	0.190526	0.0640807	0.182211	-0.0206782	0.15833	-0.148844	0.0659134	0.0782572	-0.00957025	0.121396	0.00611212	0.0956907	-0.0530793	0.0426332	0.000185756	0.00866873	-0.0656928	-0.0389787	-0.0717715	-0.104061	-0.0974181	-0.154292	-0.115232	0.109499	-0.182494	0.0613456	-0.298553	0.00479129	-0.35353	0.000416677	-0.364807	-0.0461357	0.470407	0.0422029
9	l	1	wls09rep1	0.283114	-0.0617059	0.248759	-0.0610942	0.182459	0.0679013	0.177863	-0.0193848	0.15945	-0.147797	0.0711844	0.0763609	-0.00580251	0.124919	0.0150007	0.0907122	-0.0527345	0.0427488	-0.00767826	0.0122058	-0.0707234	-0.0395404	-0.0764129	-0.106584	-0.105555	-0.154706	-0.119766	0.108445	-0.177135	0.0637341	-0.297615	0.00798726	-0.343287	0.0041747	-0.361647	-0.0545779	0.480526	0.046201
9	l	2	wls09rep2	0.27992	-0.0566455	0.249739	-0.0589467	0.18587	0.0660983	0.176298	-0.0193192	0.160543	-0.151042	0.0618075	0.076972	-0.00884991	0.123792	0.00993114	0.0884984	-0.0625216	0.0395648	-0.00266152	0.00679582	-0.0722124	-0.0403982	-0.0763197	-0.105972	-0.0993306	-0.150529	-0.112625	0.107379	-0.172082	0.0591347	-0.296073	0.00535908	-0.34726	0.00388191	-0.362261	-0.0421867	0.488088	0.0475638
9	l	3	wls09rep1	0.28251	-0.0619334	0.246029	-0.0614769	0.183258	0.0669488	0.17732	-0.0193981	0.1596	-0.14663	0.0708052	0.0765756	-0.00799984	0.122952	0.0167571	0.0912618	-0.0510857	0.0434207	-0.00914738	0.0113902	-0.0701873	-0.0400213	-0.0760087	-0.107068	-0.103576	-0.150682	-0.1199	0.10692	-0.176419	0.0634821	-0.297034	0.00795885	-0.34367	0.0030637	-0.364491	-0.0537687	0.48324	0.0470042
9	l	4	wls09rep3	0.284437	-0.0621817	0.258142	-0.0623856	0.18439	0.0674654	0.180059	-0.0191133	0.165259	-0.145429	0.0590723	0.0769263	-0.0103241	0.121388	0.00964768	0.0915439	-0.0561648	0.041124	-0.00634867	0.00832199	-0.0765078	-0.0369609	-0.0814377	-0.101995	-0.103766	-0.146478	-0.118051	0.106934	-0.174377	0.0557287	-0.29198	0.00292331	-0.34377	0.000538974	-0.362141	-0.0423613	0.48386	0.04401
9	l	5	wls09rep2	0.279019	-0.0589479	0.249169	-0.0579091	0.188524	0.0668117	0.176116	-0.0204074	0.162084	-0.149669	0.061012	0.0779371	-0.0100752	0.121361	0.00990678	0.0907045	-0.0638259	0.0424939	-0.00390364	0.00975437	-0.0696265	-0.0399624	-0.0744949	-0.106857	-0.0995723	-0.151924	-0.114364	0.106941	-0.171264	0.0569945	-0.295402	0.00853909	-0.347779	0.00237555	-0.362751	-0.0437334	0.487227	0.0454968
9	l	6	wls09rep4	0.281128	-0.0550719	0.243993	-0.0576664	0.195884	0.0645965	0.177494	-0.0165886	0.15584	-0.145478	0.0788781	0.0720242	-0.00986363	0.118199	0.0118048	0.0894108	-0.0505144	0.0421107	-0.00868767	0.00789926	-0.0664934	-0.0408364	-0.0728577	-0.102975	-0.105299	-0.142385	-0.122379	0.103802	-0.175769	0.0611178	-0.302112	0.00486873	-0.35479	-0.00123106	-0.359593	-0.0459615	0.483337	0.0441647
9	l	7	wls09rep3	0.283101	-0.0615998	0.257616	-0.0637536	0.186614	0.0682246	0.180232	-0.0190654	0.167498	-0.147828	0.0586481	0.0789787	-0.00848011	0.120899	0.00730417	0.0928408	-0.0577105	0.0405498	-0.00796724	0.00772981	-0.0747525	-0.0372555	-0.0813146	-0.0982814	-0.104063	-0.147443	-0.116721	0.105175	-0.172454	0.0554457	-0.292768	0.00397897	-0.345111	0.000262705	-0.362123	-0.0431778	0.482454	0.0443195
9	l	8	wls09rep5	0.277245	-0.0592329	0.24788	-0.0590567	0.181674	0.0653673	0.183182	-0.0222052	0.16462	-0.146346	0.0749171	0.0752943	-0.0043608	0.122573	0.0125799	0.0899369	-0.0493282	0.0384505	-0.0086557	0.0107269	-0.0687693	-0.0435613	-0.0816151	-0.108705	-0.103707	-0.154468	-0.112324	0.107219	-0.173221	0.0603314	-0.297419	0.00612356	-0.352309	0.00418839	-0.366997	-0.0407894	0.476608	0.0541535
9	l	9	wls09rep4	0.281412	-0.0539805	0.245886	-0.0594912	0.194745	0.0631225	0.177174	-0.0166543	0.155402	-0.145231	0.0788888	0.0718911	-0.0113608	0.115666	0.0119872	0.0893253	-0.0532257	0.0406797	-0.00977162	0.00890214	-0.064543	-0.038121	-0.0730619	-0.100439	-0.104834	-0.143897	-0.123646	0.101446	-0.175534	0.0634246	-0.302227	0.00416844	-0.353916	-0.000643785	-0.358766	-0.0452696	0.48539	0.0451015
9	l	10	wls09rep5	0.278572	-0.0590195	0.249815	-0.0609006	0.180655	0.0666288	0.184261	-0.0201497	0.163063	-0.145704	0.0747433	0.0744064	-0.00380563	0.119439	0.0141096	0.0915026	-0.047562	0.0401302	-0.0110633	0.0114944	-0.0676356	-0.0429123	-0.0803891	-0.10786	-0.106442	-0.154528	-0.113205	0.106841	-0.171323	0.0585354	-0.298393	0.00464347	-0.353625	0.00470427	-0.366956	-0.0409018	0.475181	0.0536501
10	l	1	wls10rep1	0.282967	-0.0623228	0.255558	-0.063435	0.190529	0.064837	0.184451	-0.0195173	0.164009	-0.148796	0.06517	0.0755841	-0.0130232	0.120623	0.00784962	0.0919088	-0.0524717	0.0433587	-0.00559712	0.00690513	-0.0709474	-0.039034	-0.0807482	-0.101019	-0.103038	-0.150135	-0.114909	0.107689	-0.178486	0.0614712	-0.307125	0.00557377	-0.345724	0.00259907	-0.353288	-0.0452155	0.474824	0.048924
10	l	2	wls10rep2	0.279228	-0.0597271	0.248578	-0.0646113	0.187737	0.0645294	0.178203	-0.0187887	0.162813	-0.149104	0.0638204	0.0749098	-0.00655849	0.120734	0.0150693	0.0903865	-0.052412	0.0410971	-0.00408965	0.00532056	-0.0694296	-0.0425506	-0.0764007	-0.104151	-0.0993593	-0.153229	-0.110964	0.108609	-0.174161	0.0621558	-0.303992	0.00701591	-0.349245	0.00324633	-0.365775	-0.0415804	0.476938	0.0557376
10	l	3	wls10rep1	0.282174	-0.0640704	0.256757	-0.0636322	0.188617	0.0674308	0.185304	-0.0212199	0.164512	-0.150749	0.0641983	0.0746656	-0.0120123	0.121481	0.0106151	0.092366	-0.0535057	0.0444148	-0.00455131	0.0092559	-0.0686713	-0.0386937	-0.080698	-0.102287	-0.101667	-0.153523	-0.117994	0.107552	-0.179484	0.0646378	-0.305288	0.00657076	-0.345758	0.00396415	-0.354021	-0.0474893	0.471473	0.0493254
10	l	4	wls10rep3	0.282991	-0.0608795	0.249043	-0.0650516	0.178218	0.0677316	0.171181	-0.0163722	0.160711	-0.148094	0.0648722	0.0772959	-0.00964826	0.123626	0.00982512	0.0929423	-0.0534414	0.0413236	-0.00138218	0.00576209	-0.0653739	-0.0383457	-0.0808321	-0.104526	-0.110148	-0.151972	-0.115384	0.109835	-0.177834	0.0636479	-0.291888	0.00667331	-0.348376	0.000321706	-0.354159	-0.0506453	0.491624	0.0467268
10	l	5	wls10rep2	0.279702	-0.0594718	0.249416	-0.0626339	0.190108	0.0660456	0.176812	-0.0183607	0.160947	-0.152276	0.0643814	0.0765531	-0.00680739	0.11869	0.0148796	0.0883802	-0.0507354	0.0386015	-0.00554302	0.00540928	-0.0683019	-0.0393877	-0.0772967	-0.102427	-0.100883	-0.155113	-0.110841	0.108148	-0.175736	0.0619304	-0.305116	0.00832199	-0.348945	0.00232885	-0.363254	-0.0411118	0.477213	0.0563735
10	l	6	wls10rep4	0.281596	-0.0607423	0.24341	-0.0623861	0.186547	0.0665894	0.183226	-0.023568	0.160499	-0.143822	0.0673273	0.0758594	-0.0022682	0.124172	0.0172111	0.0899056	-0.0604449	0.0433527	-0.00390039	0.00528192	-0.0749936	-0.0369382	-0.0818607	-0.107445	-0.103873	-0.150252	-0.11468	0.11123	-0.17818	0.0598891	-0.289697	0.00512828	-0.34972	-0.00150582	-0.36265	-0.0461714	0.482453	0.0514222
10	l	7	wls10rep3	0.282639	-0.0628047	0.249251	-0.0633635	0.18025	0.0690606	0.171154	-0.0165353	0.162253	-0.150263	0.0630789	0.0773303	-0.0114084	0.12362	0.00806019	0.092957	-0.0510025	0.0444323	-0.00131597	0.005554	-0.0668011	-0.0364619	-0.0804294	-0.102878	-0.109719	-0.150303	-0.117351	0.108008	-0.173791	0.0646412	-0.291928	0.00460106	-0.35019	-0.00148731	-0.353882	-0.0508883	0.491133	0.0447803
10	l	8	wls10rep5	0.281654	-0.0622017	0.245261	-0.0614452	0.195417	0.0636965	0.174929	-0.0162327	0.160681	-0.143807	0.0788018	0.075394	-0.00571296	0.125826	0.0120886	0.0947443	-0.0571207	0.045384	-0.0129068	0.012014	-0.0762161	-0.0367919	-0.086861	-0.107456	-0.105626	-0.155065	-0.113236	0.110391	-0.177944	0.0638349	-0.296076	0.00274776	-0.343303	-0.00167762	-0.355609	-0.0546325	0.481779	0.0452769
10	l	9	wls10rep4	0.27913	-0.0626131	0.245284	-0.0613468	0.188066	0.0659835	0.183242	-0.0220773	0.161861	-0.144636	0.0672816	0.0775273	-0.004549	0.12449	0.0193114	0.0930632	-0.0610195	0.0432473	-0.00443855	0.00510121	-0.0760065	-0.0389374	-0.0825511	-0.107697	-0.103169	-0.152728	-0.115644	0.109413	-0.176679	0.0613178	-0.288721	0.00475005	-0.348066	0.00178051	-0.363974	-0.0480034	0.480643	0.0513645
10	l	10	wls10rep5	0.281628	-0.0589699	0.24628	-0.0624392	0.197781	0.0618759	0.174031	-0.0171922	0.164848	-0.141817	0.0762351	0.076109	-0.00613462	0.127499	0.0136022	0.0961273	-0.0571067	0.0469513	-0.00999529	0.0093492	-0.0766398	-0.0388318	-0.0887797	-0.109019	-0.105066	-0.155231	-0.113841	0.109786	-0.176419	0.0625996	-0.297749	0.00191358	-0.344469	-0.00089021	-0.356106	-0.0519943	0.477901	0.0441741
11	l	1	wls11rep1	0.275942	-0.0582272	0.245767	-0.0599024	0.186881	0.0707872	0.180766	-0.0194501	0.15634	-0.156544	0.0711029	0.0799342	-0.00725654	0.128542	0.0160105	0.0942329	-0.0503949	0.0398108	0.0023477	0.00357809	-0.069525	-0.0404721	-0.0826367	-0.108847	-0.110982	-0.159376	-0.11064	0.114789	-0.177386	0.0585715	-0.284424	0.00633785	-0.352644	0.000769089	-0.36556	-0.0471237	0.476292	0.0525905
11	l	2	wls11rep2	0.282791	-0.063771	0.241357	-0.0601185	0.183066	0.0722456	0.18223	-0.0159406	0.15682	-0.144651	0.0693014	0.0788931	-0.00078641	0.125563	0.0244548	0.0929288	-0.0507755	0.0408658	-0.0096706	0.0103883	-0.0694624	-0.0413419	-0.0785154	-0.106528	-0.106583	-0.153943	-0.109983	0.110038	-0.17384	0.0573123	-0.294414	0.00018454	-0.35254	-0.00197395	-0.370226	-0.0459857	0.476776	0.0458345
11	l	3	wls11rep1	0.277172	-0.0579251	0.24529	-0.0592988	0.18458	0.0712853	0.181861	-0.0211892	0.154799	-0.153671	0.0730365	0.0813477	-0.00910767	0.128596	0.0177339	0.0937317	-0.0519957	0.0400446	0.00244868	0.00364787	-0.0691612	-0.0403864	-0.0803426	-0.108934	-0.110671	-0.160818	-0.110732	0.112592	-0.176529	0.0600188	-0.285671	0.00452563	-0.353354	0.000665295	-0.365823	-0.0453207	0.476466	0.0510887
11	l	4	wls11rep3	0.279029	-0.0613192	0.238506	-0.063545	0.18365	0.070241	0.17906	-0.0210901	0.154993	-0.1577	0.0793825	0.0784789	-0.0058905	0.128228	0.0201759	0.0940836	-0.0462365	0.0416914	-0.0027245	0.00903592	-0.0651234	-0.0419782	-0.07421	-0.109722	-0.107111	-0.155118	-0.113177	0.113882	-0.185729	0.05849	-0.294311	0.00599973	-0.354157	0.00253264	-0.360977	-0.048273	0.474853	0.056082
11	l	5	wls11rep2	0.284531	-0.0616786	0.240918	-0.0595089	0.18433	0.072153	0.177752	-0.0164915	0.157642	-0.148107	0.0707265	0.0786114	-0.00115322	0.125512	0.0241019	0.0929668	-0.050522	0.0426877	-0.00619498	0.00967372	-0.0708754	-0.0390142	-0.0788115	-0.108176	-0.10635	-0.15374	-0.108749	0.107603	-0.175663	0.0575033	-0.295966	0.000271742	-0.352177	-0.00238655	-0.369356	-0.0445359	0.475816	0.0466552
11	l	6	wls11rep4	0.279847	-0.0632436	0.243632	-0.063437	0.186085	0.0661399	0.177796	-0.0168565	0.15631	-0.155682	0.067252	0.078008	-0.0117866	0.125908	0.0153762	0.0927153	-0.0447917	0.0434766	-0.0063057	0.00915249	-0.0685466	-0.0417819	-0.0749536	-0.105916	-0.106445	-0.154207	-0.108366	0.112693	-0.18399	0.0611918	-0.296219	0.00572236	-0.348092	0.00137794	-0.358838	-0.0489842	0.482037	0.053722
11	l	7	wls11rep3	0.279796	-0.0607804	0.241324	-0.0633064	0.184632	0.0700659	0.178328	-0.0206295	0.152947	-0.154563	0.0751884	0.0788546	-0.00579816	0.129635	0.0180874	0.0940531	-0.044212	0.0412908	-0.00271242	0.00909114	-0.0645144	-0.039924	-0.0737073	-0.109261	-0.10852	-0.156134	-0.112846	0.113317	-0.184754	0.0599253	-0.295151	0.00400201	-0.352861	0.000210968	-0.361197	-0.0482644	0.475968	0.052417
11	l	8	wls11rep5	0.282139	-0.0557418	0.247063	-0.0596757	0.178979	0.0670616	0.176854	-0.0142767	0.159845	-0.147599	0.0754164	0.0720207	-0.00934512	0.120523	0.0147221	0.0906647	-0.0417462	0.039933	-0.00857658	0.00813571	-0.0690693	-0.0436382	-0.0836855	-0.103293	-0.111962	-0.146721	-0.113144	0.10651	-0.175721	0.0627866	-0.294674	0.00445329	-0.352745	-0.000285579	-0.361011	-0.0479774	0.486663	0.0471198
11	l	9	wls11rep4	0.279748	-0.0624099	0.245444	-0.0627305	0.186287	0.0670387	0.177475	-0.0196458	0.156144	-0.154558	0.0675672	0.0791075	-0.0115172	0.125227	0.013683	0.0922024	-0.048408	0.0433	-0.00982176	0.0108182	-0.0664528	-0.0405413	-0.0733509	-0.108381	-0.106787	-0.156388	-0.109736	0.114267	-0.179742	0.0623645	-0.295748	0.00751962	-0.347779	0.00138639	-0.358798	-0.0508014	0.481795	0.052225
11	l	10	wls11rep5	0.283654	-0.0556004	0.243444	-0.0565891	0.182039	0.0669301	0.175564	-0.0174155	0.161238	-0.147716	0.074656	0.0725808	-0.0117232	0.123298	0.0134584	0.0893806	-0.0420109	0.0344854	-0.00798503	0.00630808	-0.0677594	-0.0419601	-0.0831212	-0.10537	-0.110633	-0.145251	-0.112038	0.108398	-0.175454	0.0609037	-0.294166	0.0041923	-0.353764	0.00160359	-0.362003	-0.0461744	0.486605	0.0479967
13	l	1	wls13rep1	0.281723	-0.0594947	0.248651	-0.0602227	0.18506	0.0701146	0.180773	-0.0193489	0.158055	-0.151183	0.0681439	0.0750094	-0.00438735	0.12546	0.0183322	0.0922711	-0.0539884	0.0418574	-0.00563988	0.00822236	-0.0683847	-0.0375435	-0.0745316	-0.106673	-0.104526	-0.155348	-0.104411	0.114179	-0.167961	0.0593236	-0.295829	0.00284555	-0.35683	-0.00273265	-0.373443	-0.0452656	0.469193	0.0485278
13	l	2	wls13rep2	0.284091	-0.0578669	0.246695	-0.059703	0.182396	0.0664697	0.184654	-0.0177649	0.162668	-0.142554	0.0695623	0.0740501	-0.00602521	0.124692	0.0180642	0.0921381	-0.0489151	0.0438635	-0.00781088	0.00839661	-0.0691828	-0.0396014	-0.0770968	-0.107465	-0.104534	-0.159418	-0.119715	0.111611	-0.17557	0.0657578	-0.288748	0.00397231	-0.350357	-0.000927324	-0.372457	-0.0469974	0.472281	0.0413464
13	l	3	wls13rep1	0.279909	-0.0600874	0.248651	-0.0609265	0.183445	0.0696924	0.179013	-0.0197744	0.159716	-0.151915	0.0685066	0.0764298	-0.00411579	0.125186	0.0202066	0.089973	-0.0536923	0.0434716	-0.0073756	0.00810116	-0.0682183	-0.0359147	-0.0746421	-0.106859	-0.104718	-0.155492	-0.106315	0.110593	-0.165995	0.0591408	-0.295622	0.00484594	-0.358457	-0.000469967	-0.371834	-0.0469457	0.471539	0.0509512
13	l	4	wLs13rep3	0.281454	-0.0622667	0.241883	-0.0583083	0.184531	0.0710413	0.184854	-0.0191654	0.161231	-0.143733	0.0751965	0.077528	-0.00199773	0.132464	0.0188054	0.0995452	-0.0524639	0.0485131	-0.0140441	-0.0300323	-0.0631484	-0.0353588	-0.0746536	-0.106173	-0.0977825	-0.153562	-0.117692	0.113329	-0.174359	0.0622531	-0.290671	0.00576103	-0.356146	-0.00253581	-0.374062	-0.044554	0.469067	0.0452558
13	l	5	wls13rep2	0.281896	-0.0595355	0.246283	-0.0575861	0.18212	0.0663013	0.184556	-0.0195598	0.162767	-0.144024	0.0694984	0.0756016	-0.00779733	0.125927	0.0163543	0.0916258	-0.0503857	0.0434132	-0.00749423	0.00818329	-0.0668726	-0.0377903	-0.0764609	-0.107431	-0.103765	-0.159269	-0.119199	0.110988	-0.176711	0.0651087	-0.287643	0.00346598	-0.349076	-0.00148707	-0.373021	-0.0456826	0.474951	0.0417502
13	l	6	wls13rep4	0.285636	-0.0628137	0.243621	-0.0644519	0.176685	0.0695116	0.17564	-0.0198139	0.1521	-0.145021	0.0707495	0.0759677	-0.0100602	0.125653	0.0151095	0.0908711	-0.0433369	0.0375478	-0.00630199	0.00732123	-0.0659016	-0.0382827	-0.0719286	-0.100492	-0.101544	-0.150899	-0.108396	0.112342	-0.178324	0.0582327	-0.298001	0.00132469	-0.353581	-0.00280608	-0.367022	-0.043369	0.484855	0.0491778
13	l	7	wls13rep3	0.27865	-0.0625239	0.238638	-0.057445	0.182628	0.0704265	0.182851	-0.0199154	0.16571	-0.14699	0.0769465	0.076189	-0.00245271	0.123808	0.0177558	0.093937	-0.0500675	0.0444058	-0.00435562	0.0114598	-0.0629435	-0.0386655	-0.0750829	-0.105004	-0.0987864	-0.15132	-0.111072	0.111544	-0.171408	0.0618902	-0.294482	0.00272277	-0.362472	-0.00537453	-0.37821	-0.0500615	0.468153	0.0409166
13	l	8	wls13rep5	0.284845	-0.0596798	0.245761	-0.0580602	0.188519	0.0687759	0.175136	-0.015799	0.156457	-0.150081	0.0612563	0.0790818	8.8209e-05	0.120055	0.0210713	0.089012	-0.0506087	0.0364893	-0.00885776	0.00817559	-0.0710102	-0.0397145	-0.075892	-0.105425	-0.102499	-0.153711	-0.11321	0.10769	-0.175361	0.0598004	-0.293278	0.00542139	-0.35551	0.00315212	-0.366117	-0.0447197	0.479211	0.0495374
13	l	9	wls13rep4	0.283269	-0.0635764	0.2453	-0.0635273	0.181002	0.0702014	0.177308	-0.0224598	0.153656	-0.143487	0.0695405	0.0758004	-0.0110355	0.123838	0.0180553	0.0924087	-0.0444239	0.0379809	-0.00554892	0.00935626	-0.0672661	-0.0375565	-0.0718637	-0.101649	-0.103505	-0.151608	-0.110867	0.113064	-0.181237	0.0556421	-0.294845	0.00259274	-0.354249	-0.00278026	-0.365956	-0.0433701	0.482666	0.0491308
13	l	10	wls13rep5	0.282402	-0.0583793	0.246891	-0.0579806	0.189716	0.0687397	0.177495	-0.0181332	0.157664	-0.149905	0.0608071	0.0796592	-0.00261121	0.125358	0.0188943	0.0901948	-0.0527224	0.0377289	-0.00632133	0.00583566	-0.0701868	-0.0413913	-0.0768381	-0.106427	-0.101656	-0.155276	-0.111721	0.107644	-0.176197	0.0586497	-0.295775	0.00494542	-0.35142	0.0043858	-0.366169	-0.0439845	0.477749	0.048336
15	l	1	wls15rep1	0.28687	-0.0640087	0.24615	-0.0628138	0.189694	0.066431	0.181835	-0.020168	0.162157	-0.147179	0.0695078	0.0770481	-0.00720008	0.120059	0.0150365	0.0928241	-0.0555717	0.0417362	-0.0139101	0.0121589	-0.0738468	-0.03747	-0.0758252	-0.104749	-0.105556	-0.151722	-0.124571	0.105785	-0.175449	0.0629762	-0.299433	0.00459578	-0.343856	0.000583891	-0.355832	-0.0451382	0.479801	0.049051
15	l	2	wls15rep2	0.282024	-0.0612626	0.24337	-0.0609224	0.198087	0.0657639	0.183703	-0.0168409	0.162749	-0.142687	0.0667343	0.074655	-0.0073431	0.120926	0.0119756	0.0903442	-0.0608153	0.047941	-0.00781888	0.00856078	-0.0713327	-0.0334076	-0.0766012	-0.10449	-0.100752	-0.154276	-0.122166	0.105188	-0.170726	0.0646337	-0.299869	0.00314818	-0.350159	-0.000274582	-0.35935	-0.0486453	0.47829	0.0416456
15	l	3	wls15rep1	0.288772	-0.0654731	0.248033	-0.064228	0.189988	0.066977	0.178479	-0.019549	0.162123	-0.14848	0.0696994	0.0759753	-0.0104288	0.122752	0.015165	0.0900551	-0.0553789	0.0443387	-0.0139486	0.00761285	-0.0720438	-0.036711	-0.0775928	-0.102143	-0.105733	-0.1527	-0.122565	0.108451	-0.173576	0.0639107	-0.301345	0.00221858	-0.345742	2.91811e-05	-0.352414	-0.0440939	0.478509	0.0510592
15	l	4	wls15rep3	0.284498	-0.0612929	0.250746	-0.0646518	0.185333	0.0674524	0.178994	-0.017257	0.162001	-0.149042	0.0701942	0.0770119	-0.00504637	0.125196	0.0130512	0.0917761	-0.0565515	0.0433768	-0.00723675	0.0102229	-0.0694718	-0.0380107	-0.0770965	-0.104101	-0.102882	-0.153251	-0.114853	0.109722	-0.175738	0.0593514	-0.292483	0.00512377	-0.352616	-0.00142918	-0.364618	-0.0463676	0.473774	0.0461692
15	l	5	wls15rep2	0.283254	-0.0617639	0.242791	-0.061107	0.197633	0.0656558	0.181082	-0.0184779	0.159714	-0.146131	0.0686112	0.0780141	-0.0077856	0.121048	0.0102555	0.0943155	-0.0616222	0.0463027	-0.00810491	0.0104587	-0.0722281	-0.035053	-0.0757725	-0.106422	-0.099706	-0.154392	-0.122651	0.105428	-0.171264	0.0649162	-0.298425	0.00507905	-0.349005	-9.20172e-05	-0.356725	-0.05054	0.479949	0.0427602
15	l	6	wls15rep4	0.276529	-0.0573998	0.241409	-0.0605821	0.196597	0.0673227	0.169202	-0.0135403	0.160222	-0.148901	0.0685586	0.0758121	-0.00560408	0.121149	0.0146497	0.0940827	-0.0569088	0.040036	-0.00592702	0.00542354	-0.063961	-0.0385013	-0.0718646	-0.102283	-0.102816	-0.15351	-0.115105	0.104525	-0.175085	0.0588944	-0.294572	0.00251056	-0.353469	0.000901762	-0.367354	-0.0422747	0.485499	0.046334
15	l	7	wls15rep3	0.283386	-0.0625921	0.251777	-0.0646215	0.188429	0.068771	0.180007	-0.0172793	0.164449	-0.151191	0.0694225	0.0773011	-0.00488067	0.121552	0.0130657	0.0955135	-0.0572822	0.0435921	-0.00969828	0.0108673	-0.070151	-0.0377908	-0.0777336	-0.103875	-0.103484	-0.153034	-0.112131	0.109105	-0.178205	0.0598838	-0.291805	0.00306213	-0.351138	-4.09978e-05	-0.365246	-0.04633	0.471218	0.0471074
15	l	8	wls15rep5	0.277996	-0.0561836	0.247268	-0.0591609	0.186712	0.0637049	0.173095	-0.0149432	0.167425	-0.140616	0.0681503	0.0749418	-0.00428352	0.118693	0.0110395	0.0921355	-0.0489697	0.0427702	-0.00700845	0.0109363	-0.0762045	-0.0378319	-0.0830589	-0.105198	-0.103617	-0.153925	-0.120205	0.104907	-0.178807	0.0607757	-0.296777	0.004518	-0.346359	0.000986573	-0.357256	-0.0465914	0.49086	0.0400807
15	l	9	wls15rep4	0.275646	-0.0611338	0.239012	-0.0586236	0.194172	0.0659178	0.170212	-0.015258	0.162992	-0.147269	0.0698682	0.0781216	-0.00809199	0.122117	0.0138368	0.0930067	-0.0557469	0.0444068	-0.00697326	0.00425878	-0.0650701	-0.0377704	-0.0714259	-0.103588	-0.102416	-0.152993	-0.11218	0.107171	-0.178225	0.056491	-0.29411	0.00370303	-0.351396	0.000269461	-0.367357	-0.0446465	0.487255	0.0458194
15	l	10	wls15rep5	0.278699	-0.0589505	0.246678	-0.0596704	0.18278	0.0642831	0.172533	-0.0153253	0.168424	-0.141521	0.0694096	0.0742833	-0.00775858	0.121316	0.0105518	0.0920375	-0.0478131	0.0422638	-0.00809202	0.00908086	-0.0769206	-0.0378678	-0.0838749	-0.105257	-0.104043	-0.152234	-0.118994	0.104533	-0.177217	0.0622078	-0.295325	0.0060918	-0.345407	0.000885467	-0.356847	-0.048444	0.493216	0.0422882
16	l	1	wls16rep1	0.282196	-0.0600123	0.246493	-0.0601196	0.197245	0.0646511	0.173622	-0.013082	0.160388	-0.149304	0.0722024	0.0774395	-0.00322078	0.121254	0.0153329	0.092991	-0.0517519	0.041177	-0.0144441	0.0127797	-0.0732109	-0.0351274	-0.0837997	-0.104292	-0.106181	-0.157864	-0.119462	0.10405	-0.183251	0.0590633	-0.297594	0.00577928	-0.347398	0.00108492	-0.349912	-0.0472213	0.482746	0.0467514
16	l	2	wls16rep2	0.283509	-0.0612291	0.247529	-0.0604525	0.196059	0.0648682	0.174095	-0.0118232	0.161183	-0.147331	0.0710009	0.0746993	-0.0046485	0.119995	0.0185446	0.0883086	-0.0414939	0.0397084	-0.0140856	0.0129172	-0.0741234	-0.0356815	-0.0803626	-0.101659	-0.106411	-0.152595	-0.123852	0.103861	-0.178341	0.0563898	-0.299889	0.00626523	-0.348963	0.00322653	-0.358802	-0.0478806	0.479051	0.0484139
16	l	3	wls16rep1	0.283444	-0.0589867	0.247878	-0.0591052	0.194822	0.0641205	0.1749	-0.0140648	0.16139	-0.151561	0.0752604	0.0739124	-0.00310239	0.120069	0.0118044	0.0926626	-0.0514206	0.040283	-0.0138758	0.0137997	-0.0741937	-0.0335718	-0.0829266	-0.102845	-0.107368	-0.157642	-0.120314	0.105057	-0.183844	0.0602209	-0.295937	0.00673258	-0.345549	0.00203965	-0.352364	-0.0489252	0.481397	0.0478052
16	l	4	wls16rep3	0.280623	-0.0570969	0.251272	-0.0617051	0.18981	0.0655246	0.176341	-0.0181682	0.167373	-0.148163	0.0700099	0.0778173	-0.00533452	0.119564	0.0130541	0.0927231	-0.0506639	0.0450373	-0.00758844	0.0106693	-0.0699236	-0.0392172	-0.0806796	-0.102781	-0.106904	-0.15149	-0.112128	0.106247	-0.171031	0.0631193	-0.303634	0.00288765	-0.354906	0.00140175	-0.359212	-0.0504305	0.473519	0.0440618
16	l	5	wls16rep2	0.283098	-0.0594805	0.248688	-0.0607281	0.197117	0.0645112	0.17679	-0.0141706	0.162876	-0.144111	0.0738588	0.0740092	-0.00735548	0.118091	0.016076	0.0882104	-0.0421248	0.0393533	-0.0129243	0.01238	-0.0726857	-0.034485	-0.0808532	-0.102012	-0.106633	-0.151183	-0.124306	0.105188	-0.176961	0.0574646	-0.298859	0.00368925	-0.349478	0.00259687	-0.362604	-0.0463001	0.476281	0.0469768
16	l	6	wls16rep4	0.283999	-0.0586439	0.250791	-0.0609198	0.189944	0.0641126	0.179033	-0.0200436	0.163888	-0.149434	0.0766539	0.0737717	-0.00570289	0.118915	0.0187747	0.0904166	-0.0518677	0.0406289	-0.00904751	0.00807608	-0.0729734	-0.0374267	-0.0839036	-0.104264	-0.10667	-0.155019	-0.125688	0.106969	-0.175157	0.065963	-0.292448	0.00532946	-0.350713	0.00282199	-0.361258	-0.0448638	0.472343	0.0536103
16	l	7	wls16rep3	0.281542	-0.0615416	0.251244	-0.0621286	0.190358	0.0668377	0.176826	-0.0167722	0.16596	-0.146238	0.0706696	0.0792262	-0.00636414	0.121414	0.00978411	0.0932011	-0.0489621	0.0425897	-0.0073332	0.0104137	-0.0718605	-0.0407545	-0.082253	-0.102465	-0.107119	-0.153311	-0.111288	0.107793	-0.17059	0.0629639	-0.303134	0.00290082	-0.352984	-0.000739468	-0.358301	-0.0485327	0.473805	0.0451418
16	l	8	wls16rep5	0.291247	-0.0601447	0.247214	-0.0598664	0.197625	0.0644504	0.171861	-0.0119616	0.161973	-0.145155	0.0700787	0.0731659	-0.00644818	0.11544	0.0150645	0.0886485	-0.0446788	0.0357259	-0.0181536	0.0131878	-0.0726903	-0.0372832	-0.0778483	-0.102074	-0.106628	-0.15316	-0.125355	0.097677	-0.177773	0.0602816	-0.297828	0.00570477	-0.345493	0.00555162	-0.362043	-0.0404203	0.479876	0.0502316
16	l	9	wls16rep4	0.283781	-0.0609913	0.250934	-0.0614379	0.188155	0.0641639	0.182746	-0.0213249	0.165352	-0.152322	0.0765458	0.0734186	-0.00776257	0.11902	0.0185867	0.0900797	-0.051334	0.0438882	-0.00926385	0.00762458	-0.071436	-0.0383526	-0.0833981	-0.101205	-0.10762	-0.149789	-0.128718	0.103374	-0.17744	0.0659772	-0.294884	0.00524997	-0.349557	0.0019213	-0.35787	-0.0444003	0.473182	0.0551053
16	l	10	wls16rep5	0.290905	-0.0598246	0.248678	-0.0593278	0.195062	0.0681757	0.173545	-0.0132234	0.160032	-0.146841	0.0695393	0.0753104	-0.00878852	0.117377	0.01857	0.0876118	-0.0429826	0.0344825	-0.0184837	0.0135362	-0.0710015	-0.0385211	-0.0761653	-0.103309	-0.108777	-0.153013	-0.124081	0.100052	-0.17788	0.0588366	-0.298364	0.00788671	-0.345813	0.00593172	-0.361939	-0.0436508	0.477945	0.0485106
17	l	1	wls17rep1	0.282674	-0.0606399	0.246926	-0.0599107	0.190371	0.0685892	0.178445	-0.0172161	0.151711	-0.150929	0.0668093	0.0795097	-0.00729698	0.122617	0.0167484	0.0907103	-0.0564342	0.0433004	-0.0152434	0.0139062	-0.0735758	-0.0364718	-0.07504	-0.107966	-0.103105	-0.156789	-0.112029	0.107665	-0.168075	0.0627707	-0.291088	0.00393311	-0.344254	-0.00159958	-0.370303	-0.0486859	0.48276	0.0472065
17	l	2	wls17rep2	0.276342	-0.0589234	0.240395	-0.0629389	0.183449	0.0720304	0.179246	-0.0206372	0.156569	-0.154197	0.0754547	0.0775552	-0.00393264	0.125702	0.0184565	0.0936288	-0.0562003	0.0452447	-0.00398794	0.00680401	-0.0644109	-0.0387748	-0.0731541	-0.107084	-0.104807	-0.154905	-0.106983	0.108726	-0.164074	0.0604897	-0.297573	0.00128582	-0.356685	-0.00168339	-0.373696	-0.044838	0.475592	0.0525162
17	l	3	wls17rep1	0.280194	-0.0611665	0.246348	-0.0605572	0.191916	0.0695974	0.181828	-0.0162675	0.153038	-0.151587	0.0627119	0.0791145	-0.00916271	0.125829	0.0183137	0.0899179	-0.0546934	0.0444576	-0.0154244	0.0152044	-0.0740094	-0.0388438	-0.0771056	-0.106395	-0.103301	-0.155301	-0.112356	0.105191	-0.16824	0.0622352	-0.29118	0.00351112	-0.344442	-0.00386106	-0.368345	-0.0472889	0.48391	0.0462099
17	l	4	wls17rep3	0.284421	-0.062437	0.248237	-0.0627613	0.188082	0.065155	0.183266	-0.0163984	0.165786	-0.140126	0.0690088	0.0738725	-0.0178051	0.121673	0.00756306	0.0915788	-0.0463447	0.0298173	-0.024971	0.0123849	-0.0708505	-0.0366018	-0.0774253	-0.10382	-0.0949418	-0.151251	-0.114824	0.104833	-0.180263	0.0589295	-0.284183	0.0110425	-0.351589	0.00359721	-0.367135	-0.0441405	0.483969	0.0446526
17	l	5	wls17rep2	0.276563	-0.06163	0.241339	-0.0618968	0.1817	0.0700564	0.181159	-0.0236	0.155013	-0.154754	0.0738871	0.0775312	-0.00336567	0.127297	0.0190488	0.0951421	-0.0547279	0.0425762	-0.00390046	0.00628739	-0.0663444	-0.0389446	-0.0743518	-0.103655	-0.103169	-0.156088	-0.106639	0.110355	-0.166147	0.060591	-0.297694	0.00282127	-0.355464	-0.00238085	-0.372539	-0.0456128	0.475632	0.0559049
17	l	6	wls17rep4	0.286053	-0.0613675	0.245363	-0.0617552	0.192555	0.0640304	0.182252	-0.0169609	0.157365	-0.143655	0.0818839	0.0717052	-0.0124084	0.123165	0.0177854	0.0887998	-0.0433015	0.0355238	-0.0109161	0.010318	-0.075428	-0.0354418	-0.0815115	-0.101789	-0.108956	-0.145184	-0.120246	0.1067	-0.179351	0.0570517	-0.290434	0.00187056	-0.353349	0.000430824	-0.364242	-0.0454053	0.476885	0.0519627
17	l	7	wls17rep3	0.280688	-0.0611874	0.247092	-0.0578976	0.188339	0.0657603	0.182884	-0.0196682	0.16795	-0.139732	0.069628	0.0764643	-0.0157973	0.120049	0.00728791	0.0883127	-0.0473341	0.034725	-0.0252566	0.00916345	-0.0724664	-0.0355682	-0.0771018	-0.103064	-0.0952409	-0.154382	-0.112468	0.1052	-0.179849	0.0596438	-0.285691	0.0121176	-0.351425	0.00242987	-0.366977	-0.0452827	0.485739	0.0429165
17	l	8	wls17rep5	0.283067	-0.0636973	0.253901	-0.0627994	0.190953	0.0655642	0.177555	-0.019101	0.165354	-0.149579	0.0657448	0.0754422	-0.0104348	0.120954	0.00695942	0.0919063	-0.0526609	0.040811	-0.00446224	0.00888389	-0.0673665	-0.0382487	-0.0808824	-0.104622	-0.105391	-0.151688	-0.119726	0.105579	-0.176686	0.0633735	-0.295312	0.00682632	-0.34509	0.00233988	-0.362179	-0.0435917	0.476657	0.0516478
17	l	9	wls17rep4	0.288522	-0.0611313	0.246073	-0.0651034	0.192024	0.0674691	0.185208	-0.0187426	0.156722	-0.14464	0.0817905	0.071483	-0.0155968	0.12469	0.0162614	0.0904206	-0.0428334	0.0337084	-0.010625	0.0086167	-0.0747586	-0.0350433	-0.0825434	-0.0973082	-0.108364	-0.149714	-0.122887	0.108358	-0.179941	0.0570888	-0.292315	0.00230814	-0.351301	-0.00106569	-0.36019	-0.0430566	0.474754	0.0516633
17	l	10	wls17rep5	0.281907	-0.0613105	0.252217	-0.0658577	0.19152	0.0678203	0.177803	-0.0205164	0.165633	-0.151064	0.0660781	0.0758544	-0.0101536	0.121367	0.00708966	0.090497	-0.0523772	0.0411712	-0.00233338	0.00907306	-0.0670678	-0.0379326	-0.0769463	-0.104681	-0.103266	-0.15161	-0.12312	0.10629	-0.178115	0.0656898	-0.295141	0.00709839	-0.346756	0.00276403	-0.362196	-0.045177	0.475223	0.0505237
18	l	1	wls18rep1	0.283652	-0.0565479	0.248192	-0.0574951	0.191687	0.0651941	0.17839	-0.0151412	0.160567	-0.146341	0.0764128	0.0718605	-0.00528002	0.118861	0.0170649	0.0876501	-0.048872	0.0437831	-0.011638	0.0127856	-0.0717836	-0.0380024	-0.0835373	-0.103862	-0.109979	-0.153291	-0.11496	0.101958	-0.174798	0.0603692	-0.297073	0.00562196	-0.352173	1.37959e-05	-0.362903	-0.0456864	0.477032	0.0482696
18	l	2	wls18rep2	0.283934	-0.0605006	0.249372	-0.0606945	0.187597	0.0668411	0.184618	-0.0184299	0.165749	-0.146418	0.0711953	0.0742542	-0.00740864	0.121049	0.01293	0.0894812	-0.0565001	0.04128	-0.0154499	0.0144343	-0.0733301	-0.0394603	-0.0810334	-0.104021	-0.102652	-0.152529	-0.117921	0.105453	-0.175266	0.0590486	-0.293045	0.00366425	-0.349482	0.00104347	-0.361344	-0.0410754	0.478038	0.0465786
18	l	3	wls18rep1	0.281581	-0.0577506	0.246822	-0.0551905	0.190996	0.0639687	0.179867	-0.0153085	0.160277	-0.146569	0.0761358	0.0741326	-0.00493202	0.117322	0.0192704	0.0855972	-0.0508205	0.0406065	-0.00908625	0.0122165	-0.0729492	-0.0379532	-0.0825374	-0.102702	-0.110814	-0.151906	-0.116757	0.100722	-0.176376	0.0607203	-0.295532	0.0048954	-0.353526	0.00359522	-0.361573	-0.0466258	0.479953	0.0502298
18	l	4	wls18rep3	0.280962	-0.0613228	0.244358	-0.0629533	0.17694	0.0692944	0.176872	-0.0163504	0.169426	-0.143807	0.0655955	0.0800388	-0.003321	0.121317	0.0153744	0.0915695	-0.0585757	0.0428194	-0.00600847	0.0116246	-0.0706052	-0.0377232	-0.0801298	-0.101803	-0.10682	-0.151771	-0.114209	0.105291	-0.176552	0.0572444	-0.289842	0.00378483	-0.349663	0.000749337	-0.362968	-0.0489916	0.489165	0.0409892
18	l	5	wls18rep2	0.281203	-0.0598162	0.251856	-0.0617088	0.184367	0.0656932	0.184854	-0.0206442	0.165974	-0.142781	0.0738077	0.0731265	-0.00876357	0.119283	0.0144224	0.0906335	-0.0549517	0.0424652	-0.0150627	0.0121833	-0.0734938	-0.0376487	-0.0817533	-0.10389	-0.103353	-0.152363	-0.116895	0.104856	-0.175923	0.0590494	-0.292478	0.00715961	-0.350569	-0.00065101	-0.362418	-0.0427385	0.479177	0.0477907
18	l	6	wls18rep4	0.277864	-0.0558058	0.242171	-0.0562486	0.184935	0.0636455	0.181909	-0.0225175	0.158904	-0.146882	0.076111	0.0706864	-0.00571427	0.119996	0.0216691	0.0890356	-0.065121	0.0447895	-0.00129175	0.00221794	-0.0750529	-0.0375719	-0.0782486	-0.101952	-0.104369	-0.148409	-0.118546	0.10438	-0.176179	0.0583518	-0.294603	0.00665686	-0.35121	0.00186418	-0.361578	-0.0448055	0.48835	0.0525678
18	l	7	wls18rep3	0.281904	-0.0613753	0.245281	-0.0630548	0.17765	0.069181	0.178999	-0.0187639	0.169939	-0.145831	0.0657536	0.0780081	-0.00456129	0.12147	0.0164344	0.0930336	-0.0605763	0.0468814	-0.0088833	0.0121831	-0.0721479	-0.0395283	-0.0806483	-0.100103	-0.107761	-0.151913	-0.113714	0.104815	-0.171058	0.0610452	-0.292871	0.00396562	-0.349641	-0.00187338	-0.360637	-0.0503562	0.486539	0.0422153
18	l	8	wls18rep5	0.283496	-0.0587901	0.248345	-0.0605095	0.184416	0.064553	0.1746	-0.0166962	0.164767	-0.144045	0.075505	0.0720732	-0.00457985	0.119922	0.0127015	0.0911044	-0.0541553	0.0404122	-0.00691275	0.00928231	-0.0714648	-0.0402574	-0.0818537	-0.105946	-0.108372	-0.150888	-0.108885	0.106695	-0.166522	0.0606097	-0.293883	0.00705075	-0.357845	-0.000422613	-0.367078	-0.045368	0.477721	0.051221
18	l	9	wls18rep4	0.277227	-0.0562455	0.241581	-0.0567681	0.185995	0.0623571	0.182289	-0.0195286	0.157266	-0.145145	0.0764181	0.073316	-0.00356856	0.121894	0.0196774	0.0901572	-0.0636974	0.0429619	-0.00354155	0.00155479	-0.072462	-0.0356258	-0.0783193	-0.103135	-0.10294	-0.15192	-0.116703	0.104198	-0.175518	0.060428	-0.294639	0.00484376	-0.352524	0.00225763	-0.363256	-0.04622	0.486715	0.0506186
18	l	10	wls18rep5	0.282258	-0.0619005	0.24945	-0.0625278	0.182483	0.0651481	0.174554	-0.0165999	0.16611	-0.140368	0.0736815	0.0724605	-0.0041005	0.121262	0.0132146	0.092509	-0.0528917	0.0377258	-0.0079548	0.0113166	-0.0711884	-0.0405844	-0.0797184	-0.10679	-0.107851	-0.151157	-0.111135	0.104978	-0.168622	0.0588397	-0.292296	0.00971641	-0.35847	0.000980286	-0.366456	-0.0462306	0.478933	0.0512224
19	l	1	wls19rep1	0.284639	-0.0585861	0.251094	-0.0621261	0.191637	0.0627585	0.185546	-0.0197395	0.170336	-0.143101	0.0686827	0.0714389	-0.0152659	0.118253	0.00719962	0.0883738	-0.0478661	0.0406996	-0.00764386	0.00887198	-0.0777097	-0.0321569	-0.0877233	-0.0997732	-0.111064	-0.147037	-0.116161	0.10358	-0.167574	0.062171	-0.304581	0.00349291	-0.347141	-0.00109794	-0.355606	-0.0444403	0.479201	0.048419
19	l	2	wls19rep2	0.279842	-0.057503	0.258683	-0.0608094	0.178851	0.064667	0.18288	-0.0181821	0.161811	-0.14829	0.0660729	0.0747472	-0.0124476	0.120456	0.0109497	0.0951172	-0.0431768	0.039818	-0.00717598	0.0113527	-0.0664012	-0.0418767	-0.0796458	-0.103852	-0.11261	-0.155844	-0.110337	0.108648	-0.165423	0.0656189	-0.301368	0.0038921	-0.348084	0.00104567	-0.367394	-0.046582	0.474974	0.0475767
19	l	3	wls19rep1	0.285057	-0.0568233	0.251532	-0.0603471	0.192165	0.0644786	0.186696	-0.0204387	0.170795	-0.141236	0.0699484	0.0707266	-0.0132736	0.115067	0.00760166	0.0861105	-0.049011	0.0394023	-0.00700463	0.0107074	-0.0772994	-0.0343063	-0.0911134	-0.0975732	-0.110678	-0.149097	-0.117888	0.104744	-0.166807	0.0640347	-0.303093	0.00297522	-0.348103	-0.00224758	-0.357232	-0.0430821	0.477708	0.0469049
19	l	4	wls19rep3	0.286168	-0.0570628	0.252292	-0.0576118	0.180652	0.0616392	0.178589	-0.0175853	0.171408	-0.142288	0.0684725	0.0694786	-0.0107767	0.119251	0.0109917	0.0877624	-0.0542245	0.0390812	-0.0047793	0.00655498	-0.0742145	-0.0335659	-0.080899	-0.0967097	-0.109466	-0.149712	-0.116613	0.102314	-0.16379	0.0683983	-0.302135	0.00201766	-0.350908	-0.00183592	-0.362482	-0.0438949	0.481715	0.0437693
19	l	5	wls19rep2	0.281089	-0.0576255	0.258196	-0.0601442	0.179533	0.0675129	0.182503	-0.0171383	0.163537	-0.15038	0.0676844	0.0757058	-0.0148101	0.121505	0.0111994	0.0929428	-0.0425294	0.0395247	-0.0066177	0.0108709	-0.0678374	-0.041454	-0.0803687	-0.105831	-0.112202	-0.154334	-0.109455	0.108722	-0.165485	0.0641936	-0.301145	0.00470264	-0.34862	0.000361	-0.367463	-0.0455319	0.472792	0.046397
19	l	6	wls19rep4	0.279638	-0.0589369	0.252284	-0.0608738	0.179315	0.0686484	0.188957	-0.0202118	0.163906	-0.151083	0.0650058	0.0775898	-0.0133135	0.126266	0.0134888	0.0919753	-0.0487779	0.0404286	-0.00272221	0.00650551	-0.0688266	-0.038227	-0.079081	-0.102383	-0.10689	-0.153975	-0.115319	0.110707	-0.168498	0.0642811	-0.308459	0.00188452	-0.345197	0.000648857	-0.360364	-0.0468155	0.474854	0.0435713
19	l	7	wls19rep3	0.285589	-0.0568729	0.253051	-0.05868	0.181034	0.0628478	0.179154	-0.0163417	0.1674	-0.143776	0.0677123	0.0691064	-0.00911074	0.118812	0.0102184	0.0872494	-0.0538115	0.0422648	-0.00417751	0.00736688	-0.0721665	-0.034073	-0.0812041	-0.0973391	-0.108316	-0.151563	-0.119995	0.103864	-0.164569	0.0699974	-0.301375	0.00215143	-0.349975	-0.00431293	-0.361586	-0.043876	0.482128	0.0431749
19	l	8	wls19rep5	0.281758	-0.0576929	0.241864	-0.0586508	0.19031	0.0642984	0.184533	-0.0222262	0.165534	-0.144091	0.0749421	0.0720018	-0.00172772	0.116956	0.0125772	0.0870304	-0.0501613	0.0423248	-0.00509919	0.0121544	-0.0681972	-0.0379515	-0.0815385	-0.102246	-0.108341	-0.151155	-0.109287	0.106026	-0.162775	0.0643249	-0.30805	0.00341248	-0.353726	-0.00259057	-0.372831	-0.0447751	0.470214	0.0528488
19	l	9	wls19rep4	0.279545	-0.0574076	0.255258	-0.0622019	0.178239	0.0680524	0.187724	-0.0225665	0.165111	-0.146445	0.0674307	0.0755929	-0.0115735	0.12221	0.0127854	0.0925454	-0.0515681	0.03947	-0.00311162	0.0069995	-0.0672849	-0.0384758	-0.0773034	-0.102682	-0.106214	-0.152121	-0.114338	0.110314	-0.17091	0.0646601	-0.308399	0.00302051	-0.347406	0.000360103	-0.361911	-0.0453921	0.473927	0.0440671
19	l	10	wls19rep5	0.28063	-0.0583748	0.244372	-0.0595312	0.193006	0.0633567	0.181985	-0.0191136	0.1661	-0.14648	0.0741603	0.0714261	-0.00406218	0.118344	0.0137941	0.0881865	-0.0473785	0.0398748	-0.00431567	0.00800609	-0.067164	-0.0383822	-0.0822416	-0.100678	-0.109072	-0.14951	-0.111651	0.105746	-0.163457	0.0622237	-0.308536	0.00333242	-0.352132	0.000862118	-0.373309	-0.044736	0.469271	0.0554468
20	l	1	wls20rep1	0.284163	-0.0607863	0.242165	-0.0581145	0.20155	0.0656709	0.189609	-0.0191322	0.153596	-0.143371	0.0747135	0.0720575	-0.00990291	0.121076	0.0113658	0.0896654	-0.0646357	0.0455374	-0.0178421	0.011532	-0.0724559	-0.0351662	-0.0777113	-0.0985828	-0.101857	-0.150367	-0.117108	0.101004	-0.181569	0.0592938	-0.29225	0.00380498	-0.346655	-0.00169674	-0.359233	-0.0469515	0.484056	0.0445269
20	l	2	wls20rep2	0.286858	-0.0569817	0.254212	-0.0567234	0.193505	0.0634673	0.187429	-0.0162893	0.16466	-0.143065	0.0702674	0.073516	-0.0073821	0.115852	0.0195834	0.086618	-0.0551357	0.0400541	-0.0208851	0.0125717	-0.0775021	-0.0359452	-0.0888858	-0.0993338	-0.107389	-0.144531	-0.121771	0.098629	-0.17289	0.0573166	-0.285784	0.00199107	-0.351088	-0.0011175	-0.365911	-0.040907	0.478107	0.0448781
20	l	3	wls20rep1	0.285653	-0.0623415	0.242792	-0.0570939	0.201557	0.0653212	0.191052	-0.0204159	0.153904	-0.142278	0.0737427	0.0744784	-0.00927528	0.1188	0.0127913	0.0889385	-0.0650906	0.0416304	-0.0190825	0.01407	-0.0722381	-0.0334107	-0.0801214	-0.097715	-0.105254	-0.151165	-0.117488	0.101417	-0.180494	0.0589525	-0.291461	0.00362915	-0.345958	-0.00175954	-0.358655	-0.0470527	0.483624	0.0459951
20	l	4	wls20rep3	0.282322	-0.0612856	0.247816	-0.0599121	0.192413	0.0664343	0.185099	-0.0163143	0.156706	-0.140632	0.0663615	0.0768744	-0.0107893	0.121516	0.00895702	0.0919592	-0.05015	0.0433128	-0.0156125	0.0144731	-0.0733093	-0.0362818	-0.0816923	-0.106001	-0.110519	-0.14969	-0.114642	0.105572	-0.171286	0.0600974	-0.296568	0.000826889	-0.347974	7.10164e-05	-0.354617	-0.0516894	0.487486	0.0406688
20	l	5	wls20rep2	0.288891	-0.0545963	0.25259	-0.0579718	0.19178	0.0676095	0.189376	-0.0176285	0.163092	-0.148049	0.0702971	0.0738902	-0.00741213	0.11615	0.0177787	0.0869515	-0.0532789	0.0402744	-0.020793	0.0146486	-0.0773791	-0.0357496	-0.0886965	-0.099161	-0.108978	-0.146186	-0.123613	0.0988117	-0.174697	0.057437	-0.283913	0.00376698	-0.34925	-0.0030368	-0.36402	-0.0410371	0.478226	0.043877
20	l	6	wls20rep4	0.282385	-0.0603989	0.246377	-0.0593305	0.203477	0.0647758	0.181819	-0.0138387	0.162846	-0.145088	0.0664524	0.0781063	-0.0135441	0.123244	0.0134476	0.0908517	-0.0557847	0.0460608	-0.0116369	0.0134286	-0.0763466	-0.0348495	-0.0852374	-0.0987695	-0.103108	-0.149981	-0.124186	0.102483	-0.17969	0.0586487	-0.293715	0.000762064	-0.34636	-0.00194109	-0.351607	-0.0498985	0.484414	0.0357348
20	l	7	wls20rep3	0.28028	-0.0631507	0.246141	-0.0599888	0.193333	0.0695179	0.184896	-0.0184662	0.158518	-0.141298	0.0666396	0.0765442	-0.00903287	0.119122	0.0110314	0.09132	-0.0512579	0.0452077	-0.0135947	0.0138887	-0.0751793	-0.037851	-0.0850261	-0.105423	-0.107195	-0.152234	-0.116021	0.105737	-0.170569	0.0617373	-0.29585	0.00259954	-0.349696	-0.00127778	-0.353918	-0.0498448	0.4865	0.0438604
20	l	8	wls20rep5	0.288149	-0.0570297	0.245086	-0.0597757	0.193353	0.0649421	0.188776	-0.0169796	0.156944	-0.14411	0.0770023	0.0721114	-0.00591309	0.119344	0.0245844	0.084483	-0.0492403	0.0373476	-0.0131722	0.010389	-0.0782679	-0.0388037	-0.0874561	-0.101193	-0.109073	-0.145895	-0.122787	0.100818	-0.177503	0.056549	-0.296566	0.00532934	-0.350944	0.00156073	-0.359507	-0.0425323	0.476537	0.053446
20	l	9	wls20rep4	0.283061	-0.0596715	0.247025	-0.0586893	0.203203	0.0636924	0.180012	-0.0144391	0.164235	-0.143001	0.0655249	0.0807076	-0.0129948	0.119378	0.0124523	0.0933332	-0.0556029	0.0460446	-0.0147618	0.0146784	-0.0742757	-0.0355633	-0.0853174	-0.100666	-0.104785	-0.151367	-0.119	0.106283	-0.181335	0.0589323	-0.290701	0.00296313	-0.348566	-0.00381133	-0.351992	-0.0524061	0.483817	0.0336031
20	l	10	wls20rep5	0.287093	-0.0549187	0.244004	-0.0577237	0.191659	0.0652647	0.188525	-0.0188776	0.15725	-0.144391	0.0787126	0.0714647	-0.00473331	0.116872	0.0244947	0.0841846	-0.0493181	0.0369188	-0.0114422	0.00957936	-0.0765173	-0.0397337	-0.0891238	-0.101359	-0.111517	-0.149616	-0.120843	0.101672	-0.179033	0.05812	-0.2977	0.00845396	-0.347279	0.00163337	-0.361441	-0.0430194	0.477212	0.0554742
21	l	1	wls21rep1	0.288981	-0.0595237	0.256153	-0.0644535	0.175517	0.0639	0.175653	-0.0174343	0.161207	-0.149704	0.0620583	0.0776391	-0.00942964	0.121528	0.0111161	0.0922225	-0.0485197	0.0437076	-0.00519351	0.0150438	-0.0748687	-0.037756	-0.0861839	-0.106162	-0.106592	-0.158188	-0.111369	0.109098	-0.172345	0.06455	-0.290464	0.00329626	-0.34556	0.00143117	-0.361741	-0.047395	0.481581	0.0482002
21	l	2	wls21rep2	0.279795	-0.060817	0.245748	-0.0615374	0.175553	0.065556	0.185656	-0.0207664	0.155834	-0.148442	0.0715864	0.0768583	-0.0030106	0.121618	0.0119798	0.0949292	-0.0501509	0.0435957	-0.00192193	0.0120874	-0.0711683	-0.0363282	-0.0850363	-0.105972	-0.106	-0.159501	-0.112299	0.109179	-0.17547	0.0636529	-0.289342	0.00662174	-0.34689	-0.00011802	-0.36758	-0.0518005	0.482719	0.0511839
21	l	3	wls21rep1	0.289183	-0.0618602	0.256885	-0.0631844	0.174022	0.0650947	0.178129	-0.0166984	0.161764	-0.152409	0.0624285	0.0782107	-0.0107719	0.123951	0.0133186	0.0923727	-0.0498402	0.0441879	-0.004838	0.013574	-0.0761621	-0.0391751	-0.0853962	-0.107833	-0.109086	-0.157546	-0.112621	0.111197	-0.173672	0.0646196	-0.289681	0.00276522	-0.344743	0.000722704	-0.358654	-0.0465265	0.479735	0.0485371
21	l	4	wls21rep3	0.284955	-0.0594138	0.252424	-0.0619577	0.183839	0.0669121	0.172364	-0.0180725	0.164463	-0.152722	0.069475	0.0806203	-0.0053499	0.123107	0.013989	0.0973259	-0.0531977	0.0422245	-0.00367177	0.0102489	-0.076913	-0.0394876	-0.0851193	-0.112228	-0.108232	-0.156636	-0.111336	0.112093	-0.176183	0.0657315	-0.303179	0.00413813	-0.34318	0.00171318	-0.351493	-0.0503926	0.476344	0.0467963
21	l	5	wls21rep2	0.280414	-0.0623599	0.242687	-0.0626259	0.176462	0.0674382	0.184375	-0.0222619	0.156946	-0.148376	0.0703974	0.0769307	-0.00400695	0.123361	0.0126181	0.0946036	-0.0491171	0.0450001	-0.001364	0.00991408	-0.0702193	-0.0367879	-0.0834058	-0.102746	-0.104775	-0.159995	-0.115605	0.107262	-0.172591	0.0645172	-0.290521	0.00409569	-0.347771	-0.000919735	-0.367817	-0.0489374	0.483292	0.0518859
21	l	6	wls21rep4	0.285681	-0.0603174	0.255637	-0.0617527	0.171229	0.0648358	0.180531	-0.0188491	0.16553	-0.149744	0.0657196	0.0766191	-0.0051034	0.122385	0.00706681	0.090201	-0.0469347	0.0433401	-0.00830253	0.0133038	-0.0708805	-0.0392756	-0.0840995	-0.105439	-0.109126	-0.156226	-0.110604	0.106275	-0.174968	0.0633462	-0.290833	0.0046767	-0.345551	0.000733609	-0.365566	-0.0436175	0.480574	0.0495058
21	l	7	wls21rep3	0.283059	-0.059233	0.250686	-0.0617699	0.182875	0.0682061	0.174947	-0.0172999	0.164902	-0.152576	0.0703346	0.0796259	-0.00367207	0.123634	0.0151137	0.0962415	-0.0534787	0.0418598	-0.00499675	0.0139891	-0.0770663	-0.0394619	-0.0852213	-0.111852	-0.10868	-0.15779	-0.110883	0.113121	-0.176339	0.0634941	-0.303987	0.00438092	-0.344259	0.000221984	-0.35032	-0.0503593	0.476986	0.045567
21	l	8	wls21rep5	0.282183	-0.0595747	0.247686	-0.060365	0.177755	0.06797	0.177889	-0.0179064	0.161584	-0.148217	0.0676316	0.0802668	-0.00511437	0.127124	0.0132902	0.0948596	-0.046088	0.0455843	-0.0104312	0.0137129	-0.074568	-0.0403353	-0.0895035	-0.106052	-0.113638	-0.160402	-0.107849	0.109344	-0.165768	0.0674079	-0.289338	0.00225498	-0.34401	-0.0040712	-0.365573	-0.0551157	0.483862	0.0435154
21	l	9	wls21rep4	0.283545	-0.0614459	0.253844	-0.0609967	0.170168	0.0677219	0.180626	-0.0181884	0.164826	-0.150891	0.065702	0.0759191	-0.00537256	0.120154	0.00778886	0.0932734	-0.0453336	0.0426273	-0.00856636	0.012812	-0.0713491	-0.0395908	-0.0826415	-0.104323	-0.10821	-0.156841	-0.110618	0.106167	-0.175156	0.0634254	-0.289125	0.00652719	-0.346397	-0.000450048	-0.366569	-0.0447593	0.482838	0.0488596
21	l	10	wls21rep5	0.282209	-0.0586863	0.247814	-0.0595658	0.178105	0.0700378	0.178109	-0.0174171	0.16184	-0.149219	0.0679131	0.0801764	-0.00510237	0.124873	0.0136923	0.0945816	-0.0472106	0.045651	-0.00974437	0.0136098	-0.0753794	-0.040093	-0.0886251	-0.107845	-0.114016	-0.159913	-0.104585	0.112003	-0.166956	0.0652629	-0.291463	0.00215972	-0.344487	-0.00648108	-0.364778	-0.0519442	0.482666	0.0428082
22	l	1	wls22rep1	0.284843	-0.0646466	0.249677	-0.063152	0.190672	0.0724728	0.176173	-0.0136286	0.160288	-0.158555	0.0669957	0.079918	-0.00892662	0.120894	0.0127153	0.0935979	-0.0491009	0.042029	-0.0111429	0.0128493	-0.0684188	-0.0437989	-0.0734146	-0.106777	-0.113422	-0.157158	-0.116309	0.109069	-0.16783	0.060301	-0.291018	0.00783694	-0.347851	0.00186201	-0.366468	-0.0458604	0.472538	0.0527466
22	l	2	wls22rep2	0.276299	-0.0582948	0.238459	-0.0618497	0.196224	0.066492	0.178217	-0.0191077	0.159882	-0.145652	0.0733279	0.073119	-0.00706633	0.125168	0.0164948	0.0893408	-0.0477238	0.0392668	-0.0067894	0.00715319	-0.0675961	-0.0376506	-0.0723476	-0.105651	-0.111355	-0.151469	-0.12268	0.108375	-0.180774	0.0562094	-0.295475	0.00327843	-0.348128	-4.17335e-05	-0.363258	-0.0407502	0.484289	0.0520636
22	l	3	wls22rep1	0.283485	-0.0646091	0.248658	-0.0644638	0.188545	0.0712104	0.175196	-0.0145978	0.161727	-0.158934	0.0661503	0.0794937	-0.0105551	0.123754	0.0118216	0.0933859	-0.0506783	0.043415	-0.00980661	0.0148427	-0.0688545	-0.042102	-0.0732872	-0.108122	-0.111671	-0.159532	-0.111481	0.110914	-0.166211	0.0614483	-0.292351	0.00705445	-0.3497	0.00274037	-0.364381	-0.0486333	0.473394	0.0527352
22	l	4	wls22rep3	0.281063	-0.0632433	0.245005	-0.0620792	0.184696	0.0655474	0.175365	-0.0152824	0.163302	-0.144105	0.0726924	0.0749856	-0.00591206	0.125259	0.0132206	0.0955421	-0.0480303	0.0418192	-0.00693993	0.0119463	-0.0687437	-0.0396107	-0.0754546	-0.103619	-0.106635	-0.153118	-0.12129	0.107303	-0.183092	0.0557463	-0.301552	0.00469941	-0.343006	-0.000127383	-0.359028	-0.0457522	0.484339	0.0440892
22	l	5	wls22rep2	0.275931	-0.0598327	0.238491	-0.0599509	0.194862	0.0634895	0.179061	-0.0159858	0.157032	-0.145618	0.0732291	0.0747529	-0.0080615	0.125359	0.0155412	0.0895747	-0.0481225	0.0372612	-0.00715788	0.00521275	-0.0670341	-0.0383411	-0.0716925	-0.106327	-0.111477	-0.153501	-0.118428	0.110668	-0.179453	0.0566545	-0.297533	0.00396893	-0.347997	0.00104576	-0.3626	-0.0418391	0.485409	0.0534083
22	l	6	wls22rep4	0.27989	-0.0616617	0.24555	-0.0617374	0.201941	0.0662625	0.176062	-0.0162955	0.158329	-0.150482	0.0716234	0.0781587	-0.00271656	0.12459	0.0233556	0.0915205	-0.0586688	0.0431079	-0.0184185	0.012702	-0.0709732	-0.0346476	-0.0772337	-0.105046	-0.103777	-0.151129	-0.115305	0.104614	-0.16687	0.0621079	-0.297248	0.0018392	-0.353521	-0.00184626	-0.365526	-0.0508861	0.473506	0.0488289
22	l	7	wls22rep3	0.279479	-0.0613862	0.243175	-0.0637966	0.185659	0.0656513	0.175639	-0.0165451	0.163201	-0.14321	0.0736517	0.0749317	-0.00582074	0.123731	0.0139087	0.0918791	-0.0478181	0.0402387	-0.00724577	0.0125896	-0.067612	-0.0398535	-0.0769527	-0.102259	-0.105897	-0.151241	-0.120916	0.109138	-0.183445	0.0561389	-0.301823	0.00493018	-0.343267	4.55797e-05	-0.360027	-0.046958	0.486111	0.0459752
22	l	8	wls22rep5	0.276657	-0.0606266	0.243191	-0.060985	0.185247	0.0685673	0.173947	-0.0149726	0.158697	-0.143785	0.0695949	0.0753176	-0.00104151	0.122043	0.0195524	0.0904645	-0.0541271	0.0424116	-0.00433878	0.00287248	-0.0667862	-0.0369319	-0.0695941	-0.10731	-0.109094	-0.153617	-0.118288	0.108591	-0.180164	0.0562399	-0.295708	0.00512387	-0.35012	0.00149216	-0.364519	-0.0436753	0.486894	0.0487802
22	l	9	wls22rep4	0.28025	-0.0611104	0.243103	-0.063065	0.202678	0.0665288	0.176001	-0.0171063	0.161642	-0.151086	0.0700596	0.0801002	-0.00421788	0.123004	0.0225187	0.0913502	-0.0606687	0.043955	-0.0184437	0.0141612	-0.0724584	-0.0356864	-0.0793529	-0.103741	-0.103383	-0.154695	-0.109903	0.108405	-0.167182	0.0622457	-0.297246	0.00230639	-0.352788	-0.00343147	-0.364035	-0.0509637	0.473426	0.0488299
22	l	10	wls22rep5	0.277884	-0.0606818	0.243084	-0.0603045	0.183899	0.0663286	0.174649	-0.0164052	0.156562	-0.143592	0.0705572	0.0773038	-0.00203376	0.123337	0.0171229	0.0925019	-0.0516573	0.0403479	-0.00331802	0.00502038	-0.0643546	-0.0388676	-0.0720711	-0.108389	-0.107357	-0.153253	-0.118442	0.107896	-0.180263	0.055668	-0.29496	0.00609662	-0.350677	0.00322057	-0.365125	-0.0453471	0.486502	0.0491197
23	l	1	wls23rep1	0.279842	-0.0547725	0.247905	-0.0567679	0.181707	0.065115	0.175116	-0.0150777	0.157469	-0.15415	0.0764193	0.0809935	-0.0076537	0.126399	0.0268785	0.0952168	-0.0443095	0.0436025	-0.0103499	0.0105389	-0.0784107	-0.0410585	-0.0931915	-0.104993	-0.122393	-0.165197	-0.0978399	0.118535	-0.162778	0.070077	-0.287759	0.000751629	-0.354086	-0.00762749	-0.362672	-0.0590019	0.476107	0.0474171
23	l	2	wls23rep2	0.276911	-0.0538687	0.243782	-0.0607667	0.196035	0.0671273	0.169601	-0.0142666	0.153466	-0.151248	0.076162	0.0790246	-0.00393171	0.125562	0.0242422	0.0934986	-0.0386952	0.0394963	-0.00282124	0.00797817	-0.0745939	-0.0430205	-0.0826444	-0.108561	-0.115995	-0.156824	-0.116867	0.110243	-0.170895	0.0650489	-0.288237	0.00308209	-0.357961	-7.24912e-05	-0.364175	-0.0532084	0.476618	0.0507762
23	l	3	wls23rep1	0.279533	-0.0561224	0.247015	-0.056824	0.182334	0.0655884	0.17689	-0.0138455	0.159087	-0.155797	0.0766109	0.0797128	-0.00852413	0.127657	0.0246661	0.0958472	-0.0458546	0.043165	-0.0119935	0.0101059	-0.0781453	-0.0419373	-0.0923642	-0.106999	-0.126603	-0.163338	-0.0973273	0.117434	-0.161612	0.0710137	-0.28774	0.00134135	-0.350855	-0.00692672	-0.361991	-0.0594633	0.476873	0.0493874
23	l	4	wls23rep3	0.284466	-0.0562526	0.246755	-0.058374	0.196695	0.068311	0.170012	-0.0132221	0.155924	-0.150786	0.0757945	0.0771499	-0.00905025	0.12403	0.0190941	0.0892402	-0.0393411	0.0415707	-0.00175979	0.00730976	-0.0741274	-0.0382339	-0.083427	-0.105689	-0.105077	-0.147653	-0.123445	0.107772	-0.175639	0.0655452	-0.290111	0.00526876	-0.353845	0.000227538	-0.358368	-0.04877	0.481201	0.0483076
23	l	5	wls23rep2	0.28028	-0.054561	0.24425	-0.0584617	0.194871	0.0687575	0.169562	-0.0160804	0.153346	-0.152911	0.0739339	0.0783766	-0.00604579	0.124923	0.024429	0.0916779	-0.0384821	0.0377757	-0.00089554	0.00684255	-0.074404	-0.0446316	-0.0824557	-0.104203	-0.112878	-0.155361	-0.115331	0.110857	-0.174654	0.0640118	-0.28718	0.00569938	-0.359803	-0.000332205	-0.364275	-0.0528315	0.475734	0.0504514
23	l	6	wls23rep4	0.28874	-0.0617951	0.253706	-0.0644947	0.176329	0.0691828	0.182887	-0.0221447	0.169833	-0.153161	0.0684708	0.0771209	-0.0110564	0.122107	0.00699956	0.0938292	-0.0457608	0.0451642	-0.00786079	0.0070837	-0.0728001	-0.0378922	-0.0877628	-0.099897	-0.107065	-0.151081	-0.120536	0.105826	-0.175878	0.0674444	-0.299589	0.00415041	-0.34318	-0.00166473	-0.352878	-0.0462549	0.477402	0.0464763
23	l	7	wls23rep3	0.280546	-0.054295	0.244516	-0.0581957	0.195137	0.0690234	0.169828	-0.0158144	0.153612	-0.152645	0.0741999	0.0786426	-0.00577981	0.125189	0.0246949	0.0919439	-0.0382161	0.0380417	-0.000629551	0.00710854	-0.074138	-0.0443656	-0.0821897	-0.103937	-0.112612	-0.155095	-0.115065	0.111123	-0.174388	0.0642778	-0.286914	0.00596537	-0.359537	-6.62163e-05	-0.364009	-0.0525656	0.476	0.0507174
23	l	8	wls23rep5	0.280895	-0.0599235	0.251819	-0.0626885	0.178225	0.0677742	0.174733	-0.0188917	0.160318	-0.149345	0.07415	0.0779911	-0.00467975	0.122462	0.00880885	0.0952444	-0.0533012	0.0432359	0.0011592	0.00818417	-0.0685815	-0.0428735	-0.0838149	-0.102999	-0.112022	-0.150107	-0.112946	0.106296	-0.171297	0.0588358	-0.295033	0.0026405	-0.351835	0.00058913	-0.359951	-0.0462837	0.483353	0.0498598
23	l	9	wls23rep4	0.286775	-0.0612704	0.25125	-0.0656537	0.17763	0.0669198	0.182841	-0.0220439	0.169087	-0.154623	0.0681743	0.075532	-0.0106659	0.122317	0.0050624	0.0928372	-0.045967	0.0437774	-0.00658146	0.0108989	-0.0720368	-0.0356673	-0.0863916	-0.10158	-0.106952	-0.150411	-0.120039	0.106212	-0.177108	0.0684841	-0.299554	0.00317656	-0.342572	-0.000832055	-0.352852	-0.0470926	0.4799	0.0490193
23	l	10	wls23rep5	0.283258	-0.0607003	0.254836	-0.0616096	0.17585	0.0695169	0.176157	-0.0167971	0.158783	-0.14831	0.0710881	0.0784271	-0.00585873	0.122562	0.00926324	0.0945962	-0.0530888	0.0428182	0.00125218	0.00752724	-0.0687295	-0.0432682	-0.0848957	-0.105097	-0.111571	-0.152792	-0.111446	0.103735	-0.171454	0.0630639	-0.2951	0.00319432	-0.351936	0.0013744	-0.358511	-0.0461668	0.482104	0.0479267
24	l	1	wls24rep1	0.285312	-0.0618877	0.247199	-0.0611292	0.190614	0.0684506	0.180163	-0.0180266	0.15969	-0.148073	0.0646204	0.0790835	-0.00779172	0.123264	0.0131139	0.0924169	-0.0541242	0.0401088	-0.00841458	0.0128864	-0.0736692	-0.0402476	-0.0817979	-0.104404	-0.102818	-0.14921	-0.122223	0.105784	-0.186399	0.0580214	-0.288373	0.00621988	-0.342529	0.00202493	-0.357844	-0.0486493	0.485272	0.0433662
24	l	2	wls24rep2	0.282946	-0.0615352	0.246923	-0.0649824	0.182724	0.0671495	0.188684	-0.0256406	0.166048	-0.14624	0.0752151	0.0742301	-0.00842423	0.121064	0.013177	0.0911204	-0.0586595	0.043174	-0.0129891	0.0119362	-0.0744972	-0.0337802	-0.0801648	-0.0977248	-0.105931	-0.148703	-0.117669	0.10614	-0.175853	0.0600599	-0.29648	0.00266806	-0.347417	-0.00183536	-0.358354	-0.046371	0.48072	0.049271
24	l	3	wls24rep1	0.287017	-0.0612799	0.248869	-0.0605182	0.190835	0.0686047	0.180948	-0.0193569	0.160447	-0.149519	0.0653063	0.0778492	-0.00857546	0.121497	0.0111909	0.0934322	-0.0541268	0.0402533	-0.00862759	0.00961198	-0.073695	-0.0401747	-0.0838201	-0.103561	-0.104863	-0.148406	-0.122612	0.110789	-0.186521	0.0581908	-0.289418	0.00436427	-0.340812	0.00132558	-0.355316	-0.0474089	0.483774	0.0443063
24	l	4	wls24rep3	0.284421	-0.0608565	0.24887	-0.0637044	0.182125	0.0666968	0.180334	-0.0160551	0.164341	-0.148088	0.0685781	0.0752259	-0.00405908	0.121496	0.0144949	0.0935167	-0.0516653	0.0392837	-0.0139647	0.0120477	-0.0760274	-0.0408042	-0.0867788	-0.100335	-0.103715	-0.151677	-0.118217	0.108139	-0.17618	0.0566683	-0.284757	0.0063993	-0.345599	0.000735438	-0.365959	-0.0471982	0.483756	0.0485085
24	l	5	wls24rep2	0.281956	-0.0601196	0.248014	-0.0630799	0.183635	0.0657365	0.189042	-0.0249461	0.164212	-0.145897	0.076193	0.0729381	-0.0086013	0.120655	0.0137647	0.0919564	-0.0576459	0.0420547	-0.0145448	0.0124026	-0.0743754	-0.0360934	-0.0813683	-0.0991857	-0.105926	-0.150917	-0.118247	0.107931	-0.177265	0.0606895	-0.295828	0.0039122	-0.346299	-0.00259472	-0.357725	-0.0450284	0.481007	0.0495861
24	l	6	wls24rep4	0.283631	-0.0621036	0.249528	-0.0627457	0.182932	0.0676139	0.180013	-0.0201129	0.157521	-0.152219	0.0693677	0.0791075	-0.00985771	0.126608	0.0163317	0.0916056	-0.0383359	0.0397864	-0.0089126	0.0174974	-0.0781481	-0.039158	-0.0858033	-0.106769	-0.11442	-0.156091	-0.116649	0.112834	-0.175199	0.0581095	-0.285244	0.00731908	-0.347624	-0.00174009	-0.35963	-0.0513715	0.480501	0.0518287
24	l	7	wls24rep3	0.284282	-0.0626881	0.248772	-0.0621301	0.181405	0.0666913	0.181701	-0.0186632	0.161659	-0.145061	0.0687003	0.0765393	-0.0045351	0.124764	0.0147026	0.0913732	-0.0513553	0.0406117	-0.0130117	0.0113822	-0.0763221	-0.0441467	-0.0870509	-0.100181	-0.104624	-0.15282	-0.117831	0.109345	-0.176371	0.0565637	-0.28545	0.00496656	-0.343478	0.00134888	-0.365838	-0.0472106	0.484645	0.0493149
24	l	8	wls24rep5	0.281572	-0.0593268	0.250797	-0.0604406	0.177645	0.0658213	0.185477	-0.0205347	0.162446	-0.14535	0.0754856	0.0717681	-0.011023	0.118301	0.0113032	0.0883677	-0.0512619	0.0401355	-0.00832822	0.00775836	-0.072378	-0.0374827	-0.0797114	-0.0993043	-0.109115	-0.14822	-0.114723	0.104831	-0.169508	0.0619555	-0.290939	0.00760483	-0.351897	0.0011941	-0.368456	-0.0480534	0.482615	0.0509748
24	l	9	wls24rep4	0.285011	-0.0611312	0.247515	-0.0612931	0.184294	0.0685426	0.178875	-0.0174229	0.159328	-0.1534	0.0677325	0.0783586	-0.0102322	0.124958	0.0155765	0.0921024	-0.0378078	0.0394026	-0.0113958	0.0154772	-0.0788575	-0.0386651	-0.0856199	-0.105006	-0.113448	-0.158602	-0.115254	0.113682	-0.175043	0.0598247	-0.286808	0.00649242	-0.347041	-0.00219501	-0.358158	-0.050561	0.481335	0.0494367
24	l	10	wls24rep5	0.279678	-0.0582869	0.248354	-0.0626566	0.180488	0.065186	0.186167	-0.0213048	0.159824	-0.145265	0.0731609	0.0714999	-0.00988111	0.117392	0.0118026	0.0916762	-0.0503835	0.0414857	-0.00963793	0.00885137	-0.0709255	-0.0401489	-0.0785745	-0.0997622	-0.108852	-0.149758	-0.115774	0.105808	-0.171671	0.0639447	-0.290239	0.00588733	-0.352276	0.000424058	-0.365849	-0.0472406	0.484589	0.0522671
25	l	1	wls25rep1	0.279071	-0.0583274	0.243936	-0.0620581	0.179318	0.0676507	0.179537	-0.0209277	0.156238	-0.140849	0.078559	0.0762766	-0.00156287	0.123134	0.0226485	0.0933645	-0.0432534	0.0399895	-0.00104455	0.00836749	-0.0700646	-0.0414486	-0.0809097	-0.104479	-0.11199	-0.148738	-0.10848	0.109351	-0.173939	0.062655	-0.302132	0.00062225	-0.353435	-0.00406195	-0.369863	-0.0499512	0.477366	0.0494296
25	l	2	wls25rep2	0.278897	-0.0580409	0.243803	-0.0617016	0.178222	0.0687039	0.180324	-0.0192226	0.158126	-0.139695	0.0807226	0.0739442	-0.000267964	0.124973	0.0231002	0.0939111	-0.0402325	0.0392169	0.000572754	0.00831784	-0.0684429	-0.0413039	-0.079163	-0.100896	-0.111262	-0.149661	-0.110619	0.108296	-0.174562	0.0643589	-0.30216	0.000601267	-0.351888	-0.00140684	-0.371178	-0.0490239	0.477874	0.0504955
25	l	3	wls25rep1	0.279572	-0.0589074	0.243952	-0.0605123	0.180241	0.0670919	0.180496	-0.0180194	0.155994	-0.142328	0.0796534	0.0759204	-0.00024572	0.122878	0.0231084	0.0918138	-0.041519	0.0379055	0.000783067	0.00957333	-0.0674804	-0.0387307	-0.0807142	-0.105505	-0.111085	-0.148343	-0.112404	0.10904	-0.176576	0.0617983	-0.304704	0.000135726	-0.353895	-0.00390067	-0.369639	-0.048397	0.474462	0.0484861
25	l	4	wls25rep3	0.279071	-0.0583274	0.243936	-0.0620581	0.179318	0.0676507	0.179537	-0.0209277	0.156238	-0.140849	0.078559	0.0762766	-0.00156287	0.123134	0.0226485	0.0933645	-0.0432534	0.0399895	-0.00104455	0.00836749	-0.0700646	-0.0414486	-0.0809097	-0.104479	-0.11199	-0.148738	-0.10848	0.109351	-0.173939	0.062655	-0.302132	0.00062225	-0.353435	-0.00406195	-0.369863	-0.0499512	0.477366	0.0494296
25	l	5	wls25rep2	0.278897	-0.0580409	0.243803	-0.0617016	0.178222	0.0687039	0.180324	-0.0192226	0.158126	-0.139695	0.0807226	0.0739442	-0.000267964	0.124973	0.0231002	0.0939111	-0.0402325	0.0392169	0.000572754	0.00831784	-0.0684429	-0.0413039	-0.079163	-0.100896	-0.111262	-0.149661	-0.110619	0.108296	-0.174562	0.0643589	-0.30216	0.000601267	-0.351888	-0.00140684	-0.371178	-0.0490239	0.477874	0.0504955
25	l	6	wls25rep4	0.279521	-0.0574162	0.244428	-0.061077	0.178847	0.0693285	0.180949	-0.018598	0.158751	-0.13907	0.0813472	0.0745688	0.000356639	0.125598	0.0237248	0.0945357	-0.0396079	0.0398415	0.00119736	0.00894244	-0.0678183	-0.0406793	-0.0785384	-0.100272	-0.110638	-0.149036	-0.109995	0.10892	-0.173937	0.0649835	-0.301535	0.00122587	-0.351263	-0.000782238	-0.370553	-0.0483993	0.478499	0.0511201
25	l	7	wls25rep3	0.280146	-0.0567916	0.245053	-0.0604524	0.179471	0.0699532	0.181573	-0.0179734	0.159376	-0.138445	0.0819718	0.0751934	0.000981242	0.126222	0.0243494	0.0951603	-0.0389833	0.0404661	0.00182196	0.00956704	-0.0671937	-0.0400547	-0.0779138	-0.0996472	-0.110013	-0.148411	-0.10937	0.109545	-0.173312	0.0656081	-0.30091	0.00185047	-0.350639	-0.000157635	-0.369929	-0.0477747	0.479123	0.0517447
25	l	8	wls25rep5	0.279945	-0.0574536	0.24481	-0.0611843	0.180191	0.0685244	0.180411	-0.020054	0.157112	-0.139975	0.0794327	0.0771503	-0.000689118	0.124008	0.0235223	0.0942382	-0.0423796	0.0408632	-0.000170791	0.00924125	-0.0691908	-0.0405748	-0.0800359	-0.103606	-0.111116	-0.147864	-0.107606	0.110225	-0.173065	0.0635288	-0.301258	0.001496	-0.352561	-0.00318819	-0.368989	-0.0490774	0.47824	0.0503034
25	l	9	wls25rep4	0.279521	-0.0574162	0.244428	-0.061077	0.178847	0.0693285	0.180949	-0.018598	0.158751	-0.13907	0.0813472	0.0745688	0.000356639	0.125598	0.0237248	0.0945357	-0.0396079	0.0398415	0.00119736	0.00894244	-0.0678183	-0.0406793	-0.0785384	-0.100272	-0.110638	-0.149036	-0.109995	0.10892	-0.173937	0.0649835	-0.301535	0.00122587	-0.351263	-0.000782238	-0.370553	-0.0483993	0.478499	0.0511201
25	l	10	wls25rep5	0.278897	-0.0580409	0.243803	-0.0617016	0.178222	0.0687039	0.180324	-0.0192226	0.158126	-0.139695	0.0807226	0.0739442	-0.000267964	0.124973	0.0231002	0.0939111	-0.0402325	0.0392169	0.000572754	0.00831784	-0.0684429	-0.0413039	-0.079163	-0.100896	-0.111262	-0.149661	-0.110619	0.108296	-0.174562	0.0643589	-0.30216	0.000601267	-0.351888	-0.00140684	-0.371178	-0.0490239	0.477874	0.0504955
26	l	1	wls26rep1	0.280253	-0.0611637	0.24634	-0.0625919	0.182025	0.0676849	0.181724	-0.0187065	0.165641	-0.143469	0.0849141	0.0762314	-0.0023869	0.117922	0.0166412	0.0940684	-0.056513	0.040859	-0.00447954	0.00535263	-0.0715146	-0.0407664	-0.0831	-0.100089	-0.105651	-0.154892	-0.116107	0.103189	-0.167679	0.0635176	-0.303042	0.0070638	-0.355781	0.00504776	-0.363376	-0.0507807	0.472093	0.0515222
26	l	2	wls26rep2	0.286639	-0.0608924	0.254656	-0.0615953	0.178536	0.0644664	0.184112	-0.0207382	0.165929	-0.151009	0.0675406	0.0740531	-0.0212801	0.117732	-0.00211954	0.096006	-0.092018	0.0591997	-0.00319699	0.00435598	-0.0663001	-0.0402973	-0.074057	-0.10284	-0.0966056	-0.151847	-0.0983037	0.105195	-0.148762	0.0698039	-0.301024	0.00520513	-0.35062	-0.000278025	-0.363721	-0.0488583	0.480597	0.0423379
26	l	3	wls26rep1	0.280148	-0.0595766	0.248081	-0.0611259	0.183627	0.0673857	0.181305	-0.0208051	0.163568	-0.141778	0.0844552	0.0742219	-0.00450665	0.119831	0.0143997	0.0940866	-0.0534662	0.0367343	-0.00276101	0.00879801	-0.0773315	-0.0368193	-0.0818481	-0.102303	-0.102429	-0.155397	-0.116695	0.101248	-0.170052	0.0635624	-0.303394	0.0107157	-0.354686	0.00297387	-0.362171	-0.051021	0.473757	0.0492685
26	l	4	wls26rep3	0.287741	-0.0612315	0.249828	-0.0615593	0.194593	0.0659675	0.185392	-0.0173204	0.159628	-0.150159	0.0663976	0.0786114	-0.0120785	0.122439	0.00562243	0.0980255	-0.0648006	0.0402524	-0.0115736	0.00682085	-0.0796228	-0.0416071	-0.0896866	-0.104765	-0.114657	-0.14821	-0.113722	0.106436	-0.173343	0.0598482	-0.285439	0.00269029	-0.340696	-0.00318734	-0.350675	-0.0424788	0.487091	0.0494282
26	l	5	wls26rep2	0.288055	-0.0599379	0.250238	-0.061692	0.175824	0.066061	0.180023	-0.0172132	0.163303	-0.151737	0.0664043	0.0751955	-0.0245294	0.119089	-0.0113358	0.0945328	-0.04188	0.0671734	-0.00407854	0.00704927	-0.0677954	-0.0414675	-0.0775673	-0.105707	-0.0997981	-0.153033	-0.0977249	0.107665	-0.154826	0.065636	-0.305231	0.00217301	-0.354363	0.000248877	-0.364304	-0.0526787	0.479585	0.0386429
26	l	6	wls26rep4	0.285927	-0.0624635	0.246699	-0.0596294	0.182575	0.0646407	0.174755	-0.0153489	0.155482	-0.152017	0.0786817	0.0764921	-0.00734852	0.12693	0.0174142	0.0943903	-0.0537995	0.0421156	-0.00697425	0.00585538	-0.0732721	-0.0396873	-0.080141	-0.102819	-0.11487	-0.151794	-0.112213	0.110584	-0.168103	0.0595071	-0.300628	0.00244819	-0.346618	-0.00113986	-0.358669	-0.0501589	0.481103	0.052095
26	l	7	wls26rep3	0.287844	-0.0621271	0.246257	-0.0616623	0.192497	0.0649953	0.188756	-0.0214666	0.158862	-0.149062	0.0667887	0.0785411	-0.0117305	0.122009	0.00743608	0.0953636	-0.0668622	0.0444198	-0.0145286	0.00750447	-0.0822909	-0.0411023	-0.0897701	-0.1028	-0.113607	-0.150474	-0.112224	0.109385	-0.170179	0.060313	-0.288425	0.000491695	-0.33704	-0.00324918	-0.351058	-0.0434522	0.489274	0.0523725
26	l	8	wls26rep5	0.279274	-0.0517294	0.236318	-0.0550952	0.194292	0.0668865	0.181857	-0.018167	0.16361	-0.142918	0.0830037	0.0715861	-0.00517594	0.115377	0.0217416	0.088269	-0.0491952	0.0387982	-0.0058132	0.00542648	-0.0686446	-0.0413701	-0.0839839	-0.106694	-0.107355	-0.147686	-0.113001	0.104117	-0.172051	0.05677	-0.305674	0.00102535	-0.355927	0.000648661	-0.369017	-0.0360585	0.475743	0.0508139
26	l	9	wls26rep4	0.285683	-0.0627985	0.247981	-0.0620895	0.1824	0.0643761	0.172695	-0.0153036	0.155487	-0.150443	0.0785063	0.07629	-0.00750008	0.126782	0.019083	0.0939145	-0.050329	0.0413677	-0.00504883	0.00722576	-0.0732158	-0.0379695	-0.0822715	-0.102628	-0.113668	-0.154046	-0.112382	0.110498	-0.168306	0.0594504	-0.300873	0.00246641	-0.348706	-0.000783546	-0.35895	-0.05011	0.479415	0.0538007
26	l	10	wls26rep5	0.278259	-0.0522988	0.23918	-0.0561173	0.197549	0.0656168	0.180913	-0.0204934	0.161113	-0.140809	0.0814964	0.0751574	-0.0068975	0.11526	0.0217667	0.0878873	-0.0528472	0.0392753	-0.00589854	0.00533979	-0.0648944	-0.0417427	-0.0838236	-0.104407	-0.105899	-0.149275	-0.115005	0.100511	-0.173437	0.057194	-0.302487	0.00511272	-0.357203	-0.000236655	-0.368456	-0.0370903	0.476571	0.051116
27	l	1	wls27rep1	0.280538	-0.0582401	0.244945	-0.057753	0.182419	0.0652969	0.187568	-0.0204211	0.155437	-0.146612	0.0732669	0.0729307	-0.00396228	0.122241	0.0176385	0.0929552	-0.0540764	0.0414351	-0.00265274	0.011079	-0.070389	-0.0394564	-0.0781171	-0.107245	-0.109053	-0.152903	-0.114361	0.107606	-0.171145	0.0640013	-0.297769	0.00228079	-0.352858	-0.000364478	-0.365104	-0.0464675	0.477675	0.049636
27	l	2	wls27rep2	0.280954	-0.0568159	0.249182	-0.0558347	0.178203	0.0598946	0.181661	-0.0176021	0.162765	-0.144331	0.0739761	0.0660496	-0.00788077	0.121432	0.0189568	0.0873926	-0.0538104	0.0400405	-0.004112	0.00822204	-0.0729337	-0.0378404	-0.0825185	-0.102123	-0.100389	-0.146398	-0.119332	0.104258	-0.173193	0.0578425	-0.295633	0.0047542	-0.356045	0.00249685	-0.364456	-0.04131	0.484605	0.0498715
27	l	3	wls27rep1	0.279189	-0.0585371	0.245852	-0.056679	0.18341	0.0661019	0.186393	-0.020826	0.155753	-0.148959	0.0726901	0.0740837	-0.00440059	0.123269	0.0145809	0.0908802	-0.0508168	0.0418067	-0.00305561	0.0123307	-0.071039	-0.0399109	-0.0783277	-0.105781	-0.106017	-0.153944	-0.114572	0.108625	-0.171628	0.0633043	-0.29539	0.00483338	-0.351969	-0.00496412	-0.368328	-0.0444224	0.477676	0.0487886
27	l	4	wls27rep3	0.276816	-0.0588977	0.237986	-0.0602022	0.176946	0.068555	0.179018	-0.0205597	0.159894	-0.145611	0.0761042	0.0747748	-0.000494518	0.122055	0.0183224	0.0929564	-0.0375143	0.0393997	-0.000266664	0.00634836	-0.0733312	-0.0377304	-0.0834861	-0.103019	-0.103777	-0.152638	-0.11528	0.108135	-0.17361	0.0608961	-0.293415	0.0056442	-0.356728	-0.00196904	-0.370695	-0.0490901	0.483511	0.0509533
27	l	5	wls27rep2	0.282029	-0.0567035	0.250271	-0.0557736	0.177041	0.0582205	0.181161	-0.0155626	0.165875	-0.144632	0.076797	0.0655004	-0.00904554	0.119429	0.0165384	0.0893899	-0.0508805	0.0392997	-0.00115865	0.00757676	-0.0738102	-0.0398652	-0.0843108	-0.0983548	-0.102914	-0.14814	-0.118306	0.10365	-0.172066	0.057173	-0.297755	0.00629258	-0.356567	0.00183436	-0.364635	-0.0401289	0.481735	0.0507945
27	l	6	wls27rep4	0.279961	-0.0574464	0.244117	-0.0606196	0.171451	0.0688356	0.178629	-0.0197167	0.158257	-0.150021	0.0796172	0.0752122	-0.00150031	0.122496	0.0161643	0.0953257	-0.0433702	0.0404531	-0.00553527	0.0116993	-0.0722852	-0.0419402	-0.0803802	-0.111163	-0.102262	-0.163169	-0.115679	0.106674	-0.169754	0.0620138	-0.296433	0.00558812	-0.350642	0.00368615	-0.369479	-0.0414103	0.479122	0.053501
27	l	7	wls27rep3	0.277919	-0.0582945	0.236934	-0.0611158	0.176162	0.0691261	0.179843	-0.0220479	0.159537	-0.14467	0.0773368	0.0747568	-0.00210139	0.126266	0.0192388	0.0909585	-0.0411279	0.0422501	-0.000603241	0.00670856	-0.0734493	-0.0374223	-0.0801783	-0.105228	-0.102569	-0.15624	-0.115589	0.108092	-0.171883	0.0604427	-0.2932	0.00546437	-0.356381	-0.00225176	-0.371682	-0.0470805	0.481794	0.0502849
27	l	8	wls27rep5	0.288663	-0.061302	0.249251	-0.0617959	0.187212	0.0634627	0.190209	-0.0250899	0.157732	-0.144811	0.0669469	0.0717066	-0.0122607	0.12135	0.00139001	0.0927061	-0.0576296	0.0451227	-0.000747115	0.00693493	-0.0742763	-0.0380698	-0.0858779	-0.103431	-0.101208	-0.147536	-0.126992	0.108007	-0.177784	0.0645813	-0.291187	0.00605633	-0.344604	0.000558142	-0.352989	-0.046647	0.484152	0.0481969
27	l	9	wls27rep4	0.278492	-0.0581949	0.245027	-0.0579869	0.173767	0.0678743	0.175636	-0.0180583	0.163642	-0.151837	0.0767359	0.0772227	-0.00436499	0.124759	0.014436	0.0935893	-0.0395717	0.0396628	-0.00568551	0.00960313	-0.0723316	-0.042134	-0.0787976	-0.111732	-0.102012	-0.159825	-0.111808	0.106137	-0.171159	0.0642969	-0.298438	0.00630378	-0.351535	0.000606435	-0.369878	-0.040887	0.477844	0.0505996
27	l	10	wls27rep5	0.291921	-0.063902	0.251073	-0.0622529	0.185524	0.0634931	0.190631	-0.0234508	0.157849	-0.144812	0.0639354	0.073886	-0.0133424	0.123157	0.00390649	0.0939054	-0.0574983	0.0430999	-0.00038019	0.00676247	-0.0738191	-0.0381642	-0.0847759	-0.0998111	-0.103838	-0.154399	-0.126431	0.107726	-0.177164	0.0643701	-0.290424	0.00595054	-0.345259	0.00260497	-0.352153	-0.0466673	0.480245	0.0485034
28	l	1	wls28rep1	0.283976	-0.063915	0.254023	-0.0633346	0.18751	0.0688814	0.175332	-0.0169229	0.158149	-0.144917	0.0684579	0.0748115	-0.00768893	0.124453	0.0119241	0.0921891	-0.0609998	0.0396739	-0.0114398	0.0068284	-0.0734887	-0.0385509	-0.0793785	-0.103109	-0.102094	-0.149139	-0.112842	0.106822	-0.175637	0.0578411	-0.284674	0.00342405	-0.347495	-0.000444805	-0.367656	-0.0432456	0.484021	0.0486556
28	l	2	wls28rep2	0.276471	-0.0592267	0.246205	-0.060928	0.182834	0.0650508	0.183558	-0.0209084	0.167113	-0.145434	0.0670783	0.0792849	-0.0109062	0.125032	0.00790243	0.0960532	-0.052718	0.0404633	-0.00672572	0.00836781	-0.0682156	-0.0432741	-0.078853	-0.107725	-0.103051	-0.151979	-0.107859	0.11029	-0.174164	0.0617255	-0.294427	0.00623719	-0.353641	0.000639646	-0.362059	-0.0475871	0.481457	0.043918
28	l	3	wls28rep1	0.285258	-0.0630552	0.2517	-0.0617755	0.189654	0.065631	0.17437	-0.01765	0.159545	-0.144243	0.0681009	0.0775352	-0.009235	0.121663	0.0129702	0.0926579	-0.059508	0.0418367	-0.0106417	0.00545925	-0.0740565	-0.0378389	-0.0798529	-0.102408	-0.104304	-0.148101	-0.107476	0.10997	-0.17672	0.056606	-0.286052	0.000227109	-0.348499	-0.00193192	-0.368227	-0.042962	0.482973	0.0483801
28	l	4	wls28rep3	0.282395	-0.0579642	0.24219	-0.0562191	0.194406	0.06663	0.177465	-0.0168797	0.1531	-0.141416	0.0711867	0.0778657	-0.00391733	0.120924	0.0165375	0.091436	-0.0589597	0.040623	-0.00608268	0.00711209	-0.0702389	-0.0420688	-0.0791021	-0.101256	-0.104833	-0.15186	-0.10815	0.104781	-0.174086	0.0559229	-0.290446	0.00328678	-0.350423	-0.00244105	-0.374534	-0.0441318	0.483494	0.0456549
28	l	5	wls28rep2	0.279112	-0.0597887	0.245744	-0.0588634	0.185772	0.0663558	0.186083	-0.021456	0.16351	-0.148313	0.0676838	0.0792566	-0.0139137	0.125914	0.00799406	0.0942703	-0.0522362	0.0403534	-0.00618179	0.00823578	-0.0694802	-0.0430425	-0.0796683	-0.105814	-0.103008	-0.154078	-0.107019	0.111997	-0.176023	0.0602883	-0.294209	0.00601324	-0.351292	0.00170437	-0.361901	-0.0478934	0.479034	0.0448613
28	l	6	wls28rep4	0.282456	-0.0565533	0.245191	-0.0576407	0.179854	0.0682604	0.18568	-0.0208331	0.154186	-0.142849	0.0694376	0.0772229	-0.0104313	0.12164	0.00891102	0.0893831	-0.0498083	0.0394313	-0.00542554	0.00964358	-0.0711262	-0.0395167	-0.0819328	-0.103736	-0.104735	-0.148911	-0.112742	0.108459	-0.178638	0.0575542	-0.296171	0.00364727	-0.344313	0.000253048	-0.362071	-0.0472599	0.49168	0.0418052
28	l	7	wls28rep3	0.282256	-0.0574192	0.241361	-0.0593014	0.193983	0.0671877	0.17861	-0.0185479	0.156507	-0.141797	0.0738565	0.0758293	-0.00611203	0.123357	0.0161952	0.0935449	-0.0599544	0.0389924	-0.00664701	0.00730618	-0.0708039	-0.0420255	-0.0795901	-0.101292	-0.105276	-0.151993	-0.108975	0.104936	-0.174594	0.05771	-0.287758	0.00241714	-0.351046	-0.000980261	-0.37366	-0.0448592	0.481647	0.0469348
28	l	8	wls28rep5	0.282926	-0.0610013	0.243896	-0.0600134	0.19091	0.0719102	0.181266	-0.0209583	0.162816	-0.147054	0.0677509	0.0802291	-0.0123571	0.123917	0.00784508	0.0942373	-0.0652429	0.0443756	-0.00519801	0.00974797	-0.0665178	-0.0451008	-0.0840158	-0.104086	-0.103524	-0.149441	-0.110798	0.11258	-0.175609	0.0586588	-0.292624	0.0054661	-0.344929	-0.00125285	-0.360114	-0.0514899	0.48352	0.0392742
28	l	9	wls28rep4	0.283464	-0.0578464	0.24452	-0.0571537	0.182317	0.0720029	0.188352	-0.0191098	0.155334	-0.143221	0.0693667	0.0772094	-0.012706	0.121621	0.00878082	0.0909025	-0.0502986	0.0370321	-0.00720471	0.00927944	-0.0711582	-0.0405134	-0.081535	-0.103237	-0.106162	-0.150219	-0.113543	0.107769	-0.177686	0.0562248	-0.293429	0.00320023	-0.345219	-2.94313e-05	-0.36245	-0.0442698	0.489258	0.0403583
28	l	10	wls28rep5	0.282251	-0.0612229	0.245057	-0.0607023	0.190906	0.0731078	0.183855	-0.0239514	0.160692	-0.146618	0.0662953	0.081858	-0.0136261	0.125435	0.00827408	0.0953652	-0.059868	0.0424875	-0.0091402	0.00851352	-0.0663603	-0.0453908	-0.0850937	-0.102031	-0.10768	-0.152047	-0.109267	0.109706	-0.172534	0.0611367	-0.292394	0.00329334	-0.345393	0.000533895	-0.359256	-0.0517901	0.483283	0.042317
30	l	1	wls30rep1	0.287898	-0.0597621	0.253415	-0.0604084	0.18291	0.0706508	0.171332	-0.0128189	0.164238	-0.142165	0.0642225	0.0762609	-0.0110147	0.121093	0.00684913	0.0932714	-0.0479567	0.0375238	-0.00700617	0.0064995	-0.0732493	-0.0404237	-0.0826126	-0.107908	-0.104707	-0.162762	-0.117716	0.108744	-0.171533	0.0600982	-0.287209	0.00916912	-0.347536	0.00486911	-0.363313	-0.0436238	0.482988	0.041692
30	l	2	wls30rep2	0.285089	-0.05755	0.246368	-0.0592264	0.181543	0.0681535	0.17968	-0.0180959	0.155798	-0.147079	0.0633723	0.0749747	-0.00215502	0.123614	0.021343	0.0891962	-0.055586	0.0396087	-0.0102653	0.0094896	-0.0740559	-0.0421376	-0.0820971	-0.106274	-0.104122	-0.14901	-0.106346	0.109031	-0.175182	0.0620328	-0.286086	0.00426112	-0.354135	-0.000550666	-0.367353	-0.0484971	0.484189	0.0480594
30	l	3	wls30rep1	0.288784	-0.0625675	0.25096	-0.0610301	0.181629	0.0679702	0.17249	-0.0122903	0.163664	-0.143305	0.0633045	0.076871	-0.0118601	0.123351	0.00915215	0.0915051	-0.0506651	0.0380872	-0.00783079	0.00688477	-0.0760478	-0.0417653	-0.0794512	-0.106505	-0.100957	-0.157906	-0.114833	0.112042	-0.174648	0.0586261	-0.286759	0.00690516	-0.348424	0.00626149	-0.362814	-0.0461081	0.484308	0.0429735
30	l	4	wls30rep3	0.282688	-0.060787	0.246254	-0.0614315	0.196243	0.0673909	0.182738	-0.0214149	0.16021	-0.147727	0.0670397	0.0786852	-0.00564477	0.123332	0.0108665	0.0931694	-0.0566536	0.043547	-0.0116426	0.0108928	-0.0717304	-0.0412924	-0.0792785	-0.105731	-0.108629	-0.156774	-0.11611	0.108099	-0.171567	0.0650792	-0.289654	0.00647566	-0.347819	-0.00184072	-0.363372	-0.0483471	0.476063	0.048674
30	l	5	wls30rep2	0.285045	-0.057649	0.246069	-0.0611424	0.179621	0.0664887	0.179805	-0.0180856	0.157343	-0.149065	0.0662168	0.0785081	-0.00380091	0.122155	0.019917	0.0896134	-0.0567081	0.0420644	-0.00861205	0.00570071	-0.0718206	-0.0420307	-0.0818201	-0.105793	-0.104471	-0.1522	-0.109482	0.109905	-0.173976	0.0662173	-0.285431	0.00491768	-0.35371	-0.00166577	-0.366688	-0.0476675	0.482503	0.0497298
30	l	6	wls30rep4	0.281885	-0.0570724	0.24564	-0.0557588	0.184452	0.0637805	0.180376	-0.0161156	0.14917	-0.146424	0.0712467	0.0743603	-0.00367615	0.123571	0.0238492	0.0874594	-0.0450825	0.0394423	-0.00613031	0.0126213	-0.0698735	-0.0383279	-0.077333	-0.106033	-0.104829	-0.158296	-0.117875	0.109371	-0.173494	0.0606769	-0.295646	0.00576251	-0.352203	0.00143835	-0.369723	-0.0489311	0.479246	0.0484745
30	l	7	wls30rep3	0.281492	-0.0599794	0.24482	-0.0623802	0.193342	0.0670348	0.181358	-0.0220406	0.160185	-0.148649	0.0677697	0.0785206	-0.00468344	0.125438	0.0134623	0.0930812	-0.0581756	0.0439952	-0.0111443	0.0128327	-0.0717173	-0.0411006	-0.0814397	-0.105443	-0.109144	-0.156628	-0.113842	0.106645	-0.173544	0.0622223	-0.288262	0.00364748	-0.347939	0.00143133	-0.36215	-0.049069	0.479612	0.0504418
30	l	8	wls30rep5	0.281154	-0.0573227	0.256278	-0.0603382	0.179423	0.0638918	0.17234	-0.0171809	0.165194	-0.150641	0.065719	0.0768378	-0.00999866	0.12413	0.0126332	0.0938627	-0.0549686	0.0405118	-0.0105815	0.00633549	-0.073256	-0.0404172	-0.0831713	-0.106008	-0.102848	-0.153002	-0.107674	0.111738	-0.174948	0.0602012	-0.293455	0.00476732	-0.344685	0.000873208	-0.362218	-0.044634	0.485063	0.0463932
30	l	9	wls30rep4	0.284674	-0.0561683	0.2459	-0.0582213	0.181706	0.0655551	0.175849	-0.013899	0.153662	-0.147736	0.0737987	0.0731075	-0.00257132	0.124413	0.0231053	0.0887212	-0.042377	0.0381347	-0.00750094	0.0102442	-0.0722639	-0.0366453	-0.0763251	-0.106849	-0.105239	-0.156871	-0.118842	0.108648	-0.172515	0.0596035	-0.294491	0.00465134	-0.352832	0.000646129	-0.371421	-0.0456276	0.477682	0.0482925
30	l	10	wls30rep5	0.281575	-0.0575389	0.254915	-0.0602032	0.177092	0.0679013	0.174725	-0.0176765	0.165338	-0.152466	0.0661635	0.0748457	-0.0112409	0.122477	0.0131508	0.0918965	-0.0537678	0.0422811	-0.00913182	0.00991475	-0.0724302	-0.0403533	-0.0841998	-0.105536	-0.106031	-0.153946	-0.109146	0.108371	-0.172115	0.059913	-0.292675	0.00315717	-0.345335	0.00144717	-0.362561	-0.0421852	0.485675	0.0477009
31	l	1	wls31rep1	0.285089	-0.0582594	0.241381	-0.0617327	0.184041	0.0667184	0.176254	-0.0197798	0.15496	-0.147151	0.0731901	0.077806	-0.00155234	0.122137	0.0196629	0.0924036	-0.0535433	0.0384097	-0.0167975	0.010956	-0.071112	-0.0436292	-0.0776806	-0.105944	-0.103512	-0.149892	-0.113454	0.106959	-0.173547	0.0592429	-0.294796	0.00352343	-0.35116	0.00113711	-0.363215	-0.0448558	0.485791	0.0519503
31	l	2	wls31rep2	0.281689	-0.0590677	0.24913	-0.0596269	0.195089	0.0662533	0.177068	-0.0167704	0.148105	-0.1507	0.0716062	0.0743648	-0.00981483	0.125128	0.0203297	0.0896237	-0.0452958	0.0428152	-0.00884739	0.0100102	-0.0754599	-0.0379656	-0.0843266	-0.100658	-0.109751	-0.147352	-0.113683	0.106631	-0.183075	0.052992	-0.287562	0.00292049	-0.35015	-0.00233262	-0.360467	-0.0477577	0.485416	0.0514937
31	l	3	wls31rep3	0.281597	-0.0603323	0.244884	-0.0615297	0.187357	0.0668305	0.170573	-0.0136329	0.15467	-0.144388	0.074053	0.073502	-0.00768252	0.123608	0.0153832	0.0925076	-0.0550251	0.0438452	-0.00487876	0.0087292	-0.0663697	-0.0360619	-0.0822122	-0.104994	-0.109118	-0.152614	-0.116714	0.109119	-0.175597	0.0595153	-0.295824	0.00112469	-0.346908	-0.00449907	-0.358737	-0.0463517	0.490549	0.0456226
31	l	4	wls31rep4	0.280798	-0.0603732	0.24672	-0.0598063	0.192537	0.0669758	0.174355	-0.0144739	0.161169	-0.14784	0.0772631	0.0710905	-0.00601516	0.119363	0.0133921	0.0913877	-0.0585357	0.0440714	-0.00479729	0.00993918	-0.0684766	-0.0387151	-0.0778542	-0.096481	-0.106125	-0.146503	-0.122633	0.106171	-0.177263	0.057508	-0.294994	0.00331714	-0.352504	-0.00194782	-0.360275	-0.0479981	0.483239	0.0443142
31	l	5	wls31rep5	0.28226	-0.059031	0.246096	-0.0602068	0.178042	0.0653351	0.186745	-0.01966	0.159731	-0.145354	0.0754866	0.0759843	-0.00884614	0.121338	0.0143159	0.0922921	-0.0474978	0.0418599	-0.000464169	0.00614269	-0.067508	-0.0360977	-0.0778425	-0.102108	-0.105731	-0.148759	-0.123654	0.105124	-0.175034	0.0573186	-0.296122	0.0030627	-0.352417	-1.00251e-05	-0.366888	-0.0432846	0.479329	0.0460524
31	l	6	wls31rep3	0.286437	-0.0595803	0.255762	-0.0588905	0.180603	0.0686742	0.180469	-0.0141194	0.164592	-0.153287	0.0701481	0.0746404	-0.00806305	0.123877	0.0119202	0.0907741	-0.0525467	0.0408133	-0.00927092	0.00857268	-0.0692749	-0.0384787	-0.0791995	-0.103796	-0.105619	-0.156	-0.128701	0.108879	-0.185406	0.0592094	-0.286092	0.0110991	-0.337539	0.00461774	-0.356476	-0.0395392	0.484576	0.0488544
32	l	1	wls32rep1	0.28532	-0.0580587	0.244691	-0.0613118	0.181286	0.0683359	0.176289	-0.0167403	0.157161	-0.149061	0.0678566	0.0792551	-0.00233772	0.124087	0.0155028	0.0959499	-0.0471894	0.0411215	-0.00431616	0.00936678	-0.0749108	-0.0370194	-0.0844744	-0.10318	-0.109852	-0.152451	-0.11938	0.109972	-0.179766	0.0584621	-0.288458	0.00115329	-0.350802	-0.000788269	-0.354467	-0.0513713	0.487848	0.0422785
32	l	2	wls32rep2	0.283892	-0.0559766	0.243721	-0.0585843	0.180247	0.066553	0.176107	-0.0163384	0.155247	-0.149853	0.0709392	0.0773667	-0.00341789	0.124016	0.0131592	0.0949148	-0.0530916	0.0391387	-0.0200013	0.0117532	-0.0715391	-0.0420983	-0.078978	-0.106485	-0.0992803	-0.156697	-0.115819	0.108003	-0.170103	0.0617154	-0.296197	0.0055999	-0.351298	-0.000720092	-0.35468	-0.0456401	0.491092	0.0433317
32	l	3	wls32rep3	0.282233	-0.0606479	0.244192	-0.0596842	0.177739	0.0740288	0.174751	-0.0164962	0.157635	-0.151363	0.0673491	0.0784689	-0.00724693	0.125663	0.0157834	0.0931273	-0.0427335	0.0375134	-0.0156847	0.0101251	-0.0717375	-0.0365984	-0.0824293	-0.10841	-0.0986341	-0.156231	-0.115343	0.111782	-0.166112	0.06286	-0.29388	0.00323116	-0.35398	0.000362499	-0.359483	-0.0500516	0.487581	0.0423196
32	l	4	wls32rep4	0.281756	-0.0612702	0.243455	-0.0608555	0.179714	0.0671693	0.175706	-0.0161122	0.158616	-0.146109	0.062369	0.0835265	-0.00223359	0.12581	0.0138879	0.0969647	-0.0480555	0.0436555	-0.0175203	0.0137309	-0.0752446	-0.0367742	-0.0781778	-0.105645	-0.102508	-0.153749	-0.115416	0.108432	-0.178401	0.0589906	-0.290609	0.00119621	-0.346493	-0.00397995	-0.356064	-0.0514052	0.49522	0.0364246
32	l	5	wls32rep5	0.276211	-0.053503	0.24076	-0.0582238	0.186403	0.0641847	0.174172	-0.0186745	0.161456	-0.149173	0.0737373	0.0728229	-0.00593812	0.125017	0.0191042	0.0906868	-0.0448236	0.0345022	-0.0163748	0.0125788	-0.077364	-0.034806	-0.082143	-0.102087	-0.104522	-0.148815	-0.109363	0.104978	-0.173732	0.0598523	-0.298167	0.00391992	-0.35236	-0.00395238	-0.359611	-0.0470768	0.492555	0.0477691
32	l	6	wls32rep1	0.284062	-0.0596472	0.243423	-0.0628552	0.180673	0.0704593	0.177107	-0.0166734	0.156042	-0.148734	0.0672371	0.0815067	-0.00496743	0.124898	0.0182069	0.0959545	-0.0463442	0.0414478	-0.00375985	0.0078526	-0.0744174	-0.0384627	-0.0840565	-0.104624	-0.109493	-0.153875	-0.120518	0.108864	-0.180971	0.0574124	-0.287438	0.0035293	-0.350054	-0.000130484	-0.353777	-0.0507176	0.489044	0.0437956
32	l	7	wls32rep2	0.281785	-0.0575639	0.243689	-0.0586166	0.182449	0.0695738	0.174402	-0.0163049	0.157253	-0.149964	0.0713747	0.0787049	-0.00464464	0.125406	0.0132939	0.0926055	-0.0525716	0.0386817	-0.0197359	0.00959437	-0.0722948	-0.0386258	-0.0802848	-0.108234	-0.0987235	-0.15856	-0.11323	0.108934	-0.172921	0.0615339	-0.296721	0.00702239	-0.349917	0.000470079	-0.353668	-0.0479256	0.490465	0.0432679
32	l	8	wls32rep3	0.282383	-0.0590555	0.247686	-0.0620319	0.175418	0.0701561	0.174667	-0.0169108	0.156007	-0.151707	0.0671875	0.0796667	-0.00751526	0.126724	0.0136505	0.0925505	-0.0409027	0.0401649	-0.0157278	0.0111478	-0.0718281	-0.0374986	-0.0822531	-0.10754	-0.100429	-0.158882	-0.113799	0.1125	-0.166415	0.0617934	-0.295638	0.0056414	-0.354195	-0.00108314	-0.355864	-0.0499692	0.487568	0.0443332
32	l	9	wls32rep4	0.281223	-0.0571008	0.242474	-0.0585624	0.178182	0.0695902	0.175828	-0.016024	0.159093	-0.146401	0.0636618	0.0831697	-0.00299511	0.125712	0.016777	0.0961437	-0.0493791	0.03969	-0.0162154	0.0129538	-0.0774514	-0.0371556	-0.0798327	-0.104448	-0.104776	-0.156269	-0.116059	0.109705	-0.175531	0.0592468	-0.291366	0.00166294	-0.345615	-0.00404687	-0.355065	-0.0516209	0.497047	0.0337543
32	l	10	wls32rep5	0.279083	-0.0569478	0.240029	-0.0611207	0.18307	0.0672389	0.17222	-0.0175918	0.161003	-0.148237	0.0722748	0.0759104	-0.0059019	0.124434	0.0208523	0.0898278	-0.0429516	0.0356225	-0.0217803	0.0145628	-0.0743006	-0.0374181	-0.0810415	-0.104429	-0.105326	-0.150854	-0.108639	0.11006	-0.173781	0.0596951	-0.296723	0.00204729	-0.352256	-0.00185516	-0.358264	-0.0487825	0.492432	0.0478374
33	l	1	wls33rep1	0.282297	-0.0629125	0.245094	-0.0622429	0.180391	0.0684438	0.160023	-0.00931313	0.158628	-0.147094	0.080881	0.0783449	-0.00139417	0.123496	0.0155719	0.0935262	-0.0516191	0.0455434	-0.000166723	0.00777133	-0.0689765	-0.0381551	-0.0843691	-0.105308	-0.107005	-0.154829	-0.113341	0.106908	-0.174581	0.0619509	-0.297263	0.00189291	-0.351666	-0.000995962	-0.359596	-0.0522527	0.487093	0.0452269
33	l	2	wls33rep2	0.286924	-0.0610522	0.244763	-0.0602171	0.191805	0.0630256	0.183063	-0.0187114	0.163431	-0.150721	0.0813945	0.0785071	-0.0113676	0.1215	0.0129618	0.0913407	-0.0546216	0.0434548	-0.00868996	0.00914834	-0.0724477	-0.0373092	-0.0846953	-0.1003	-0.11394	-0.150447	-0.117814	0.10533	-0.177745	0.0603006	-0.288664	0.00235445	-0.347757	-0.000510668	-0.361889	-0.0467645	0.475287	0.0510704
33	l	3	wls33rep3	0.28628	-0.059505	0.247459	-0.0588374	0.191629	0.066914	0.181325	-0.0204138	0.154736	-0.151474	0.0805119	0.0791823	-0.0091083	0.121376	0.0160351	0.0932394	-0.056206	0.0473614	-0.00540576	0.00584565	-0.0689057	-0.0432857	-0.0862802	-0.105383	-0.118181	-0.154023	-0.114958	0.1087	-0.176359	0.0610859	-0.298493	0.00467895	-0.343325	0.00260181	-0.355641	-0.0510319	0.474889	0.0529688
33	l	4	wls33rep4	0.287538	-0.0592687	0.246796	-0.0635256	0.197375	0.0627903	0.179827	-0.0174286	0.157969	-0.149316	0.0777092	0.0738545	-0.011801	0.120288	0.00900541	0.0921201	-0.0584783	0.0440395	-0.0117153	0.00708722	-0.0729794	-0.0388747	-0.0805643	-0.10288	-0.106479	-0.150693	-0.117243	0.106821	-0.174046	0.063445	-0.296948	0.00557754	-0.345211	0.00143089	-0.358326	-0.0478977	0.477573	0.05243
33	l	5	wls33rep5	0.283203	-0.0632049	0.238677	-0.0611063	0.184572	0.0705058	0.182161	-0.0189382	0.157181	-0.152249	0.0744026	0.0811286	-0.00834015	0.123329	0.00852258	0.0972022	-0.0551389	0.0453233	-0.00105598	0.00930235	-0.0657356	-0.038609	-0.0778397	-0.103474	-0.105539	-0.153732	-0.116361	0.109124	-0.177458	0.0604418	-0.298711	0.00223257	-0.346193	-0.000655225	-0.358793	-0.0504182	0.482446	0.0437961
33	l	6	wls33rep1	0.284461	-0.0625876	0.243376	-0.0632489	0.182589	0.0670732	0.160256	-0.010407	0.158623	-0.148148	0.0778363	0.0796409	-0.00617466	0.125142	0.0180798	0.0942696	-0.0528477	0.0468574	0.00175629	0.00489352	-0.0687295	-0.0388446	-0.0805623	-0.106393	-0.108345	-0.151528	-0.11239	0.109927	-0.174353	0.0595802	-0.29872	0.00180758	-0.351498	-0.00304294	-0.359073	-0.0505998	0.485715	0.0456087
33	l	7	wls33rep2	0.288598	-0.0622088	0.246463	-0.0612874	0.192371	0.06582	0.181255	-0.0192828	0.161363	-0.151176	0.081461	0.0760779	-0.012578	0.123064	0.0134897	0.092673	-0.0543513	0.0431398	-0.0103309	0.00895612	-0.0703219	-0.0359252	-0.0847042	-0.100471	-0.114233	-0.152343	-0.117183	0.106924	-0.17737	0.0602294	-0.288543	0.000730956	-0.349224	8.73387e-07	-0.359815	-0.0465931	0.473654	0.0516715
33	l	8	wls33rep3	0.287121	-0.059809	0.246573	-0.0588403	0.189088	0.0669799	0.180867	-0.0186657	0.1558	-0.151559	0.0851045	0.0762992	-0.0124708	0.125298	0.0174423	0.0927323	-0.0567666	0.0454526	-0.00398659	0.00551321	-0.0709857	-0.0429237	-0.0847418	-0.105477	-0.118689	-0.155527	-0.113296	0.108206	-0.175818	0.0645974	-0.301921	0.00531339	-0.341553	0.000582672	-0.355376	-0.0508515	0.473607	0.0526779
33	l	9	wls33rep4	0.28242	-0.0608043	0.24607	-0.0624852	0.198298	0.0635872	0.180732	-0.016784	0.156625	-0.150216	0.0784085	0.0746499	-0.0112765	0.121153	0.00910533	0.0911723	-0.0544973	0.0438173	-0.0111697	0.00774241	-0.0725387	-0.0383159	-0.0801262	-0.102441	-0.10608	-0.150348	-0.121377	0.10505	-0.176045	0.0628793	-0.2974	0.00441337	-0.343987	-0.000218625	-0.357944	-0.0456438	0.480782	0.0527903
33	l	10	wls33rep5	0.284645	-0.0644963	0.24013	-0.0623697	0.187907	0.0688667	0.17828	-0.019012	0.157572	-0.149477	0.0759736	0.0799455	-0.0131107	0.127319	0.00692543	0.0986217	-0.0531798	0.0460199	0.000481231	0.00818143	-0.0624283	-0.0400664	-0.0763612	-0.104526	-0.104474	-0.156546	-0.117929	0.110623	-0.177258	0.0616023	-0.30109	0.000290134	-0.344601	-0.00155117	-0.360036	-0.0469442	0.478553	0.0435179
34	l	1	wls34rep1	0.275363	-0.0610519	0.243153	-0.0637519	0.183699	0.0676417	0.186884	-0.0210139	0.162432	-0.144754	0.0830038	0.0768317	-0.0066471	0.124497	0.0167335	0.0922816	-0.0478695	0.0436529	-0.00380733	0.0114291	-0.0721372	-0.0368581	-0.0802989	-0.105677	-0.105234	-0.152285	-0.119039	0.108434	-0.179572	0.0631943	-0.294018	0.00407552	-0.354704	-0.00166556	-0.36303	-0.051668	0.47509	0.0466878
34	l	2	wls34rep2	0.281928	-0.0634543	0.242926	-0.0632178	0.188881	0.0731087	0.180511	-0.0204502	0.154534	-0.144858	0.0698567	0.0852735	0.000164778	0.129128	0.0251939	0.0975105	-0.0533947	0.0441615	-0.00890023	0.00592825	-0.0785934	-0.0375987	-0.0852604	-0.107247	-0.107403	-0.156001	-0.108379	0.111847	-0.173972	0.0584222	-0.29212	0.00167129	-0.349119	-0.0065601	-0.363441	-0.0527616	0.476587	0.0450987
34	l	3	wls34rep3	0.288485	-0.0620905	0.249617	-0.0623287	0.189488	0.0660947	0.172884	-0.0148594	0.158159	-0.1497	0.0652941	0.0775133	-0.0132576	0.125232	0.0120684	0.0940313	-0.0500861	0.0451914	-0.00685173	0.00969602	-0.0710686	-0.0407099	-0.0795017	-0.102438	-0.106912	-0.154173	-0.117327	0.108011	-0.177665	0.0589243	-0.288512	0.00563949	-0.350653	-0.00251367	-0.356608	-0.0460865	0.482447	0.0445661
34	l	4	wls34rep4	0.278074	-0.060565	0.248354	-0.0597771	0.18317	0.0651888	0.18466	-0.0224448	0.169927	-0.14587	0.0703347	0.073391	-0.0142027	0.127471	0.0140644	0.0895799	-0.0494895	0.0449787	-0.0116526	0.00995583	-0.0721721	-0.0423589	-0.081467	-0.10483	-0.104221	-0.151207	-0.112394	0.112026	-0.169055	0.0612287	-0.297052	0.00376062	-0.349429	0.000984357	-0.364958	-0.0478967	0.477509	0.0463843
34	l	5	wls34rep5	0.301321	-0.0494743	0.267574	-0.0537189	0.188194	0.0795807	0.176679	-0.00408929	0.179696	-0.140611	0.0780238	0.0837977	-0.00921377	0.132855	0.0199202	0.0970907	-0.0463818	0.0475261	-0.00359922	0.0114994	-0.0698903	-0.0380411	-0.0727664	-0.103673	-0.100249	-0.153645	-0.122649	0.116201	-0.180118	0.0614052	-0.297486	-0.00316582	-0.36514	-0.0135511	-0.374102	-0.05685	0.430187	-0.0131364
34	l	6	wls34rep1	0.27722	-0.0634231	0.243701	-0.06031	0.186223	0.0689909	0.187051	-0.0231144	0.160909	-0.142771	0.0817673	0.0768201	-0.00956041	0.124749	0.015601	0.0923603	-0.0490048	0.0438961	-0.00336002	0.00960394	-0.0698266	-0.0386863	-0.0814685	-0.103341	-0.106624	-0.151715	-0.116088	0.110232	-0.180865	0.059908	-0.294926	0.00477049	-0.35386	-0.00289837	-0.362086	-0.0509664	0.475197	0.0458943
34	l	7	wls34rep2	0.280873	-0.0638902	0.242066	-0.0636261	0.185047	0.0744062	0.183611	-0.0215692	0.153516	-0.148408	0.0697026	0.0824397	0.000933452	0.129741	0.0237356	0.0967265	-0.0563057	0.0439741	-0.0091713	0.0128607	-0.0778222	-0.0378994	-0.0808913	-0.107735	-0.108112	-0.153608	-0.108887	0.112898	-0.172381	0.0595178	-0.292599	-0.00201469	-0.350313	-0.00446838	-0.361524	-0.0545854	0.478522	0.0452421
34	l	8	wls34rep3	0.289117	-0.0633871	0.250195	-0.0636371	0.186558	0.0672599	0.175159	-0.0163727	0.156819	-0.150909	0.0642534	0.0802271	-0.0110348	0.125676	0.0102055	0.0913002	-0.0504514	0.040309	-0.0105336	0.00708996	-0.0720164	-0.0363832	-0.0811863	-0.103651	-0.102672	-0.152575	-0.114996	0.110218	-0.181103	0.059971	-0.286637	0.00583604	-0.348366	0.00128801	-0.357125	-0.0493689	0.483813	0.0471099
34	l	9	wls34rep4	0.277462	-0.058366	0.247245	-0.0631715	0.18214	0.0654249	0.18563	-0.0224025	0.171268	-0.144055	0.0694067	0.0752807	-0.011887	0.125217	0.0166191	0.0892073	-0.0507382	0.0429534	-0.0125024	0.0116773	-0.073116	-0.0426109	-0.0843145	-0.106809	-0.103141	-0.15172	-0.113624	0.111765	-0.170056	0.0626958	-0.294309	0.00465872	-0.350397	0.00211288	-0.364161	-0.0488233	0.478475	0.0469649
34	l	10	wls34rep5	0.291475	-0.0608976	0.260417	-0.0626782	0.18592	0.0704602	0.17416	-0.0117635	0.171734	-0.145655	0.0741481	0.0782481	-0.00658753	0.128119	0.0192703	0.0925082	-0.0438617	0.0430724	-0.00431621	0.00869855	-0.0704406	-0.0363331	-0.0771992	-0.102227	-0.101869	-0.151286	-0.119208	0.11112	-0.176431	0.0624876	-0.294952	0.00437942	-0.362134	-0.00587991	-0.370935	-0.0521955	0.450817	0.0298527
1	r	1	wrs01rep1	0.2789	-0.0608141	0.246087	-0.0626744	0.183738	0.0699625	0.182514	-0.0249721	0.149932	-0.156392	0.0701934	0.0812384	-0.00782473	0.122315	0.0146263	0.0961189	-0.0470945	0.043873	-0.00200832	0.00858779	-0.0709473	-0.0419706	-0.0757181	-0.111322	-0.100591	-0.160745	-0.116555	0.113418	-0.178812	0.0670108	-0.295741	0.00670804	-0.350107	0.00226211	-0.357885	-0.047343	0.477293	0.054739
1	r	2	wrs01rep1	0.287115	-0.0634064	0.250289	-0.0620973	0.188241	0.0666085	0.173488	-0.0146453	0.158584	-0.151382	0.0642208	0.0797803	-0.0110147	0.125171	0.0125265	0.0942144	-0.0501281	0.041682	-0.00998891	0.0103177	-0.0721489	-0.0385819	-0.0812935	-0.105795	-0.10638	-0.154189	-0.116946	0.108129	-0.177289	0.0589832	-0.286597	0.00354541	-0.349841	0.00104829	-0.356269	-0.046183	0.483431	0.0467999
1	r	3	wrs01rep2	0.27705	-0.0583701	0.242698	-0.060276	0.183231	0.0685763	0.180198	-0.0206716	0.152107	-0.150393	0.0754259	0.0802403	-0.00930302	0.130581	0.0134665	0.0950809	-0.0408981	0.0410118	0.00452714	0.0023577	-0.0720571	-0.0409757	-0.0795208	-0.107151	-0.0994255	-0.157418	-0.114988	0.111692	-0.178511	0.0638359	-0.297776	0.00574255	-0.3552	-0.000594701	-0.359829	-0.0498032	0.478805	0.0465345
1	r	4	wrs01rep2	0.275251	-0.0602436	0.246575	-0.0625109	0.184975	0.0664081	0.180188	-0.0227854	0.152396	-0.150717	0.0696159	0.0802063	-0.011442	0.13023	0.0132925	0.0946483	-0.0371168	0.0421591	0.00649565	0.00366219	-0.0717464	-0.0359215	-0.0793104	-0.105933	-0.103038	-0.157949	-0.117248	0.109265	-0.178725	0.0630782	-0.293957	0.00835376	-0.3515	2.43477e-05	-0.36384	-0.0526004	0.479134	0.0506245
1	r	5	wrs01rep3	0.274901	-0.0567498	0.244951	-0.0600861	0.18682	0.0694199	0.187531	-0.0210054	0.151621	-0.150741	0.0769582	0.0750119	-0.0123063	0.123913	0.0130004	0.0928494	-0.0403268	0.0392016	-0.000529665	0.00618549	-0.0678437	-0.0418907	-0.0800043	-0.104776	-0.103378	-0.155087	-0.115555	0.110175	-0.171278	0.0660649	-0.299701	0.00226448	-0.351377	0.00185252	-0.369071	-0.0473793	0.475588	0.0507777
1	r	6	wrs01rep3	0.274354	-0.0552309	0.245907	-0.060707	0.185234	0.067421	0.189807	-0.0237235	0.150987	-0.149789	0.0755434	0.076376	-0.0138441	0.126993	0.0108904	0.0904671	-0.0383339	0.0396896	-0.000400286	0.00511257	-0.0691051	-0.0393954	-0.0813766	-0.104295	-0.101295	-0.157095	-0.112369	0.108605	-0.175147	0.0670074	-0.298065	0.00380331	-0.353987	0.000107538	-0.365677	-0.0463911	0.476876	0.051044
1	r	7	wrs01rep4	0.275689	-0.0559617	0.245739	-0.059298	0.187608	0.070208	0.188319	-0.0202173	0.152409	-0.149953	0.0777462	0.0758	-0.0115183	0.124701	0.0137885	0.0936375	-0.0395387	0.0399897	0.000258423	0.00697358	-0.0670556	-0.0411026	-0.0792162	-0.103988	-0.10259	-0.154299	-0.114767	0.110963	-0.17049	0.066853	-0.298913	0.00305256	-0.350589	0.00264061	-0.368283	-0.0465912	0.476376	0.0515658
1	r	8	wrs01rep4	0.275235	-0.0543501	0.246788	-0.0598262	0.186115	0.0683018	0.190688	-0.0228427	0.151868	-0.148908	0.0764243	0.0772568	-0.0129633	0.127874	0.0117713	0.091348	-0.0374531	0.0405705	0.000480554	0.00599341	-0.0682242	-0.0385145	-0.0804958	-0.103414	-0.100414	-0.156214	-0.111488	0.109485	-0.174266	0.0678882	-0.297184	0.00468415	-0.353106	0.000988378	-0.364796	-0.0455103	0.477757	0.0519248
1	r	9	wrs01rep5	0.276924	-0.0615864	0.242245	-0.0631207	0.189406	0.0697661	0.17439	-0.0222985	0.154551	-0.154021	0.0754181	0.07787	-0.0122854	0.128766	0.0180279	0.0944247	-0.0518565	0.0396849	-0.00431607	0.00516569	-0.0709365	-0.0384784	-0.0794271	-0.108344	-0.098156	-0.15206	-0.112036	0.112145	-0.169447	0.0654678	-0.297815	0.00250662	-0.352065	-0.00239785	-0.363238	-0.0470303	0.480615	0.053539
1	r	10	wrs01rep5	0.274517	-0.0595995	0.241765	-0.0613669	0.186623	0.067812	0.177754	-0.0210631	0.156077	-0.152404	0.0732257	0.0796562	-0.0113001	0.124363	0.0156717	0.0942956	-0.0484646	0.0389215	-0.00308812	0.0027948	-0.0693932	-0.0389238	-0.0795178	-0.106594	-0.102673	-0.15546	-0.112357	0.111743	-0.171119	0.0691101	-0.296011	0.00197163	-0.351852	-0.00082291	-0.363232	-0.0472896	0.483375	0.0528558
3	r	1	wrs03rep1	0.278761	-0.0590046	0.252462	-0.0599856	0.187375	0.0684509	0.176784	-0.0146243	0.157245	-0.14727	0.0780038	0.0780631	-0.00488345	0.126052	0.0119761	0.0906103	-0.0480998	0.035183	-0.00786997	0.00850681	-0.0743725	-0.0368947	-0.0867221	-0.101077	-0.114366	-0.150557	-0.11882	0.109954	-0.174611	0.0596888	-0.287277	0.00229782	-0.347848	-0.00443683	-0.361956	-0.0497265	0.484218	0.0447691
3	r	2	wrs03rep1	0.278731	-0.0571584	0.250433	-0.0598033	0.187041	0.0663694	0.178543	-0.0149309	0.1589	-0.149231	0.074331	0.0781511	-0.00864536	0.124184	0.0141314	0.091917	-0.0434022	0.0418946	-0.00914856	0.0121624	-0.073876	-0.0352397	-0.0863714	-0.101177	-0.113951	-0.150594	-0.117054	0.105632	-0.178086	0.0578446	-0.286475	0.00379798	-0.347144	-0.00480055	-0.36325	-0.0516816	0.485291	0.0426631
3	r	3	wrs03rep2	0.284129	-0.0592008	0.247986	-0.057671	0.184737	0.066359	0.180915	-0.0192058	0.163743	-0.151961	0.0696738	0.0761263	-0.00844303	0.126407	0.015107	0.0909647	-0.0469383	0.0401604	-0.0126775	0.0102301	-0.0728796	-0.0409444	-0.0822012	-0.106215	-0.107357	-0.154863	-0.125762	0.105936	-0.181904	0.0558619	-0.287474	0.00807076	-0.342069	0.00372892	-0.360948	-0.0423475	0.482363	0.0485635
3	r	4	wrs03rep2	0.284875	-0.0608842	0.24866	-0.0593621	0.182302	0.0693274	0.182191	-0.0171493	0.160588	-0.153118	0.0703316	0.0764895	-0.00684999	0.122781	0.0138075	0.0917121	-0.0487153	0.0389438	-0.0136356	0.0126581	-0.0702469	-0.0393776	-0.0832601	-0.104035	-0.109566	-0.158325	-0.125494	0.106299	-0.18136	0.0579566	-0.287493	0.00819427	-0.342565	0.00198112	-0.357403	-0.0430878	0.483835	0.0489963
3	r	5	wrs03rep3	0.283341	-0.0599889	0.247198	-0.0584591	0.183949	0.065571	0.180127	-0.0199939	0.162955	-0.152749	0.0688857	0.0753382	-0.00923111	0.125619	0.0143189	0.0901766	-0.0477264	0.0393723	-0.0134656	0.00944202	-0.0736677	-0.0417325	-0.0829893	-0.107003	-0.108146	-0.155651	-0.12655	0.105148	-0.182692	0.0550738	-0.288262	0.00728267	-0.342858	0.00294083	-0.361736	-0.0431356	0.481575	0.0477754
3	r	6	wrs03rep4	0.281666	-0.0583954	0.246327	-0.0578235	0.186272	0.0683041	0.168757	-0.0107107	0.159218	-0.150797	0.0709742	0.0809673	0.00063349	0.126819	0.0176177	0.095877	-0.0459341	0.0416897	-0.00117036	0.00962757	-0.0698324	-0.041802	-0.0826986	-0.10484	-0.114526	-0.158967	-0.110668	0.108946	-0.176025	0.0550765	-0.291524	0.00249071	-0.350162	-0.00219481	-0.367424	-0.0476777	0.478498	0.0434108
3	r	7	wrs03rep4	0.283016	-0.0585173	0.249396	-0.0582534	0.183764	0.0691755	0.170992	-0.0146262	0.160539	-0.149329	0.0696559	0.0797652	0.00126775	0.127251	0.0140289	0.0932281	-0.0472558	0.0422186	-0.000564354	0.00974456	-0.0712355	-0.0414928	-0.0826527	-0.106828	-0.112129	-0.157784	-0.11215	0.109668	-0.173749	0.0568461	-0.293513	0.00296308	-0.348365	-0.000543521	-0.367814	-0.0476418	0.476769	0.0441562
3	r	8	wrs03rep5	0.283559	-0.0616107	0.255444	-0.0611371	0.173975	0.0656839	0.174731	-0.0172386	0.167118	-0.14724	0.0774539	0.071643	-0.0128626	0.12327	0.00563645	0.0872757	-0.0474003	0.042387	-0.00298211	0.00451264	-0.0707624	-0.0390443	-0.0762466	-0.107439	-0.106938	-0.153423	-0.1079	0.110095	-0.171074	0.0617792	-0.296402	0.00441951	-0.351604	0.00138598	-0.369567	-0.0379684	0.475823	0.0526483
3	r	9	wrs03rep5	0.283261	-0.0591783	0.254733	-0.0605468	0.172594	0.0644567	0.17708	-0.0193146	0.167878	-0.149056	0.0763651	0.0720588	-0.0123211	0.123196	0.00702995	0.0907921	-0.048552	0.0425715	-0.00223576	0.00434829	-0.0718012	-0.0389707	-0.07679	-0.105638	-0.103452	-0.150694	-0.109993	0.106647	-0.171348	0.0577964	-0.295528	0.00556921	-0.35296	0.00103339	-0.370487	-0.0365888	0.476529	0.0515182
5	r	10	wrs03rep6	0.283301	-0.0612756	0.248856	-0.0611794	0.185228	0.0688722	0.181223	-0.0160056	0.157146	-0.145436	0.0632926	0.0790026	-0.00866985	0.125884	0.00969222	0.095152	-0.0599025	0.0441517	-0.0014762	0.00860338	-0.0703086	-0.0391999	-0.0774466	-0.100355	-0.106567	-0.148835	-0.108479	0.10979	-0.174295	0.0632962	-0.299838	-0.00410305	-0.341267	-0.00775153	-0.364899	-0.0474053	0.48441	0.036794
7	r	1	wrs07rep1	0.279801	-0.0578139	0.244341	-0.0557604	0.189256	0.0642053	0.186492	-0.0181049	0.159756	-0.142634	0.0673681	0.0734581	-0.0105412	0.120667	0.0183669	0.0843275	-0.047106	0.03758	-0.00525954	0.0103392	-0.0715328	-0.0376375	-0.0818537	-0.0992579	-0.102081	-0.149172	-0.115887	0.106883	-0.175636	0.0581643	-0.294798	0.00431082	-0.355439	-2.05816e-05	-0.367166	-0.0449554	0.481919	0.0454216
7	r	2	wrs07rep1	0.280613	-0.0581174	0.243061	-0.0564823	0.188715	0.0649245	0.18716	-0.0183226	0.161155	-0.141817	0.0678613	0.0734172	-0.00893329	0.119918	0.0187823	0.0843152	-0.0476676	0.0415747	-0.0048995	0.010211	-0.0725239	-0.037027	-0.0820732	-0.097514	-0.102718	-0.150773	-0.116489	0.105706	-0.175544	0.0581524	-0.294484	0.00220288	-0.354423	-0.000890133	-0.368643	-0.0442912	0.481051	0.0448126
7	r	3	wrs07rep2	0.279516	-0.0606563	0.250601	-0.0620101	0.19064	0.0646766	0.179683	-0.0179926	0.154798	-0.142893	0.066887	0.0800855	-0.0103665	0.128033	0.00553467	0.0971153	-0.0515054	0.0447996	-0.00115974	0.010041	-0.0711568	-0.0377349	-0.0834245	-0.105552	-0.106178	-0.156339	-0.122333	0.11157	-0.182858	0.0649297	-0.290908	0.00392554	-0.345234	-0.00445582	-0.349826	-0.0542369	0.487288	0.0366948
7	r	4	wrs07rep2	0.280421	-0.0618365	0.248965	-0.0616278	0.189737	0.0663482	0.18085	-0.0158694	0.157257	-0.141601	0.0643716	0.0791971	-0.010868	0.12762	0.0055278	0.0946449	-0.0532625	0.0451347	-0.00162708	0.0095934	-0.0708473	-0.0369499	-0.0835815	-0.10274	-0.104887	-0.159702	-0.122559	0.114438	-0.180078	0.064146	-0.291462	0.00339925	-0.344233	-0.00246752	-0.351169	-0.0560625	0.487446	0.0343348
7	r	5	wrs07rep3	0.277824	-0.0581058	0.246205	-0.0599776	0.189848	0.0666875	0.176895	-0.0156471	0.158124	-0.144374	0.0705407	0.0781544	-0.00439219	0.12496	0.0189097	0.0918047	-0.0456977	0.0401065	-0.00802615	0.0108885	-0.0717205	-0.039632	-0.0802538	-0.106542	-0.102793	-0.155047	-0.11426	0.112137	-0.172597	0.0612322	-0.300821	0.000433316	-0.353342	-0.0040801	-0.362955	-0.0456448	0.478512	0.0426455
7	r	6	wrs07rep3	0.277812	-0.0589591	0.246439	-0.0629077	0.188408	0.0689503	0.17894	-0.0161653	0.157742	-0.143126	0.0693031	0.0783898	-0.00564894	0.125257	0.0209182	0.0914215	-0.0458406	0.0394626	-0.00933949	0.0111243	-0.0719161	-0.0403075	-0.0795723	-0.106073	-0.102411	-0.152504	-0.11532	0.110389	-0.173977	0.0615746	-0.299034	0.000152831	-0.353025	-0.00133319	-0.363052	-0.0482751	0.479574	0.0429289
7	r	7	wrs07rep4	0.286655	-0.0579574	0.248484	-0.060904	0.189853	0.0652719	0.181523	-0.0194108	0.15776	-0.152117	0.0625849	0.0784587	-0.010558	0.123975	0.00800426	0.0946411	-0.0549302	0.0434033	0.00344306	0.0082018	-0.064281	-0.0385076	-0.0722619	-0.102653	-0.0978997	-0.152833	-0.113737	0.109854	-0.180952	0.0617613	-0.299696	0.00427656	-0.351351	-0.000452658	-0.364521	-0.0460826	0.471881	0.0410742
7	r	8	wrs07rep4	0.286326	-0.0594699	0.247615	-0.0610439	0.190792	0.0643467	0.182477	-0.0204122	0.158596	-0.148578	0.0661794	0.0785232	-0.00930426	0.121662	0.00637811	0.0959567	-0.0528133	0.0428992	0.000451745	0.00893472	-0.0654268	-0.0387127	-0.0715055	-0.103795	-0.0971521	-0.154026	-0.114966	0.109764	-0.182228	0.0616116	-0.298287	0.00505728	-0.353264	0.000682666	-0.364541	-0.0458697	0.470673	0.0424689
7	r	9	wrs07rep5	0.281823	-0.0616252	0.248568	-0.0623976	0.185353	0.0675353	0.17987	-0.0141539	0.156854	-0.146284	0.0657474	0.0780914	-0.0100994	0.124683	0.0100462	0.0962157	-0.0604674	0.0443481	-0.0042992	0.00856418	-0.0689687	-0.0386378	-0.0779379	-0.103965	-0.10333	-0.147797	-0.106734	0.11014	-0.175356	0.0605186	-0.300208	-0.00121797	-0.342505	-0.00588948	-0.363935	-0.0472999	0.48558	0.0391701
7	r	10	wrs07rep5	0.287061	-0.0600519	0.247963	-0.0616994	0.185217	0.0685871	0.184226	-0.0224954	0.159981	-0.150126	0.0675541	0.0762233	-0.00906845	0.119711	0.0100008	0.0924942	-0.0591177	0.0435864	0.000210421	0.00736376	-0.0645693	-0.0365914	-0.0734095	-0.100657	-0.0990325	-0.150892	-0.110203	0.11023	-0.174674	0.0616308	-0.300368	0.00712004	-0.350936	0.00238143	-0.368068	-0.0491585	0.472286	0.0473982
9	r	1	wrs09rep1	0.28524	-0.0607372	0.24925	-0.0646133	0.182672	0.0663478	0.172289	-0.0161557	0.156562	-0.14849	0.0670134	0.0763731	-0.00549484	0.123173	0.0181516	0.0925255	-0.056069	0.0459756	-0.00281987	0.00888324	-0.0711804	-0.0423847	-0.0782136	-0.106322	-0.100947	-0.153747	-0.127821	0.10571	-0.181108	0.0635584	-0.295822	0.00515403	-0.341687	0.0034238	-0.356666	-0.0463757	0.486649	0.0477003
9	r	2	wrs09rep2	0.279735	-0.0588835	0.250221	-0.0617919	0.178876	0.0678401	0.181314	-0.0210784	0.162363	-0.148784	0.0640476	0.0764407	-0.00961349	0.12206	0.0130718	0.0907824	-0.0586809	0.0441075	-0.00181277	0.00600467	-0.0715723	-0.0368382	-0.0760287	-0.10391	-0.101407	-0.15036	-0.114174	0.108276	-0.17535	0.0585357	-0.291644	0.00581076	-0.349212	0.000452813	-0.36539	-0.0446954	0.485258	0.046031
9	r	3	wrs09rep1	0.285894	-0.0625916	0.248253	-0.0612673	0.183115	0.0667554	0.172672	-0.0157931	0.156134	-0.15149	0.0662176	0.0778055	-0.00630607	0.124681	0.0187354	0.0909359	-0.0546166	0.0455766	-0.00676395	0.00891855	-0.0690743	-0.0395406	-0.0768707	-0.106803	-0.103656	-0.156814	-0.124712	0.109855	-0.179496	0.0611316	-0.296889	0.00677139	-0.341384	0.00200644	-0.356404	-0.0478151	0.485154	0.0476773
9	r	4	wrs09rep3	0.286787	-0.0561053	0.257922	-0.0626633	0.187439	0.0630604	0.182032	-0.0199052	0.165463	-0.148317	0.0653612	0.0731318	-0.0123753	0.12094	0.0102971	0.0913505	-0.0544948	0.0408762	-0.00793634	0.00855141	-0.0757696	-0.0359916	-0.0810888	-0.098677	-0.105639	-0.147244	-0.120441	0.10223	-0.175133	0.0554391	-0.294514	0.00618609	-0.343979	0.00179819	-0.362912	-0.0416431	0.47898	0.0469833
9	r	5	wrs09rep2	0.279969	-0.0592212	0.249969	-0.0605613	0.177608	0.0689722	0.180166	-0.0214736	0.163638	-0.148284	0.0636441	0.0750948	-0.0122617	0.123486	0.0107753	0.0906426	-0.0573752	0.0421988	-0.0015223	0.00677328	-0.070581	-0.0387523	-0.0757482	-0.104393	-0.104691	-0.150229	-0.113572	0.109537	-0.173064	0.0589901	-0.292552	0.00576008	-0.34872	0.00107017	-0.363167	-0.0450515	0.487484	0.0454423
9	r	6	wrs09rep4	0.283641	-0.0570358	0.245444	-0.0608409	0.193975	0.0636514	0.185891	-0.0204311	0.155489	-0.147203	0.0787284	0.0705152	-0.0154328	0.120875	0.00533434	0.0895419	-0.0531269	0.0434841	-0.00904624	0.00953508	-0.0637376	-0.0389645	-0.0721648	-0.0960358	-0.0985689	-0.14501	-0.125817	0.104933	-0.181386	0.0605772	-0.302917	0.0054119	-0.345276	0.000720787	-0.362127	-0.0473009	0.481098	0.043576
9	r	7	wrs09rep3	0.285768	-0.0587617	0.256541	-0.0631996	0.188807	0.0663925	0.182704	-0.0199588	0.166493	-0.145221	0.0648185	0.0742529	-0.0117448	0.121352	0.00882683	0.0913739	-0.0552367	0.0421328	-0.0083496	0.00761193	-0.0754499	-0.0356856	-0.0826374	-0.100846	-0.106088	-0.150324	-0.119975	0.102776	-0.176323	0.0589775	-0.292891	0.00389588	-0.34603	0.00222939	-0.358475	-0.0423745	0.479242	0.0453765
9	r	8	wrs09rep5	0.273967	-0.0568237	0.250337	-0.0605452	0.186887	0.0643927	0.190768	-0.0280844	0.164964	-0.141426	0.0744034	0.0755335	-0.00393734	0.122204	0.010396	0.0933084	-0.0522296	0.0414146	-0.0126382	0.0133919	-0.0683339	-0.0413344	-0.0816226	-0.106558	-0.101076	-0.151833	-0.118389	0.10645	-0.174507	0.0590535	-0.298242	0.00538233	-0.352834	0.00280717	-0.363316	-0.0448887	0.475405	0.047555
9	r	9	wrs09rep4	0.284472	-0.0566689	0.242633	-0.0580347	0.196304	0.0628206	0.187451	-0.0222624	0.15341	-0.146221	0.0768338	0.0708212	-0.0153622	0.118131	0.00985096	0.0910955	-0.052552	0.0442835	-0.00815691	0.00838198	-0.0651762	-0.0383587	-0.0739368	-0.0985759	-0.100691	-0.145344	-0.123784	0.104718	-0.180428	0.0612956	-0.304455	0.00457691	-0.345431	-0.000921877	-0.36185	-0.0454845	0.480868	0.0457474
9	r	10	wrs09rep5	0.274468	-0.0569238	0.249598	-0.0598115	0.185011	0.0660683	0.192065	-0.026866	0.165325	-0.141468	0.0728868	0.0752865	-0.00381825	0.119208	0.010488	0.0955791	-0.0509978	0.0429043	-0.011815	0.0115683	-0.0696296	-0.0435446	-0.0825854	-0.105531	-0.102906	-0.152035	-0.115095	0.108449	-0.174548	0.061483	-0.295142	0.0074987	-0.351795	-0.000732567	-0.366812	-0.0472283	0.475302	0.0460951
10	r	1	wrs10rep1	0.281872	-0.0631196	0.253202	-0.0605116	0.181717	0.0670334	0.188053	-0.0220616	0.16377	-0.149922	0.0720964	0.0734006	-0.0103139	0.120646	0.00890372	0.0936038	-0.0533244	0.0450717	-0.00772267	0.0102106	-0.0701132	-0.0401112	-0.0774511	-0.100867	-0.104007	-0.15445	-0.11098	0.106324	-0.176298	0.0634929	-0.302698	0.00454622	-0.349938	0.00161953	-0.359555	-0.0444751	0.472786	0.0495684
10	r	2	wrs10rep2	0.280206	-0.060376	0.248649	-0.0630377	0.179806	0.0662986	0.181941	-0.0183386	0.161036	-0.147225	0.0677942	0.0773749	-0.00429677	0.122872	0.0168343	0.0922487	-0.0531776	0.0402864	-0.00514177	0.00568247	-0.0705057	-0.0396372	-0.0800619	-0.104213	-0.0985254	-0.154639	-0.112848	0.107774	-0.178475	0.0606617	-0.307214	0.00822292	-0.348275	0.00330057	-0.357503	-0.0466583	0.479758	0.049404
10	r	3	wrs10rep1	0.282151	-0.0629698	0.251536	-0.0619469	0.182201	0.0672951	0.18483	-0.0214586	0.16591	-0.147963	0.0745683	0.075439	-0.00808927	0.119209	0.00929637	0.092311	-0.0546106	0.0458326	-0.0092334	0.00912489	-0.067769	-0.037849	-0.079102	-0.101831	-0.107352	-0.153409	-0.108422	0.108612	-0.175907	0.0624659	-0.304153	0.0038745	-0.349595	0.000848971	-0.35944	-0.0470124	0.473181	0.0494268
10	r	4	wrs10rep3	0.28641	-0.0597168	0.249934	-0.0645116	0.180437	0.0648209	0.17265	-0.0191074	0.164506	-0.145802	0.0620368	0.0766709	-0.0113118	0.123048	0.00789511	0.0926298	-0.0592883	0.0426132	-0.0042441	0.00596067	-0.0676546	-0.0355988	-0.082868	-0.102944	-0.105517	-0.153709	-0.115427	0.107456	-0.175293	0.0650966	-0.291192	0.0055985	-0.350135	0.000290593	-0.351693	-0.0477903	0.490755	0.0449951
10	r	5	wrs10rep2	0.281944	-0.0588176	0.248936	-0.0595115	0.17937	0.0657589	0.181218	-0.0222592	0.159708	-0.14528	0.0709035	0.074189	-0.0044693	0.121691	0.016699	0.0911962	-0.0524893	0.0427373	-0.00472642	0.00655596	-0.0716049	-0.0385822	-0.0812196	-0.104827	-0.0995002	-0.15519	-0.110681	0.107855	-0.177558	0.0627176	-0.304587	0.00620108	-0.34886	0.00348499	-0.361767	-0.0476562	0.478686	0.0497375
10	r	6	wrs10rep4	0.277439	-0.060665	0.244738	-0.0625219	0.190327	0.0621637	0.178621	-0.0205158	0.164449	-0.146276	0.0649919	0.0781325	-0.00526635	0.126798	0.0172303	0.093077	-0.0550717	0.0435231	-0.00473712	0.00710003	-0.077998	-0.0384343	-0.0841248	-0.105333	-0.100452	-0.150873	-0.115307	0.110728	-0.176391	0.0604546	-0.292077	0.00394467	-0.348057	-7.05003e-05	-0.361621	-0.0500482	0.483306	0.048816
10	r	7	wrs10rep3	0.285384	-0.0617641	0.247971	-0.0626249	0.182043	0.0657753	0.173884	-0.0198495	0.16441	-0.144263	0.0615765	0.0762149	-0.0130879	0.124701	0.00747991	0.0921456	-0.0556916	0.0431285	-0.00462618	0.00555135	-0.0683684	-0.0377558	-0.0813828	-0.103674	-0.10497	-0.15046	-0.117904	0.105557	-0.173367	0.0659621	-0.291316	0.00511825	-0.350204	-0.000199793	-0.353518	-0.0478384	0.491688	0.044275
10	r	8	wrs10rep5	0.281255	-0.0614845	0.246716	-0.0612139	0.196693	0.0637308	0.17454	-0.0157452	0.160532	-0.143234	0.0779131	0.073807	-0.00479389	0.123625	0.0106603	0.0989151	-0.0555937	0.0449851	-0.0117791	0.00989832	-0.0763506	-0.0367332	-0.0868606	-0.107355	-0.1037	-0.155377	-0.115425	0.110677	-0.176345	0.0632051	-0.298335	0.0009774	-0.345093	-0.00170386	-0.354628	-0.0514067	0.480595	0.0444326
10	r	9	wrs10rep4	0.278118	-0.063572	0.246386	-0.0617458	0.189385	0.0652483	0.1798	-0.023296	0.163954	-0.146311	0.0637378	0.0779316	-0.00568479	0.1284	0.0179952	0.0925312	-0.0551103	0.047383	-0.0041331	0.00695241	-0.0794526	-0.0395623	-0.0835332	-0.104815	-0.0989839	-0.154137	-0.115766	0.110917	-0.177179	0.0592234	-0.290363	0.00463273	-0.34835	-0.000573952	-0.361581	-0.0485268	0.480761	0.0493213
10	r	10	wrs10rep5	0.280818	-0.0612029	0.244515	-0.060573	0.196191	0.0636619	0.175612	-0.017956	0.162672	-0.14161	0.076189	0.075763	-0.00646198	0.12536	0.0118178	0.0962402	-0.0556405	0.0445298	-0.011425	0.0113965	-0.074822	-0.0393242	-0.0866027	-0.107606	-0.105156	-0.155158	-0.113658	0.109595	-0.176219	0.0625189	-0.301128	0.00284907	-0.344159	-0.0007387	-0.354012	-0.0521958	0.481469	0.0444498
11	r	1	wrs11rep1	0.275983	-0.057276	0.241744	-0.05949	0.18418	0.0688899	0.184089	-0.021151	0.154457	-0.153792	0.0740642	0.0806785	-0.00724072	0.131468	0.0151228	0.0948944	-0.0455396	0.0381729	0.00528708	0.00314259	-0.0696587	-0.0412132	-0.0835763	-0.107722	-0.109244	-0.158637	-0.114009	0.114416	-0.176087	0.0598695	-0.284996	0.00573307	-0.357427	0.000259084	-0.363997	-0.0490254	0.47685	0.0507824
11	r	2	wrs11rep2	0.2851	-0.0649163	0.239822	-0.060859	0.178413	0.0705668	0.182419	-0.0163633	0.161267	-0.14873	0.0685985	0.0782087	-0.00368016	0.125298	0.0196776	0.0943994	-0.0452765	0.0405684	-0.00824809	0.0111189	-0.0725537	-0.038993	-0.0776726	-0.101339	-0.0982331	-0.153326	-0.118027	0.106904	-0.181682	0.0605105	-0.295402	0.00176392	-0.351604	-0.00185489	-0.363103	-0.0458424	0.480186	0.0428861
11	r	3	wrs11rep1	0.277297	-0.0578198	0.24528	-0.0585936	0.183917	0.0685826	0.183775	-0.0213217	0.154108	-0.153742	0.0739785	0.0804181	-0.00754939	0.129385	0.0151356	0.0946459	-0.0472589	0.0384221	0.0038474	0.00520864	-0.0713884	-0.0408275	-0.0813616	-0.106186	-0.10919	-0.158425	-0.114163	0.11242	-0.175801	0.0597857	-0.288159	0.0065501	-0.352936	0.0014139	-0.365656	-0.0502492	0.476126	0.0503321
11	r	4	wrs11rep3	0.276123	-0.0601406	0.237807	-0.0638705	0.182856	0.0687624	0.179603	-0.0200717	0.156229	-0.158099	0.0757983	0.0795357	-0.00474442	0.12748	0.018523	0.0947864	-0.0418052	0.0420489	-0.00519514	0.00990782	-0.0690868	-0.0405733	-0.0760822	-0.11006	-0.103721	-0.1585	-0.112186	0.115526	-0.181893	0.0637363	-0.296132	0.00314597	-0.353229	0.00130239	-0.360215	-0.0492141	0.47735	0.0542957
11	r	5	wrs11rep2	0.284662	-0.0668123	0.241941	-0.0594471	0.178535	0.0719955	0.180192	-0.0181917	0.159944	-0.146685	0.0670143	0.0797532	-0.0052397	0.126645	0.0215313	0.0933363	-0.0484814	0.0422889	-0.00249311	0.00949023	-0.0684715	-0.0403399	-0.0793638	-0.103498	-0.101019	-0.151411	-0.11567	0.107437	-0.181326	0.059464	-0.294454	0.00246171	-0.352742	-0.00278715	-0.364147	-0.0467294	0.479589	0.0430297
11	r	6	wrs11rep4	0.281533	-0.0609273	0.242535	-0.0633744	0.187067	0.0644226	0.18465	-0.0218651	0.158735	-0.152006	0.0660516	0.0770934	-0.0116462	0.126109	0.0164057	0.0901011	-0.0467855	0.0400724	-0.00768978	0.0116622	-0.0690172	-0.0387088	-0.0776601	-0.106501	-0.102195	-0.155946	-0.116285	0.112632	-0.183543	0.0614287	-0.299471	0.00762852	-0.346618	0.00282753	-0.355897	-0.0475007	0.47983	0.0528524
11	r	7	wrs11rep3	0.27608	-0.0621338	0.237932	-0.0639903	0.183321	0.0724686	0.179694	-0.0201711	0.156315	-0.158276	0.0777034	0.0792969	-0.00476512	0.127452	0.0185178	0.0947411	-0.043718	0.0421598	-0.00501974	0.011692	-0.0691323	-0.0406988	-0.0780053	-0.110035	-0.107345	-0.156438	-0.112265	0.115485	-0.180319	0.061595	-0.292361	0.00453088	-0.351746	-0.000883895	-0.362488	-0.0510513	0.477601	0.0542564
11	r	8	wrs11rep5	0.280568	-0.0562766	0.246229	-0.0575772	0.181676	0.0660021	0.174934	-0.0123399	0.162134	-0.144507	0.0766594	0.0719394	-0.010794	0.122025	0.0113417	0.0876703	-0.0320659	0.0368726	-0.00673808	0.00950715	-0.0767895	-0.0420954	-0.0826868	-0.105432	-0.1014	-0.145594	-0.117989	0.105626	-0.184865	0.0610163	-0.29544	0.00544721	-0.354947	0.00117001	-0.357834	-0.0456659	0.48801	0.0422121
11	r	9	wrs11rep4	0.282135	-0.0606024	0.244698	-0.0652935	0.185758	0.0648648	0.184122	-0.0176202	0.157693	-0.15139	0.0645017	0.0755273	-0.010974	0.125931	0.018954	0.0896468	-0.0475041	0.0421397	-0.00909665	0.0100763	-0.0684476	-0.0406562	-0.076666	-0.106532	-0.102643	-0.153754	-0.11736	0.112691	-0.182295	0.0629827	-0.298393	0.0072431	-0.347352	0.00273525	-0.356907	-0.0494176	0.479777	0.0514283
11	r	10	wrs11rep5	0.278309	-0.0564579	0.245842	-0.0581357	0.181528	0.0670392	0.176399	-0.0133808	0.165626	-0.145742	0.0726369	0.0716592	-0.0126219	0.123065	0.0131956	0.0881162	-0.0322491	0.0358213	-0.00691783	0.00852359	-0.074323	-0.039786	-0.0819566	-0.102724	-0.107078	-0.147357	-0.114177	0.105543	-0.180915	0.0608948	-0.297104	0.00440642	-0.354705	-0.000279102	-0.359022	-0.0449016	0.487535	0.0436946
13	r	1	wrs13rep1	0.283911	-0.0597084	0.245726	-0.0599561	0.189021	0.0641772	0.174776	-0.017044	0.161916	-0.152855	0.0658401	0.0746971	-0.00662978	0.124942	0.015619	0.0913056	-0.0554322	0.0433256	-0.0112559	0.0124215	-0.0677943	-0.0361542	-0.0744109	-0.108595	-0.101758	-0.154737	-0.105381	0.110824	-0.172876	0.0608823	-0.298821	0.00425379	-0.349861	0.000898968	-0.368208	-0.047429	0.475619	0.0487517
13	r	2	wrs13rep2	0.284666	-0.058175	0.245282	-0.0594246	0.183753	0.0655795	0.191507	-0.0217002	0.167813	-0.14468	0.0676469	0.0716234	-0.00579869	0.124749	0.0134288	0.0904035	-0.0515134	0.0412927	-0.00785886	0.00745728	-0.0691431	-0.0410104	-0.0768518	-0.104602	-0.0975619	-0.147843	-0.12203	0.110022	-0.177825	0.0625174	-0.294323	0.00625187	-0.353835	0.00147273	-0.368089	-0.0462912	0.470734	0.0423565
13	r	3	wrs13rep1	0.282572	-0.0582946	0.246045	-0.0622369	0.185956	0.0675242	0.178797	-0.0176365	0.164238	-0.149764	0.0681245	0.0760357	-0.00631031	0.122752	0.0142703	0.0928089	-0.0550651	0.0429485	-0.010964	0.0102142	-0.0693375	-0.0382812	-0.074008	-0.107179	-0.101521	-0.156951	-0.104931	0.112284	-0.174415	0.0587966	-0.300244	0.00581732	-0.349555	0.000584569	-0.367841	-0.045933	0.474188	0.0465098
13	r	4	wrs13rep3	0.281199	-0.0616239	0.238976	-0.0578163	0.181268	0.070513	0.184153	-0.0167725	0.163812	-0.148598	0.0773635	0.0758381	-0.0045644	0.127915	0.0194743	0.0913788	-0.0526643	0.0467952	-0.00569161	0.0116203	-0.0625308	-0.0389447	-0.073406	-0.107486	-0.0975891	-0.155535	-0.114103	0.112185	-0.169184	0.0611518	-0.292248	0.00203773	-0.361505	-0.00381287	-0.379005	-0.0480143	0.466246	0.0391684
13	r	5	wrs13rep2	0.283336	-0.0591892	0.249729	-0.0613455	0.177882	0.0675781	0.188219	-0.0231105	0.168304	-0.145584	0.0674743	0.0726339	-0.00793023	0.125402	0.0168445	0.0920152	-0.0502543	0.0442918	-0.00802783	0.00832197	-0.0674832	-0.0399376	-0.0766331	-0.10575	-0.0988197	-0.151208	-0.124252	0.110528	-0.176385	0.0635614	-0.294432	0.00495762	-0.350657	0.00258184	-0.368206	-0.0477186	0.471291	0.0419716
13	r	6	wrs13rep3	0.278885	-0.0622317	0.244913	-0.0592396	0.185064	0.0723084	0.185183	-0.0139167	0.16286	-0.145866	0.076347	0.0768868	-0.00465226	0.132513	0.0191234	0.0976419	-0.0524505	0.0469468	-0.0144129	-0.0318371	-0.0626637	-0.0353572	-0.0761045	-0.105242	-0.0979284	-0.153455	-0.115822	0.111226	-0.174352	0.0613231	-0.290113	0.0069593	-0.356581	-0.00256888	-0.375375	-0.0420457	0.468081	0.0459552
13	r	7	wrs13rep4	0.27945	-0.0640061	0.239373	-0.0643027	0.181199	0.0694072	0.18052	-0.0201128	0.159293	-0.148802	0.073707	0.0782334	-0.00947832	0.125717	0.014805	0.0938316	-0.0403728	0.03838	-0.00970234	0.011347	-0.0694803	-0.0358582	-0.0767309	-0.103517	-0.102043	-0.149667	-0.10827	0.114297	-0.184535	0.0578908	-0.29715	0.0006761	-0.352969	-0.00321033	-0.360926	-0.0478958	0.483311	0.0475909
13	r	8	wrs13rep5	0.278415	-0.0585577	0.245544	-0.0616129	0.19534	0.0692617	0.176479	-0.017978	0.15325	-0.14918	0.0601296	0.079767	-0.00220687	0.124355	0.0168436	0.0942713	-0.0497907	0.0383466	-0.00372546	0.007849	-0.0738942	-0.0380069	-0.0761566	-0.108099	-0.107534	-0.15165	-0.11089	0.111648	-0.177522	0.0557255	-0.293157	0.00239167	-0.348825	-0.000184695	-0.36496	-0.0468664	0.482661	0.0485198
13	r	9	wrs13rep4	0.279853	-0.0621927	0.239725	-0.0624885	0.180974	0.0676425	0.180547	-0.020116	0.157163	-0.150585	0.07335	0.0764822	-0.00755746	0.127521	0.0146286	0.0939747	-0.0443657	0.0389625	-0.00829155	0.00926092	-0.0716384	-0.0356205	-0.0765187	-0.0998691	-0.0988766	-0.152204	-0.108599	0.114469	-0.181214	0.0574865	-0.297717	0.000710605	-0.35386	-0.00505312	-0.36132	-0.0460463	0.483717	0.0476651
13	r	10	wrs13rep5	0.279439	-0.0613998	0.246517	-0.0601907	0.194007	0.0698172	0.175028	-0.017356	0.151621	-0.148465	0.0605712	0.0796939	-0.000853869	0.12605	0.0190246	0.093435	-0.0476598	0.0376318	-0.00675494	0.00953759	-0.0726813	-0.0403506	-0.0768031	-0.105374	-0.10647	-0.153894	-0.115359	0.110047	-0.177068	0.0602208	-0.292666	0.00286241	-0.347432	-0.00214971	-0.365326	-0.0479683	0.482866	0.047852
15	r	1	wrs15rep1	0.285934	-0.0639953	0.247087	-0.0632968	0.191165	0.068422	0.18078	-0.0179441	0.159004	-0.148266	0.0712176	0.0776475	-0.00927835	0.119727	0.018431	0.0891988	-0.0548541	0.0410576	-0.01295	0.0138041	-0.0721473	-0.0363548	-0.0821524	-0.101532	-0.102501	-0.15239	-0.126105	0.105932	-0.17452	0.0661724	-0.302832	0.00312905	-0.343517	0.000327855	-0.353239	-0.0489552	0.480478	0.0473161
15	r	2	wrs15rep2	0.285064	-0.0634574	0.242949	-0.0603408	0.196659	0.0657678	0.182909	-0.019106	0.158524	-0.146736	0.0636735	0.0799042	-0.00720056	0.122896	0.0103746	0.0941018	-0.0570677	0.0438736	-0.0145051	0.00917894	-0.0720452	-0.0370957	-0.0795545	-0.1063	-0.102196	-0.154523	-0.11901	0.107657	-0.172645	0.0626027	-0.300797	0.003682	-0.345606	0.00167484	-0.351997	-0.0491787	0.48247	0.0453987
15	r	3	wrs15rep1	0.283394	-0.0643631	0.244623	-0.0617376	0.196279	0.0664223	0.180288	-0.0179456	0.15794	-0.149827	0.0694212	0.0763045	-0.0107105	0.123978	0.01857	0.0915564	-0.0584213	0.0420819	-0.0149446	0.0128716	-0.0725799	-0.0387961	-0.0774846	-0.100467	-0.101597	-0.15288	-0.124047	0.107085	-0.172668	0.0640374	-0.301137	0.00159139	-0.347051	0.000845345	-0.351683	-0.0484721	0.48181	0.0477145
15	r	4	wrs15rep3	0.280235	-0.0601208	0.249613	-0.0653459	0.189001	0.0669928	0.182668	-0.0175716	0.160014	-0.145734	0.0789811	0.0741482	-0.00996071	0.121888	0.0107908	0.0947426	-0.0538319	0.0411451	-0.00762765	0.0131778	-0.071393	-0.0369675	-0.0768943	-0.103411	-0.102264	-0.153926	-0.111754	0.110505	-0.179398	0.0594911	-0.29061	0.00279679	-0.35574	-0.00119197	-0.365159	-0.0465047	0.473331	0.0458865
15	r	5	wrs15rep2	0.287279	-0.0619653	0.246619	-0.0609471	0.194836	0.0662117	0.181072	-0.0187812	0.158469	-0.146882	0.0634706	0.0800661	-0.00960496	0.121598	0.0116116	0.0921792	-0.0577282	0.0421696	-0.0148117	0.00923691	-0.072428	-0.0371058	-0.0775501	-0.103085	-0.100513	-0.153183	-0.119761	0.106037	-0.174982	0.0630168	-0.299693	0.00341982	-0.346371	0.00169956	-0.352474	-0.0474178	0.482559	0.0437338
15	r	6	wrs15rep4	0.280634	-0.0618966	0.238598	-0.0598735	0.194908	0.065637	0.171241	-0.0139411	0.162375	-0.147037	0.0695312	0.0771294	-0.00710364	0.122483	0.0145101	0.0919544	-0.0568021	0.04092	-0.00809367	0.00671551	-0.0691526	-0.0365148	-0.0725602	-0.102283	-0.0992937	-0.150168	-0.116046	0.10599	-0.179398	0.0593948	-0.293735	0.00315857	-0.3494	-0.000327252	-0.366609	-0.0458255	0.486396	0.0444844
15	r	7	wrs15rep3	0.282701	-0.0628438	0.251144	-0.0642427	0.186301	0.0674094	0.18182	-0.0177755	0.161479	-0.144949	0.076458	0.0761336	-0.0092941	0.122981	0.0106929	0.0923497	-0.0531305	0.0419924	-0.00678098	0.0140391	-0.0727609	-0.0376212	-0.0781671	-0.104218	-0.103085	-0.153153	-0.111716	0.109679	-0.175965	0.0575929	-0.294247	0.00230348	-0.353896	-0.00134822	-0.364565	-0.0446173	0.473011	0.0462872
15	r	8	wrs15rep5	0.282714	-0.058191	0.247337	-0.0591621	0.181175	0.0658959	0.171867	-0.0157813	0.169388	-0.141315	0.0734112	0.0743958	-0.00385603	0.118105	0.0134216	0.0908737	-0.0472374	0.0426283	-0.012025	0.0121337	-0.0751282	-0.0393688	-0.0832934	-0.104579	-0.104988	-0.152505	-0.121235	0.104271	-0.17912	0.061078	-0.29081	0.00729959	-0.347871	-0.000838244	-0.361737	-0.0464841	0.487985	0.0415446
15	r	9	wrs15rep4	0.278137	-0.0595554	0.23777	-0.0595433	0.196117	0.0654314	0.170391	-0.0154678	0.162971	-0.150248	0.0692847	0.0772617	-0.00554897	0.120524	0.0144239	0.0921011	-0.0549478	0.041026	-0.00820338	0.00711088	-0.0670966	-0.0343915	-0.0728528	-0.103336	-0.0975158	-0.149515	-0.117572	0.106474	-0.181293	0.0564633	-0.294891	0.00408864	-0.350411	0.000666246	-0.365819	-0.0449408	0.487058	0.0458503
15	r	10	wrs15rep5	0.278699	-0.0580913	0.246889	-0.0597217	0.180668	0.0653909	0.173164	-0.0166582	0.167121	-0.141608	0.0764312	0.0732227	-0.0038207	0.121179	0.0149389	0.0918173	-0.0481888	0.040274	-0.0129522	0.0097697	-0.0754271	-0.0381857	-0.0857039	-0.104899	-0.103488	-0.151715	-0.121586	0.105522	-0.175907	0.061643	-0.290092	0.00455394	-0.350443	-0.00115371	-0.360395	-0.0456855	0.490093	0.0443453
16	r	1	wrs16rep1	0.284298	-0.0595109	0.243885	-0.0588638	0.196409	0.0644061	0.175326	-0.0134044	0.160383	-0.147395	0.0729434	0.0758967	-0.00129241	0.120383	0.0164564	0.0918902	-0.0468767	0.0389516	-0.0123791	0.0115822	-0.0728142	-0.0344354	-0.0799353	-0.105166	-0.106176	-0.156403	-0.123479	0.104058	-0.183637	0.0598396	-0.29721	0.00352305	-0.348974	0.00221948	-0.356123	-0.0445694	0.479197	0.0469969
16	r	2	wrs16rep2	0.286498	-0.0622134	0.248967	-0.0609972	0.194101	0.0678092	0.17357	-0.0138257	0.163854	-0.147692	0.0673307	0.0755015	-0.00818848	0.119103	0.0159034	0.0896948	-0.0430895	0.0361476	-0.01881	0.0120967	-0.0704838	-0.0363222	-0.0762636	-0.10412	-0.106422	-0.151448	-0.123205	0.103155	-0.180119	0.0584829	-0.294516	0.00672835	-0.348307	0.00310572	-0.360538	-0.043015	0.479717	0.0478089
16	r	3	wrs16rep1	0.285411	-0.0579829	0.244856	-0.0591179	0.199364	0.0634935	0.176532	-0.0137846	0.160078	-0.145269	0.069131	0.0760828	-0.00305828	0.120174	0.0161429	0.0897004	-0.0482455	0.0408129	-0.0102829	0.0129725	-0.0746706	-0.0359138	-0.0797238	-0.104894	-0.105621	-0.154165	-0.124854	0.103939	-0.183038	0.0596087	-0.294194	0.0050282	-0.348132	0.000433814	-0.358858	-0.0456526	0.479164	0.0445342
16	r	4	wrs16rep3	0.284118	-0.0584706	0.251114	-0.0612143	0.187502	0.0656002	0.174589	-0.0126759	0.166394	-0.145358	0.0726735	0.076703	-0.0070308	0.120382	0.0140353	0.0920716	-0.0413639	0.0401245	-0.00430098	0.00762424	-0.0769916	-0.0378915	-0.084787	-0.0966213	-0.108575	-0.151151	-0.110992	0.107747	-0.170318	0.0625256	-0.303765	0.00255341	-0.357712	-0.000400439	-0.358321	-0.0534109	0.473732	0.0418629
16	r	5	wrs16rep2	0.286397	-0.0632123	0.248938	-0.0602607	0.192144	0.0684657	0.175134	-0.0186243	0.165768	-0.147082	0.0689943	0.0758744	-0.00833148	0.11941	0.0121618	0.0883731	-0.0448337	0.0382892	-0.0186955	0.0160131	-0.0703892	-0.0360219	-0.0760759	-0.103794	-0.106101	-0.149354	-0.1197	0.103205	-0.180097	0.0585906	-0.294424	0.00492438	-0.349915	0.00307309	-0.360349	-0.0448823	0.479375	0.0470135
16	r	6	wrs16rep4	0.286823	-0.0582791	0.250826	-0.0605335	0.187073	0.0622525	0.182706	-0.0239709	0.163618	-0.146478	0.0769305	0.0726407	-0.00524193	0.119942	0.0162089	0.0877856	-0.0540562	0.0416762	-0.0117179	0.0113144	-0.0709632	-0.0377156	-0.083077	-0.106257	-0.105972	-0.149301	-0.123443	0.104724	-0.174342	0.0643205	-0.293041	0.00394911	-0.349572	0.00362919	-0.365349	-0.0438504	0.472589	0.0541509
16	r	7	wrs16rep3	0.282799	-0.058492	0.249786	-0.0612286	0.187963	0.0651697	0.172784	-0.0144344	0.166799	-0.14584	0.0731058	0.0763034	-0.00436779	0.121323	0.0162315	0.0912239	-0.0427465	0.0402081	-0.00652683	0.0117088	-0.0779387	-0.0360438	-0.0866824	-0.0983394	-0.106471	-0.152035	-0.115931	0.108797	-0.170421	0.0604042	-0.301212	0.00353435	-0.35564	-0.00118361	-0.358037	-0.0537431	0.476506	0.0426667
16	r	8	wrs16rep5	0.288163	-0.0592278	0.247858	-0.0616239	0.193655	0.064711	0.174744	-0.0159227	0.162829	-0.148156	0.0685415	0.0742554	-0.0101531	0.118561	0.015108	0.091098	-0.0399591	0.0387589	-0.00924831	0.0108799	-0.0711491	-0.0354678	-0.0800322	-0.104096	-0.109428	-0.154744	-0.1227	0.101614	-0.182233	0.0623776	-0.29769	0.00734791	-0.347206	0.00382895	-0.358195	-0.0445767	0.477094	0.0503827
16	r	9	wrs16rep4	0.286814	-0.0590721	0.248882	-0.0611746	0.188683	0.0614553	0.184529	-0.0230621	0.165472	-0.145808	0.0766348	0.073848	-0.00606728	0.117455	0.0156167	0.0871186	-0.0528849	0.04071	-0.0123209	0.0104897	-0.0735195	-0.0384884	-0.0832235	-0.101731	-0.106488	-0.148607	-0.120566	0.103663	-0.175277	0.0635066	-0.293989	0.00482796	-0.350801	0.00260725	-0.364537	-0.0432753	0.473042	0.0555377
16	r	10	wrs16rep5	0.289595	-0.0586684	0.249261	-0.0594208	0.194045	0.0635819	0.17552	-0.0156503	0.16397	-0.15031	0.0668065	0.0764208	-0.00902532	0.116684	0.0129467	0.0912925	-0.0422677	0.0366849	-0.0127382	0.0144076	-0.0731503	-0.0361638	-0.081787	-0.105118	-0.109014	-0.152592	-0.123534	0.102972	-0.181466	0.0613717	-0.295362	0.00550092	-0.346762	0.00371377	-0.355645	-0.0432522	0.478607	0.0485453
17	r	1	wrs17rep1	0.280618	-0.0590821	0.248464	-0.0622665	0.196525	0.0693189	0.176798	-0.0173991	0.149787	-0.150488	0.0658985	0.0792548	-0.00950393	0.124408	0.0142088	0.0906969	-0.0569464	0.0435504	-0.0142855	0.0121496	-0.0725261	-0.0378535	-0.0740501	-0.107186	-0.0964046	-0.154289	-0.114278	0.104225	-0.171948	0.061683	-0.296352	0.00544904	-0.345445	0.0016744	-0.364346	-0.0494419	0.483787	0.0455956
17	r	2	wrs17rep2	0.274842	-0.0607605	0.238509	-0.0607095	0.182483	0.0704534	0.173928	-0.0170559	0.153054	-0.15553	0.073986	0.0801447	-0.00182926	0.12823	0.0211028	0.0925709	-0.0485219	0.0427849	-0.00281029	0.00398282	-0.0682123	-0.0383874	-0.0739385	-0.108835	-0.105319	-0.158773	-0.103935	0.114624	-0.164235	0.0605188	-0.297294	0.00460089	-0.35311	-0.00194066	-0.376754	-0.0503846	0.478056	0.054466
17	r	3	wrs17rep1	0.282264	-0.0589854	0.248035	-0.0638048	0.194516	0.068285	0.174808	-0.0147813	0.150819	-0.152038	0.0674426	0.0783095	-0.00982166	0.123894	0.0121143	0.0920773	-0.0556993	0.0428932	-0.0150738	0.00960173	-0.0732532	-0.0365822	-0.0768423	-0.105874	-0.0959241	-0.15702	-0.112805	0.105693	-0.170687	0.0632458	-0.295449	0.00727167	-0.344926	-0.00010663	-0.363853	-0.0493841	0.484334	0.0473041
17	r	4	wrs17rep3	0.278794	-0.0582401	0.244463	-0.06068	0.18942	0.0653206	0.184717	-0.0183806	0.163783	-0.142489	0.0680438	0.0739445	-0.0130982	0.122479	0.00937873	0.0880691	-0.0477565	0.0398918	-0.0107757	0.00998339	-0.0698926	-0.0379865	-0.0786865	-0.103221	-0.0997123	-0.151146	-0.115143	0.105037	-0.178015	0.0594625	-0.287743	0.00673539	-0.352641	-0.00054025	-0.369078	-0.0429309	0.483942	0.044691
17	r	5	wrs17rep2	0.277323	-0.0628769	0.239091	-0.0609011	0.182726	0.0723585	0.172245	-0.0191031	0.155659	-0.154338	0.075658	0.0779034	-0.00427103	0.126127	0.0209074	0.0941544	-0.0508775	0.0403671	-0.00466964	0.00730568	-0.0664102	-0.0374247	-0.0758063	-0.107858	-0.101419	-0.158287	-0.104779	0.110243	-0.162893	0.0614969	-0.298153	0.00332543	-0.355899	-0.00135313	-0.375472	-0.046347	0.477039	0.0552069
17	r	6	wrs17rep4	0.285413	-0.0605554	0.246237	-0.0588779	0.190288	0.0644103	0.182618	-0.0169018	0.159991	-0.148072	0.0792233	0.0738796	-0.00767229	0.122085	0.0184625	0.0908744	-0.0439617	0.0386008	-0.0116884	0.0100031	-0.0712777	-0.0371601	-0.0813437	-0.101099	-0.108681	-0.146766	-0.125301	0.106455	-0.179779	0.0564585	-0.291148	0.00392418	-0.352348	-0.0015641	-0.364131	-0.0444973	0.4751	0.0488021
17	r	7	wrs17rep3	0.278923	-0.0555905	0.244387	-0.0599366	0.187652	0.0663532	0.186522	-0.0197135	0.163767	-0.139565	0.0700851	0.072834	-0.0131181	0.119758	0.00969878	0.089272	-0.0455412	0.0410229	-0.0106178	0.0112546	-0.0682592	-0.040745	-0.0807322	-0.101556	-0.102276	-0.153383	-0.110784	0.106082	-0.175927	0.0588871	-0.291676	0.00704471	-0.354588	-0.000299164	-0.369341	-0.0448325	0.481826	0.0431141
17	r	8	wrs17rep5	0.281665	-0.0601637	0.251733	-0.0635609	0.193116	0.0639746	0.175067	-0.0165404	0.160908	-0.150999	0.0749519	0.075969	-0.00991782	0.116712	0.00892662	0.0921005	-0.0510291	0.0429405	-0.00526864	0.0129157	-0.065464	-0.0380531	-0.0797829	-0.104322	-0.108475	-0.153944	-0.122152	0.103969	-0.177285	0.063379	-0.295289	0.00718287	-0.347426	0.00304668	-0.361395	-0.0466863	0.477118	0.0520797
17	r	9	wrs17rep4	0.282495	-0.0623161	0.247061	-0.0613012	0.190217	0.0656003	0.180377	-0.0169304	0.158088	-0.145876	0.0776865	0.0754395	-0.00857861	0.125355	0.0200631	0.0881151	-0.0436693	0.0381847	-0.0111712	0.0114677	-0.0727531	-0.0369904	-0.0810122	-0.101067	-0.10829	-0.146581	-0.122574	0.107346	-0.178723	0.057871	-0.286837	0.00125756	-0.352945	-0.00135287	-0.367204	-0.0474301	0.47777	0.0492087
17	r	10	wrs17rep5	0.282809	-0.062399	0.253449	-0.0622036	0.191292	0.0653586	0.176504	-0.0190069	0.160942	-0.151018	0.0714417	0.0756432	-0.00911643	0.119317	0.00741194	0.0914275	-0.0487047	0.0418912	-0.00690637	0.0106718	-0.0648268	-0.0386258	-0.0808461	-0.104464	-0.109167	-0.152153	-0.121466	0.102904	-0.181566	0.0649084	-0.293739	0.00806801	-0.345949	0.00209354	-0.359592	-0.0456929	0.47803	0.0532793
18	r	1	wrs18rep1	0.286441	-0.0568014	0.251246	-0.0592943	0.189199	0.0629734	0.180099	-0.0164848	0.16046	-0.145851	0.0711963	0.0718773	-0.00715307	0.115679	0.0166282	0.0885586	-0.0538098	0.0432224	-0.00867361	0.01133	-0.0721605	-0.0367956	-0.0849268	-0.102907	-0.106267	-0.151331	-0.117328	0.101493	-0.175728	0.0636702	-0.299298	0.00547146	-0.35299	0.0018551	-0.355835	-0.0454454	0.478901	0.0487805
18	r	2	wrs18rep2	0.281817	-0.058904	0.251104	-0.0588287	0.188786	0.0664703	0.179082	-0.0130756	0.166735	-0.143654	0.0739332	0.0738584	-0.00562963	0.120069	0.0122256	0.0913882	-0.0570791	0.0421564	-0.0119133	0.00870998	-0.0742305	-0.0427232	-0.0842201	-0.10489	-0.110677	-0.152259	-0.114309	0.104379	-0.172675	0.0593832	-0.287681	0.0053452	-0.351305	-0.00149202	-0.363974	-0.0416843	0.480011	0.0457516
18	r	3	wrs18rep1	0.286915	-0.0558334	0.250055	-0.0580351	0.188353	0.0638403	0.179211	-0.0153162	0.162859	-0.146476	0.0728354	0.0743675	-0.00543179	0.116289	0.0159465	0.0859093	-0.0524816	0.040559	-0.00754254	0.00874139	-0.0741776	-0.0368565	-0.0833741	-0.103209	-0.106226	-0.149392	-0.12084	0.101213	-0.175475	0.0630881	-0.298643	0.00522164	-0.351893	0.00346221	-0.358606	-0.0449567	0.478516	0.0473835
18	r	4	wrs18rep3	0.286617	-0.0634136	0.25019	-0.0644489	0.17849	0.0643745	0.174535	-0.0162794	0.173371	-0.147173	0.0621586	0.0765859	-0.00346188	0.119998	0.00988325	0.0933745	-0.0679498	0.0470782	-0.00738909	0.012711	-0.0694042	-0.0380877	-0.0811588	-0.0994031	-0.104485	-0.147911	-0.11675	0.102822	-0.170485	0.0610675	-0.291282	0.00418765	-0.346048	-0.00113284	-0.363089	-0.047626	0.48626	0.0432768
18	r	5	wrs18rep2	0.283019	-0.0576863	0.249966	-0.0587576	0.187212	0.0650415	0.177374	-0.0145862	0.167113	-0.14411	0.0727857	0.0743636	-0.00386058	0.117896	0.0150803	0.0926495	-0.054938	0.041717	-0.0109632	0.0104623	-0.0739891	-0.0426851	-0.0840866	-0.104911	-0.111202	-0.154046	-0.11794	0.104017	-0.172396	0.0596966	-0.285877	0.0052163	-0.350783	0.000770723	-0.366384	-0.042393	0.479867	0.047345
18	r	6	wrs18rep4	0.275766	-0.0518754	0.238762	-0.0571672	0.185202	0.0678946	0.179416	-0.0204774	0.155623	-0.148192	0.0776099	0.07494	-0.000564496	0.118649	0.022523	0.0881956	-0.0559152	0.0393063	-0.00426619	0.0031271	-0.0685113	-0.0351217	-0.0767565	-0.102111	-0.110508	-0.14621	-0.117339	0.103141	-0.172233	0.0604258	-0.295621	0.00290407	-0.355677	-0.000881952	-0.366382	-0.0464883	0.488869	0.0499417
18	r	7	wrs18rep3	0.285559	-0.0595954	0.246443	-0.0636326	0.180653	0.0652227	0.177449	-0.0192931	0.172763	-0.14895	0.0610246	0.0784293	-0.00496807	0.120017	0.0118568	0.0924403	-0.06409	0.0457404	-0.00539499	0.0119262	-0.0690589	-0.038272	-0.0830564	-0.100728	-0.104592	-0.149645	-0.118554	0.101133	-0.171697	0.0612176	-0.292283	0.00445838	-0.34695	-0.000844987	-0.361213	-0.0442422	0.48611	0.0446184
18	r	8	wrs18rep5	0.285459	-0.0629355	0.252115	-0.0612179	0.179717	0.0640498	0.177163	-0.0197921	0.162528	-0.14726	0.0714422	0.0733672	-0.0050701	0.122738	0.0125958	0.0915423	-0.0571503	0.0432188	-0.00915098	0.0130149	-0.0763742	-0.0397624	-0.0837855	-0.107227	-0.103333	-0.150666	-0.111866	0.103465	-0.169212	0.0592224	-0.290907	0.0064962	-0.353805	0.00324834	-0.36162	-0.0453161	0.481253	0.053813
18	r	9	wrs18rep4	0.274857	-0.0542157	0.240057	-0.0557285	0.186393	0.0635502	0.178921	-0.0188396	0.154919	-0.146381	0.0753469	0.0748782	-0.00253941	0.120602	0.0223874	0.0900089	-0.0579793	0.0414421	-0.00644832	0.00520501	-0.0669911	-0.0350622	-0.0773972	-0.103757	-0.107489	-0.149925	-0.117435	0.103277	-0.170433	0.0605766	-0.295718	0.00346781	-0.355849	-0.00212255	-0.36458	-0.0458741	0.489977	0.0488969
18	r	10	wrs18rep5	0.284486	-0.0610147	0.248928	-0.0605674	0.182722	0.0666736	0.177482	-0.0201419	0.167338	-0.145041	0.0735225	0.0724721	-0.0051992	0.120543	0.0134328	0.0928515	-0.0554953	0.040559	-0.010512	0.0130879	-0.0742081	-0.0406512	-0.0820818	-0.109835	-0.106842	-0.151815	-0.114954	0.103959	-0.170522	0.0592365	-0.292639	0.00475611	-0.35106	0.00401631	-0.363609	-0.0413402	0.47921	0.0522513
19	r	1	wrs19rep1	0.283679	-0.0565013	0.251674	-0.0571117	0.192986	0.0638134	0.179781	-0.0187173	0.167802	-0.144658	0.0708498	0.0691339	-0.00864022	0.120835	0.0103477	0.087554	-0.051634	0.038962	-0.011886	0.0131053	-0.0773493	-0.0345325	-0.0875352	-0.0991627	-0.108804	-0.149525	-0.112423	0.104278	-0.164579	0.0642307	-0.30181	0.00064951	-0.346968	-0.000111715	-0.363793	-0.0479428	0.478301	0.0457008
19	r	2	wrs19rep2	0.28238	-0.0562094	0.254038	-0.0591112	0.188144	0.0650456	0.180888	-0.0158786	0.162414	-0.147039	0.0659123	0.0762511	-0.0140491	0.122059	0.01121	0.0911027	-0.0483605	0.0416385	-0.00478932	0.00764878	-0.0711651	-0.0392402	-0.0817815	-0.103326	-0.108547	-0.15352	-0.109098	0.107415	-0.165677	0.0607125	-0.306201	0.00295615	-0.349451	0.00179795	-0.361727	-0.0460938	0.47586	0.0437905
19	r	3	wrs19rep1	0.283568	-0.0566935	0.253291	-0.0577572	0.192453	0.0619999	0.183617	-0.0180278	0.167575	-0.144797	0.0694852	0.0713777	-0.0114309	0.117937	0.00549048	0.0908069	-0.0478476	0.0398543	-0.013805	0.0136474	-0.0758488	-0.0349147	-0.0883079	-0.100827	-0.111366	-0.150716	-0.112572	0.104458	-0.164303	0.0661752	-0.298632	-2.19626e-05	-0.346029	-0.00201278	-0.363684	-0.0458899	0.478349	0.0454008
19	r	4	wrs19rep3	0.283788	-0.0595908	0.247906	-0.0562923	0.18367	0.0623611	0.175556	-0.0144907	0.172956	-0.140908	0.0694293	0.0687007	-0.00818739	0.117595	0.0101629	0.0863315	-0.0526887	0.0423531	-0.00962543	0.00742502	-0.0731614	-0.0326639	-0.0789424	-0.0954608	-0.106733	-0.1517	-0.113416	0.10466	-0.166475	0.0688231	-0.297288	0.000842234	-0.355322	-0.00216897	-0.365036	-0.0472059	0.483406	0.041391
19	r	5	wrs19rep2	0.280683	-0.0597119	0.256033	-0.0581706	0.18684	0.0669234	0.184098	-0.0174244	0.162988	-0.145289	0.0636248	0.0746386	-0.013825	0.121345	0.0103319	0.0928176	-0.0463099	0.0404645	-0.00686417	0.00616789	-0.069013	-0.0402256	-0.0806241	-0.10182	-0.110275	-0.154658	-0.110328	0.107326	-0.1661	0.0624053	-0.306881	0.00301784	-0.348327	0.00119727	-0.361602	-0.0442438	0.475551	0.0452394
19	r	6	wrs19rep4	0.279127	-0.0571827	0.250765	-0.0590985	0.183028	0.0678038	0.182765	-0.0202302	0.167754	-0.149437	0.0680787	0.0772017	-0.0104947	0.121198	0.0140098	0.0936351	-0.0455235	0.039579	0.000608397	0.0054447	-0.0687698	-0.0379594	-0.081119	-0.103803	-0.113889	-0.153861	-0.115438	0.106802	-0.169841	0.0633157	-0.304985	0.00414904	-0.35041	0.000714187	-0.360114	-0.0448642	0.474448	0.046592
19	r	7	wrs19rep3	0.285013	-0.0576524	0.249781	-0.0583149	0.181841	0.0613297	0.177268	-0.0166203	0.17204	-0.140479	0.0696632	0.0686328	-0.00813667	0.117417	0.0124935	0.0873531	-0.0508325	0.0415038	-0.00934702	0.00712894	-0.0757553	-0.0304377	-0.0802174	-0.0955073	-0.105224	-0.148975	-0.115643	0.103055	-0.167488	0.0648758	-0.295795	0.00502629	-0.355385	-0.00319355	-0.36671	-0.0477972	0.482435	0.0426552
19	r	8	wrs19rep5	0.2811	-0.0579945	0.246206	-0.0590818	0.197503	0.066762	0.175532	-0.0171898	0.16356	-0.147237	0.0673926	0.0750584	-0.00695781	0.117033	0.0144653	0.089042	-0.041757	0.0351924	-0.00927564	0.00879604	-0.0745017	-0.0375246	-0.083216	-0.101574	-0.11183	-0.152345	-0.108134	0.10635	-0.156706	0.0670071	-0.303091	0.000416059	-0.352705	-0.00219289	-0.371946	-0.0439969	0.474362	0.0534797
19	r	9	wrs19rep4	0.280019	-0.0565847	0.251728	-0.0586006	0.183441	0.0659304	0.183736	-0.0200698	0.167164	-0.150648	0.068714	0.0748835	-0.0132891	0.120797	0.0131004	0.0931517	-0.0442628	0.0387641	0.000286516	0.00694761	-0.0687759	-0.0366157	-0.0808545	-0.102358	-0.111528	-0.152658	-0.111964	0.109022	-0.1716	0.0661313	-0.306688	0.00292273	-0.348324	-0.00113866	-0.363353	-0.0459514	0.472451	0.0460742
19	r	10	wrs19rep5	0.280445	-0.0580564	0.245515	-0.0592141	0.198342	0.066633	0.174647	-0.0192523	0.16479	-0.147664	0.0698757	0.0728095	-0.00640234	0.118386	0.0113963	0.0886437	-0.0410046	0.0400566	-0.0103764	0.0082285	-0.0737456	-0.0383076	-0.0842122	-0.104241	-0.11085	-0.151492	-0.109536	0.105691	-0.154415	0.0661366	-0.30262	0.00105374	-0.352247	0.000177039	-0.373331	-0.0453437	0.47373	0.0557566
20	r	1	wrs20rep1	0.286784	-0.0590501	0.241214	-0.0558417	0.200645	0.0643445	0.185407	-0.0181732	0.155835	-0.144622	0.0761478	0.0700198	0.0105141	0.0895934	-0.0129057	0.124262	-0.0598048	0.040519	-0.00994974	0.00867711	-0.0763118	-0.0338388	-0.079452	-0.0969934	-0.100764	-0.150296	-0.116349	0.105639	-0.179192	0.0619854	-0.29692	0.005146	-0.348317	-0.00333778	-0.359723	-0.0501683	0.483143	0.0421348
20	r	2	wrs20rep2	0.285106	-0.0579315	0.250466	-0.0585321	0.197263	0.0645599	0.185896	-0.0158826	0.16262	-0.145765	0.0712918	0.0733204	-0.00788997	0.117543	0.0181334	0.0888132	-0.05032	0.0402101	-0.016987	0.0116045	-0.078218	-0.0332274	-0.08984	-0.0990798	-0.103648	-0.144913	-0.127949	0.100876	-0.181922	0.0579927	-0.281269	0.00156222	-0.350467	-0.0032833	-0.362567	-0.041799	0.480299	0.0439323
20	r	3	wrs20rep1	0.284015	-0.0602957	0.24256	-0.0564474	0.200429	0.064133	0.182815	-0.0194272	0.155479	-0.13865	0.0754831	0.0739343	-0.00880965	0.118984	0.0106193	0.0893271	-0.0585745	0.0439937	-0.0111176	0.0109943	-0.0762317	-0.0337312	-0.0799564	-0.0985358	-0.0989278	-0.150584	-0.116696	0.103785	-0.179481	0.0602404	-0.297057	0.00354922	-0.347799	-0.00315485	-0.360962	-0.0493366	0.484212	0.0412215
20	r	4	wrs20rep3	0.282337	-0.0606718	0.248416	-0.0602143	0.187621	0.0655994	0.188267	-0.0183324	0.156285	-0.139325	0.0699153	0.0761174	-0.00986555	0.118267	0.0111958	0.0911962	-0.0483726	0.0437884	-0.0130484	0.0147397	-0.0762328	-0.0361868	-0.0842912	-0.103929	-0.106368	-0.151842	-0.122551	0.103719	-0.171315	0.0633058	-0.297124	0.00251275	-0.348971	-0.00214315	-0.353174	-0.048512	0.487276	0.0419108
20	r	5	wrs20rep2	0.284754	-0.0575682	0.246475	-0.0564151	0.196979	0.0648056	0.189269	-0.0155029	0.156896	-0.143609	0.0729396	0.0735785	-0.00796338	0.115903	0.0162206	0.0871692	-0.0522298	0.0422429	-0.013435	0.0119415	-0.0782136	-0.0347382	-0.0898512	-0.0987128	-0.103611	-0.146326	-0.1297	0.0973885	-0.178194	0.0564535	-0.284755	0.00175757	-0.350316	0.000612009	-0.360486	-0.0432967	0.485221	0.0443173
20	r	6	wrs20rep4	0.283117	-0.0583395	0.248232	-0.0601141	0.196537	0.0656257	0.1841	-0.0178991	0.165439	-0.143189	0.0655531	0.0785553	-0.0123003	0.119607	0.0140555	0.0899101	-0.0544967	0.0440351	-0.016694	0.0143565	-0.0755209	-0.0366436	-0.0857042	-0.101862	-0.106212	-0.152226	-0.122085	0.10455	-0.18035	0.0609815	-0.288929	0.0036038	-0.344396	-0.00278011	-0.355189	-0.0468397	0.484844	0.0386678
20	r	7	wrs20rep3	0.284488	-0.0615956	0.247028	-0.0610532	0.188239	0.0682628	0.186968	-0.0191447	0.158457	-0.140064	0.0706093	0.077106	-0.0108254	0.12111	0.0101158	0.088691	-0.0476185	0.0449187	-0.0159163	0.0159093	-0.0755361	-0.034967	-0.0836811	-0.104431	-0.105762	-0.150503	-0.11995	0.101284	-0.172255	0.0627851	-0.298027	0.00216349	-0.348029	-0.00068083	-0.354109	-0.0505493	0.485804	0.0407572
20	r	8	wrs20rep5	0.287302	-0.0587636	0.249974	-0.0585148	0.197345	0.0624054	0.185679	-0.0181799	0.158652	-0.142675	0.0761546	0.0697274	-0.00469853	0.11702	0.0226472	0.0843013	-0.0531709	0.0383954	-0.019106	0.00922237	-0.0807408	-0.0391708	-0.08887	-0.102139	-0.106476	-0.147235	-0.113531	0.103705	-0.178051	0.0580698	-0.298439	0.00715245	-0.348655	0.00200983	-0.360602	-0.0429511	0.474586	0.0576208
20	r	9	wrs20rep4	0.283159	-0.061483	0.247038	-0.0610316	0.196145	0.0683694	0.184969	-0.0176671	0.165903	-0.145012	0.0642536	0.079393	-0.0138572	0.120415	0.0126124	0.0906898	-0.0565974	0.0428697	-0.0140788	0.0154885	-0.0769723	-0.0363191	-0.0813435	-0.101693	-0.105826	-0.1528	-0.121596	0.106294	-0.180497	0.0608023	-0.287524	0.00253851	-0.344268	-0.00166509	-0.355582	-0.0475701	0.484062	0.0383815
20	r	10	wrs20rep5	0.287262	-0.0564196	0.247276	-0.0590603	0.197506	0.0644355	0.188766	-0.0187023	0.159601	-0.144074	0.0766148	0.0717193	-0.00509269	0.115476	0.0227143	0.0845449	-0.0529076	0.0387401	-0.020625	0.0101675	-0.0803961	-0.038639	-0.0890181	-0.103156	-0.107754	-0.145918	-0.11313	0.103878	-0.178005	0.0566418	-0.29861	0.00412722	-0.348178	0.000691713	-0.360745	-0.0402312	0.474721	0.0557789
21	r	1	wrs21rep1	0.289341	-0.0610389	0.252054	-0.0627399	0.175394	0.0643089	0.173245	-0.0165481	0.160733	-0.150863	0.0592985	0.0797143	-0.00589097	0.126154	0.0122237	0.092252	-0.0512381	0.0432357	-0.00489036	0.0134414	-0.0711239	-0.0387095	-0.0835294	-0.107135	-0.112473	-0.157586	-0.106536	0.112243	-0.170476	0.0614207	-0.292702	0.00285431	-0.344593	-0.00271255	-0.362074	-0.046526	0.483237	0.0482344
21	r	2	wrs21rep2	0.278933	-0.059636	0.248643	-0.0615958	0.179727	0.0669639	0.177025	-0.0172241	0.161082	-0.148636	0.0700732	0.0765091	-0.001774	0.119032	0.0140427	0.0945739	-0.0463706	0.045558	-0.003915	0.00848173	-0.071504	-0.0377852	-0.083512	-0.105818	-0.108981	-0.160947	-0.112043	0.107992	-0.173631	0.0647522	-0.289965	0.00374109	-0.346838	-0.000628381	-0.371179	-0.0465064	0.480186	0.0511734
21	r	3	wrs21rep1	0.288128	-0.0620781	0.252735	-0.0642317	0.175025	0.0648459	0.171022	-0.015332	0.159773	-0.151597	0.064634	0.0788458	-0.00758407	0.127144	0.0109464	0.0951159	-0.0523938	0.0462614	-0.00714288	0.0128998	-0.07325	-0.0390797	-0.0820627	-0.108294	-0.11097	-0.158604	-0.10619	0.112852	-0.170008	0.0621958	-0.290653	0.00156774	-0.342422	-0.00395095	-0.363498	-0.0466828	0.483913	0.0481224
21	r	4	wrs21rep3	0.286109	-0.0588945	0.253011	-0.0615344	0.188989	0.0656079	0.173697	-0.0177065	0.16389	-0.152695	0.0707968	0.0785114	-0.00495843	0.121842	0.0111661	0.0941301	-0.0521021	0.0448022	0.00121314	0.0100683	-0.0760634	-0.0354804	-0.0862953	-0.10859	-0.110867	-0.154243	-0.114163	0.108035	-0.178462	0.0643052	-0.299754	0.00310127	-0.345838	-0.00135879	-0.354112	-0.0474741	0.473742	0.0475735
21	r	5	wrs21rep2	0.279317	-0.0604906	0.247165	-0.0621364	0.176742	0.0668753	0.177734	-0.0159342	0.16096	-0.151031	0.0691699	0.0783497	-0.000725355	0.120854	0.0147974	0.0944956	-0.0476168	0.0458673	-0.00317591	0.0102841	-0.0732187	-0.0392744	-0.0833404	-0.105669	-0.10689	-0.159119	-0.1092	0.10989	-0.175082	0.063572	-0.291154	0.00657242	-0.346891	-0.00341827	-0.369517	-0.0494684	0.480926	0.049781
21	r	6	wrs21rep4	0.284029	-0.0618475	0.252689	-0.0590956	0.170004	0.0669483	0.18197	-0.0200057	0.164062	-0.151435	0.0702095	0.0745322	-0.00441557	0.121939	0.0101503	0.0926351	-0.0453736	0.042221	-0.00486959	0.0112844	-0.0729829	-0.0365138	-0.084635	-0.101669	-0.110241	-0.152662	-0.11266	0.106876	-0.174628	0.0615553	-0.29364	0.00367949	-0.347389	-0.00205167	-0.363928	-0.0455453	0.481649	0.0491542
21	r	7	wrs21rep3	0.286286	-0.0592131	0.251402	-0.0616031	0.189407	0.0670866	0.174113	-0.0162365	0.162271	-0.152772	0.074269	0.0759294	-0.00634209	0.12358	0.013349	0.0953648	-0.0519584	0.0445	0.00111204	0.00797914	-0.0759236	-0.0357905	-0.0859083	-0.107125	-0.110732	-0.154565	-0.113526	0.111305	-0.176798	0.061975	-0.301669	0.00126576	-0.345975	-0.00344363	-0.355535	-0.0457492	0.472158	0.0475127
21	r	8	wrs21rep5	0.285251	-0.0620329	0.251554	-0.062437	0.174699	0.0690113	0.170861	-0.0163472	0.164883	-0.151822	0.0625255	0.0807212	-0.00541147	0.124843	0.00889972	0.0964739	-0.0496786	0.0438575	-0.0110803	0.0154739	-0.0702207	-0.0407875	-0.086115	-0.107467	-0.108888	-0.158136	-0.108755	0.109033	-0.169568	0.0661008	-0.291464	0.00271068	-0.342715	-0.00245641	-0.361267	-0.0500405	0.486492	0.0433007
21	r	9	wrs21rep4	0.285858	-0.0596455	0.252042	-0.0601624	0.173311	0.0665686	0.182153	-0.0176574	0.162294	-0.150271	0.0701186	0.0747413	-0.00404979	0.123746	0.00978542	0.0909299	-0.0469814	0.0427082	-0.00472194	0.0115192	-0.0712072	-0.0384412	-0.0845428	-0.10311	-0.111823	-0.153665	-0.11459	0.105345	-0.174206	0.0614563	-0.292528	0.00533062	-0.346531	-0.00225828	-0.364772	-0.0453158	0.48039	0.0481813
21	r	10	wrs21rep5	0.284943	-0.0604371	0.25459	-0.0632485	0.173947	0.0688112	0.172545	-0.0132456	0.165524	-0.156125	0.0632252	0.0783535	-0.00633727	0.124572	0.00772385	0.0943645	-0.05213	0.0456023	-0.00829064	0.0145544	-0.0723541	-0.037294	-0.085129	-0.108244	-0.111537	-0.158405	-0.105539	0.111773	-0.174231	0.066242	-0.288598	0.00343107	-0.34171	-0.00149172	-0.360806	-0.0527729	0.484164	0.043559
22	r	1	wrs22rep1	0.286351	-0.0624609	0.24977	-0.062728	0.194732	0.0719393	0.175284	-0.0146989	0.161644	-0.156559	0.0606001	0.078086	-0.00648826	0.120088	0.0135696	0.0908328	-0.0511717	0.0371617	-0.0106921	0.0123122	-0.0692871	-0.0415558	-0.0756514	-0.103997	-0.109756	-0.151056	-0.115685	0.102616	-0.174393	0.0563517	-0.293336	0.00623628	-0.349508	0.00479046	-0.362568	-0.0407761	0.476585	0.0534176
22	r	2	wrs22rep2	0.272337	-0.0580219	0.24078	-0.0589266	0.19489	0.0637719	0.17548	-0.01928	0.160915	-0.145405	0.0692963	0.0761906	-0.00400121	0.120691	0.0172259	0.0895654	-0.0520197	0.0385921	-0.00514159	0.00465931	-0.0655395	-0.0407473	-0.0728217	-0.10381	-0.105703	-0.154972	-0.11903	0.108456	-0.180519	0.0582466	-0.297363	0.00698361	-0.348719	0.0035082	-0.365801	-0.0426581	0.485736	0.0531566
22	r	3	wrs22rep1	0.289018	-0.0621005	0.250947	-0.0627123	0.194297	0.0717127	0.176043	-0.0132415	0.1599	-0.157325	0.0579548	0.0803619	-0.00536066	0.118606	0.0097301	0.0913084	-0.05065	0.0384895	-0.0109422	0.0104155	-0.070179	-0.0406271	-0.079418	-0.10376	-0.109139	-0.149939	-0.114954	0.102491	-0.173362	0.0546831	-0.291226	0.00620569	-0.350364	0.00408217	-0.360482	-0.040902	0.478187	0.0522514
22	r	4	wrs22rep3	0.27839	-0.0618477	0.244161	-0.0622331	0.184062	0.0652614	0.178257	-0.019533	0.162108	-0.142023	0.0764551	0.0719983	-0.00719953	0.121997	0.0146081	0.0911279	-0.0521814	0.0411428	-0.00400336	0.00930758	-0.0693739	-0.0414022	-0.075701	-0.106227	-0.103935	-0.15088	-0.125003	0.105301	-0.184664	0.0552501	-0.297767	0.00926793	-0.347019	0.00403626	-0.358158	-0.042204	0.486962	0.0516597
22	r	5	wrs22rep2	0.273559	-0.0586256	0.239853	-0.0600656	0.195524	0.0653184	0.173995	-0.0182893	0.161851	-0.149547	0.0696041	0.0742239	-0.00744402	0.124611	0.0156573	0.0905336	-0.0514503	0.0400456	-0.00749609	0.00426212	-0.0649464	-0.0393218	-0.0730173	-0.103738	-0.105083	-0.153595	-0.117697	0.11124	-0.182137	0.0591373	-0.29714	0.00486968	-0.347701	0.002708	-0.362108	-0.0450947	0.486176	0.0513274
22	r	6	wrs22rep4	0.276775	-0.0637757	0.243524	-0.0623178	0.202933	0.063885	0.174587	-0.0178183	0.156939	-0.148573	0.073047	0.077148	-0.000703651	0.122984	0.024537	0.0926791	-0.0557401	0.0440257	-0.0212993	0.0132408	-0.0705471	-0.0372965	-0.0743543	-0.105101	-0.10825	-0.152647	-0.115848	0.107306	-0.168561	0.0629057	-0.293977	0.000895191	-0.351311	-0.00235164	-0.368147	-0.0499715	0.476397	0.0547831
22	r	7	wrs22rep3	0.28121	-0.0622364	0.244177	-0.0612483	0.186007	0.0666951	0.178246	-0.0187277	0.162371	-0.141135	0.0756242	0.0710843	-0.00805738	0.120859	0.0123767	0.0907878	-0.0528258	0.0399868	-0.00390366	0.00970169	-0.0698014	-0.038957	-0.0752899	-0.105875	-0.107685	-0.151937	-0.122851	0.106045	-0.186605	0.0580832	-0.298112	0.00762442	-0.345165	0.00298965	-0.356197	-0.0432304	0.486483	0.0494897
22	r	8	wrs22rep5	0.275117	-0.0603518	0.241351	-0.0605825	0.191026	0.0654551	0.173577	-0.0148799	0.159422	-0.148429	0.0662598	0.076373	-0.00076057	0.123413	0.018164	0.0913879	-0.0534996	0.0401798	0.00166684	0.00342934	-0.0686751	-0.0361464	-0.0718393	-0.10692	-0.107451	-0.153891	-0.120727	0.108584	-0.182091	0.0568189	-0.293062	0.00498899	-0.351049	0.00263094	-0.363205	-0.0435487	0.485774	0.0514881
22	r	9	wrs22rep4	0.277829	-0.063864	0.244593	-0.0623196	0.203923	0.0661336	0.174069	-0.0145848	0.158234	-0.150508	0.0736551	0.0762381	-0.00125595	0.123134	0.0238978	0.0927731	-0.0582449	0.0417366	-0.0199425	0.0139036	-0.071071	-0.0390973	-0.0763586	-0.105985	-0.1086	-0.150817	-0.115979	0.105573	-0.170516	0.0643968	-0.291253	0.00138994	-0.350764	-0.00212803	-0.367718	-0.0496876	0.475503	0.0537124
22	r	10	wrs22rep5	0.27515	-0.0589883	0.241982	-0.0612999	0.193082	0.0639054	0.174276	-0.0156024	0.159503	-0.146953	0.0678365	0.0769627	-0.00254398	0.124185	0.0169267	0.090079	-0.0531842	0.0416067	-0.000167802	0.00428654	-0.0672337	-0.0388476	-0.0730931	-0.108047	-0.108511	-0.151539	-0.121095	0.108655	-0.180341	0.0575257	-0.293346	0.00520742	-0.349959	0.00211423	-0.36422	-0.0445996	0.484939	0.0513486
23	r	1	wrs23rep1	0.28264	-0.0545559	0.250056	-0.0571847	0.181207	0.0663938	0.178418	-0.0147401	0.156155	-0.153914	0.0717262	0.0807613	-0.00858783	0.12538	0.0246449	0.0930034	-0.0445448	0.042893	-0.0124343	0.0130475	-0.0774533	-0.042815	-0.095287	-0.107807	-0.120325	-0.163792	-0.0964189	0.115886	-0.163644	0.0682106	-0.290905	0.000742474	-0.351664	-0.00404519	-0.360312	-0.0555986	0.476731	0.0481338
23	r	2	wrs23rep2	0.283637	-0.0570816	0.245926	-0.0592031	0.195866	0.0674819	0.169183	-0.0140511	0.155095	-0.151615	0.0749654	0.0763209	-0.00987929	0.123201	0.0182651	0.0884112	-0.0401701	0.0407416	-0.00258883	0.00648072	-0.0749564	-0.039063	-0.084256	-0.106518	-0.105906	-0.148482	-0.124274	0.106943	-0.176468	0.0647162	-0.29094	0.00443973	-0.354674	-0.000601499	-0.359197	-0.049599	0.480372	0.0474785
23	r	3	wrs23rep1	0.281822	-0.0554475	0.249255	-0.058068	0.183582	0.0653499	0.178244	-0.0168993	0.156652	-0.154147	0.0704708	0.081107	-0.00979161	0.125718	0.0252656	0.0926638	-0.0444765	0.0438625	-0.0124993	0.010913	-0.0768067	-0.0430597	-0.0945381	-0.104899	-0.120948	-0.164543	-0.0994203	0.116934	-0.162926	0.067924	-0.290712	0.00178475	-0.35086	-0.00425514	-0.359514	-0.0557793	0.477202	0.0508399
23	r	4	wrs23rep3	0.27774	-0.0530396	0.244611	-0.0599377	0.196864	0.0679563	0.17043	-0.0134376	0.154295	-0.150419	0.0769911	0.0798536	-0.00310268	0.126391	0.0250712	0.0943276	-0.0378661	0.0403254	-0.0019922	0.00880721	-0.0737649	-0.0421914	-0.0818153	-0.107732	-0.115166	-0.155995	-0.116038	0.111072	-0.170066	0.0658779	-0.287408	0.00391113	-0.357132	0.000756546	-0.363346	-0.0523794	0.477447	0.0516052
23	r	5	wrs23rep2	0.284313	-0.0571552	0.245328	-0.0615071	0.194478	0.0686005	0.170505	-0.0159187	0.157696	-0.151027	0.0755429	0.0779495	-0.0086957	0.123015	0.0166775	0.0913765	-0.0420977	0.0379737	-0.00505108	0.00553213	-0.0750866	-0.0412367	-0.0857951	-0.103223	-0.106509	-0.148695	-0.122473	0.105048	-0.176865	0.0642343	-0.288086	0.00681549	-0.353059	-0.000439327	-0.361178	-0.0502905	0.480356	0.0489472
23	r	6	wrs23rep4	0.286648	-0.0579694	0.25245	-0.0647351	0.180115	0.0661108	0.182412	-0.0197931	0.1667	-0.149474	0.069594	0.072569	-0.011842	0.121972	0.011281	0.089261	-0.0429174	0.0403671	-0.00904906	0.0104601	-0.0724924	-0.0374404	-0.0848885	-0.102693	-0.110005	-0.148948	-0.114932	0.107117	-0.171932	0.0689573	-0.30525	0.00372426	-0.347054	-7.05262e-05	-0.355487	-0.0484724	0.476647	0.0490574
23	r	7	wrs23rep3	0.284579	-0.0568892	0.245594	-0.0612411	0.194744	0.0688664	0.170771	-0.0156527	0.157962	-0.150761	0.0758089	0.0782155	-0.00842971	0.123281	0.0169435	0.0916424	-0.0418317	0.0382397	-0.00478509	0.00579812	-0.0748206	-0.0409707	-0.0855291	-0.102957	-0.106243	-0.148429	-0.122207	0.105314	-0.176599	0.0645003	-0.28782	0.00708148	-0.352793	-0.000173338	-0.360912	-0.0500246	0.480622	0.0492131
23	r	8	wrs23rep5	0.27981	-0.0601632	0.253451	-0.0645829	0.179228	0.0714	0.177069	-0.0181811	0.15629	-0.148031	0.0731105	0.0799041	-0.00530699	0.122664	0.0102202	0.0939404	-0.0536567	0.044496	0.000768149	0.00842232	-0.0687833	-0.0426335	-0.0845966	-0.10358	-0.111013	-0.15097	-0.110813	0.103117	-0.170625	0.0609618	-0.294669	0.00301145	-0.35272	1.38539e-05	-0.360494	-0.0482131	0.48273	0.0484252
23	r	9	wrs23rep4	0.286999	-0.0581766	0.252778	-0.0649094	0.180383	0.0678906	0.182754	-0.0198731	0.165408	-0.153395	0.0698178	0.074468	-0.0132585	0.122	0.00967827	0.0910658	-0.0407988	0.0407155	-0.00860101	0.00877873	-0.0724501	-0.0354428	-0.0849207	-0.100713	-0.109934	-0.14878	-0.114594	0.107409	-0.171498	0.0674745	-0.301474	0.00449472	-0.346773	-0.00140124	-0.358896	-0.0501428	0.475381	0.048537
23	r	10	wrs23rep5	0.281543	-0.0593181	0.251463	-0.0637029	0.180272	0.0699934	0.176715	-0.0176917	0.158282	-0.149623	0.0722881	0.0799791	-0.00642189	0.120549	0.0093879	0.0956115	-0.0506441	0.0438538	0.002094	0.00807875	-0.0671863	-0.0414349	-0.0846055	-0.102398	-0.112767	-0.151711	-0.111808	0.1024	-0.173324	0.0600434	-0.297012	0.00526007	-0.351419	-7.7735e-06	-0.358986	-0.0482873	0.482128	0.0484071
24	r	1	wrs24rep1	0.284608	-0.061355	0.247905	-0.0624303	0.183756	0.0706801	0.180646	-0.0206107	0.162202	-0.152519	0.0682997	0.0785475	-0.00863381	0.125168	0.0146406	0.0943263	-0.0537918	0.0438922	-0.00539482	0.0102279	-0.0718926	-0.0411652	-0.0799181	-0.103495	-0.111159	-0.1543	-0.119675	0.110348	-0.181343	0.0589693	-0.288892	0.00503694	-0.342493	0.0014962	-0.359245	-0.0492656	0.480379	0.0464499
24	r	2	wrs24rep2	0.280523	-0.0603437	0.245913	-0.061631	0.183798	0.0682805	0.188186	-0.0234293	0.163271	-0.144681	0.0747399	0.0730538	-0.00527862	0.118206	0.0175617	0.0895636	-0.0542458	0.0405942	-0.0113201	0.00995181	-0.0752995	-0.0350649	-0.0778166	-0.101073	-0.112468	-0.15036	-0.117271	0.107042	-0.17121	0.0610269	-0.293291	0.00286488	-0.349121	-0.00104292	-0.366371	-0.0453022	0.479701	0.052344
24	r	3	wrs24rep1	0.284794	-0.0619693	0.248001	-0.0629935	0.18583	0.0695649	0.176767	-0.0190455	0.164863	-0.152201	0.0676845	0.0800359	-0.00839331	0.123978	0.0144059	0.0944795	-0.0532991	0.0459618	-0.00386298	0.00924373	-0.0720464	-0.0426617	-0.0801822	-0.105129	-0.111093	-0.152622	-0.118271	0.10977	-0.182099	0.0593238	-0.289985	0.00541921	-0.343233	0.000496954	-0.359134	-0.0484247	0.479254	0.0467735
24	r	4	wrs24rep3	0.283859	-0.0625007	0.250843	-0.0633643	0.179984	0.067648	0.178379	-0.0190363	0.165314	-0.149808	0.063669	0.078723	-0.00328489	0.120332	0.0154394	0.0922259	-0.0558314	0.0416293	-0.00749824	0.0074917	-0.0711942	-0.0451262	-0.0832785	-0.100916	-0.102963	-0.151237	-0.11741	0.108029	-0.174228	0.0554484	-0.288157	0.00530974	-0.347307	0.00361809	-0.367702	-0.0412055	0.481365	0.052739
24	r	5	wrs24rep2	0.278785	-0.0625767	0.244502	-0.0605197	0.182838	0.0673347	0.19011	-0.0226486	0.164397	-0.145194	0.0758363	0.0725712	-0.00433534	0.123147	0.0173755	0.0898823	-0.0536382	0.0421723	-0.0115061	0.0102556	-0.0742209	-0.0355752	-0.0792783	-0.0999897	-0.110116	-0.151695	-0.116209	0.106553	-0.174303	0.0595869	-0.294795	0.00395146	-0.348893	-0.00283786	-0.36534	-0.0458335	0.478791	0.0514151
24	r	6	wrs24rep4	0.28679	-0.063063	0.251374	-0.0609901	0.18655	0.0679709	0.179708	-0.0175966	0.15542	-0.155705	0.0676822	0.0772862	-0.0102674	0.124967	0.0142778	0.0934796	-0.0432783	0.038844	-0.0102102	0.0144305	-0.0812384	-0.0383698	-0.084075	-0.104574	-0.107867	-0.158313	-0.118011	0.110113	-0.176361	0.0597047	-0.287898	0.00692027	-0.343654	0.000780636	-0.35853	-0.0479943	0.479588	0.052109
24	r	7	wrs24rep3	0.285493	-0.0628081	0.249053	-0.0637294	0.178755	0.0685368	0.180003	-0.0194749	0.167086	-0.150213	0.0645494	0.0767446	-0.00312645	0.120323	0.0156221	0.0922471	-0.0555672	0.0415912	-0.00515712	0.00821935	-0.0735878	-0.0437924	-0.0849062	-0.101632	-0.104528	-0.151957	-0.117874	0.10652	-0.173958	0.0587123	-0.287769	0.00503075	-0.347573	0.00189589	-0.366555	-0.0401757	0.480042	0.0539628
24	r	8	wrs24rep5	0.279654	-0.0604774	0.247276	-0.0605784	0.17715	0.0666368	0.180735	-0.020105	0.165773	-0.148415	0.0733538	0.0725426	-0.00856325	0.119608	0.0106271	0.0889513	-0.045262	0.0397964	-0.00531269	0.00795818	-0.0682633	-0.0383131	-0.0792751	-0.101027	-0.109846	-0.147198	-0.11893	0.104737	-0.167788	0.0634893	-0.294207	0.0053998	-0.350225	-0.000584553	-0.370424	-0.0446482	0.483526	0.0522272
24	r	9	wrs24rep4	0.285434	-0.0619664	0.252524	-0.0616128	0.190181	0.0656428	0.178728	-0.018624	0.156173	-0.154245	0.0675263	0.0775105	-0.00872939	0.127697	0.0132543	0.0924412	-0.0438434	0.0411569	-0.00825459	0.0150312	-0.0788853	-0.0399014	-0.0829675	-0.105259	-0.11098	-0.159808	-0.120313	0.109912	-0.179062	0.0615995	-0.288953	0.00581887	-0.343002	0.00218071	-0.356217	-0.0495737	0.477385	0.0519991
24	r	10	wrs24rep5	0.280963	-0.0599382	0.249007	-0.0620471	0.176662	0.0669424	0.178825	-0.0189622	0.166097	-0.148874	0.0728963	0.0730571	-0.00891031	0.12028	0.0127055	0.0879327	-0.0457633	0.0405567	-0.00464075	0.00781538	-0.0664277	-0.0391482	-0.0792265	-0.0989266	-0.109467	-0.147101	-0.117207	0.100659	-0.169047	0.0632471	-0.295142	0.00335082	-0.351995	0.0016278	-0.371034	-0.0432151	0.481705	0.0527441
25	r	1	wrs25rep1	0.279659	-0.0591917	0.243158	-0.0595695	0.178381	0.0681451	0.179777	-0.0197972	0.158302	-0.146445	0.078937	0.0764275	-0.00262462	0.121401	0.0189941	0.0921008	-0.0438976	0.0373051	-0.00733663	0.00864795	-0.0680834	-0.0403692	-0.0792762	-0.107004	-0.106375	-0.151878	-0.111032	0.108641	-0.175865	0.0642353	-0.29981	0.00231584	-0.351708	-0.00201855	-0.369646	-0.0441028	0.478445	0.0511569
25	r	2	wrs25rep2	0.273177	-0.0596009	0.241313	-0.0617016	0.174222	0.0630739	0.177584	-0.0289426	0.148416	-0.142605	0.0725526	0.0671442	-0.00392796	0.115753	0.0150002	0.0878611	-0.0487725	0.0386469	-0.00496725	0.00697784	-0.0689829	-0.0481339	-0.088443	-0.103506	-0.113402	-0.157881	-0.114109	0.102196	-0.180852	0.0560289	-0.30376	-0.00323873	-0.352388	-0.00274684	-0.374158	-0.0546739	0.474804	0.0503555
25	r	3	wrs25rep1	0.275232	-0.0607374	0.241892	-0.0616423	0.170691	0.0628419	0.178496	-0.0243094	0.148734	-0.144208	0.0796134	0.0668304	-0.00316572	0.116928	0.0229384	0.0831338	-0.050759	0.0347355	-0.00111693	0.00258333	-0.0740604	-0.0440707	-0.0894142	-0.112335	-0.118465	-0.155863	-0.117844	0.10634	-0.185996	0.0550283	-0.314134	-0.000874274	-0.355885	-0.0106207	-0.370399	-0.050537	0.473292	0.0412561
25	r	4	wrs25rep3	0.279659	-0.0591917	0.243158	-0.0595695	0.178381	0.0681451	0.179777	-0.0197972	0.158302	-0.146445	0.078937	0.0764275	-0.00262462	0.121401	0.0189941	0.0921008	-0.0438976	0.0373051	-0.00733663	0.00864795	-0.0680834	-0.0403692	-0.0792762	-0.107004	-0.106375	-0.151878	-0.111032	0.108641	-0.175865	0.0642353	-0.29981	0.00231584	-0.351708	-0.00201855	-0.369646	-0.0441028	0.478445	0.0511569
25	r	5	wrs25rep2	0.272547	-0.0587109	0.236403	-0.0709416	0.173242	0.0624839	0.172024	-0.0207926	0.156986	-0.144425	0.0733826	0.0692942	-0.00532796	0.118473	0.0202202	0.0918511	-0.0493025	0.0338969	-0.00208725	0.000117835	-0.0720829	-0.0493339	-0.079593	-0.106416	-0.119312	-0.156581	-0.111999	0.0986858	-0.178862	0.0586789	-0.31165	-0.00636873	-0.353268	-0.00155684	-0.377448	-0.0522039	0.473864	0.0502355
25	r	6	wrs25rep4	0.271841	-0.0659362	0.243528	-0.067217	0.172887	0.0608585	0.178339	-0.021458	0.151251	-0.14518	0.0775272	0.0686688	-0.00958336	0.119598	0.0219948	0.0900757	-0.0484279	0.0330715	0.00113736	0.00776244	-0.0707883	-0.0444493	-0.0839584	-0.101962	-0.119548	-0.154336	-0.117145	0.10582	-0.175797	0.0569835	-0.303105	-0.00189413	-0.354433	-0.00514224	-0.371323	-0.0492693	0.476189	0.0476701
25	r	7	wrs25rep3	0.270646	-0.0576816	0.238083	-0.0680124	0.179281	0.0656632	0.180543	-0.0254734	0.157796	-0.139675	0.0744318	0.0690834	-0.00370876	0.122892	0.0186294	0.0879403	-0.0402833	0.0321061	-0.00578804	0.00863704	-0.0676537	-0.0487147	-0.0862638	-0.105277	-0.114673	-0.152541	-0.11061	0.107445	-0.173632	0.0567681	-0.30109	4.72897e-07	-0.357969	-0.00731764	-0.371829	-0.0493847	0.477043	0.0505147
25	r	8	wrs25rep5	0.277912	-0.0609392	0.24141	-0.061317	0.176633	0.0663976	0.178029	-0.0215447	0.156555	-0.148193	0.0771895	0.07468	-0.00437213	0.119654	0.0172466	0.0903532	-0.0456451	0.0355576	-0.00908414	0.00690045	-0.0698309	-0.0421167	-0.0810237	-0.108752	-0.108122	-0.153626	-0.112779	0.106894	-0.177612	0.0624878	-0.301557	0.000568334	-0.353456	-0.00376606	-0.371394	-0.0458503	0.476698	0.0494094
25	r	9	wrs25rep4	0.270931	-0.0656762	0.241778	-0.067927	0.173667	0.0615185	0.180919	-0.025748	0.149691	-0.13949	0.0747272	0.0742388	-0.00850336	0.120338	0.0195548	0.0872957	-0.0494979	0.0364115	-0.00446264	-0.000967562	-0.0723583	-0.0461393	-0.0867584	-0.104352	-0.119968	-0.149036	-0.118945	0.10858	-0.177107	0.0573435	-0.310145	-0.00635413	-0.356693	-0.00297224	-0.372773	-0.0562293	0.471689	0.0437301
25	r	10	wrs25rep5	0.28852	-0.0572452	0.242855	-0.0584879	0.180011	0.0691952	0.176167	-0.0238726	0.157986	-0.143289	0.0774611	0.0776863	-0.00234159	0.124845	0.0184554	0.0944244	-0.0421595	0.0346269	-0.00684714	0.00695314	-0.0665125	-0.0408584	-0.0775329	-0.107372	-0.102793	-0.149743	-0.110088	0.109801	-0.17552	0.0641167	-0.299448	0.00413156	-0.352455	0.000531485	-0.368635	-0.0444126	0.479845	0.0508363
26	r	1	wrs26rep1	0.279368	-0.0600045	0.242023	-0.0602743	0.18134	0.0681395	0.18198	-0.021488	0.164208	-0.146737	0.084158	0.0767771	-0.000189407	0.120989	0.0130632	0.0968031	-0.0519031	0.042183	0.00437563	0.00524381	-0.0718654	-0.0382599	-0.0825836	-0.105563	-0.106537	-0.150556	-0.123286	0.101431	-0.169697	0.0618757	-0.30189	0.00863243	-0.352271	0.0026685	-0.364952	-0.0515721	0.474658	0.0497107
26	r	2	wrs26rep2	0.28772	-0.0590903	0.250064	-0.0601056	0.172717	0.0675343	0.183772	-0.0205803	0.161845	-0.148	0.0707108	0.0738468	-0.0116449	0.118011	0.00826024	0.0920909	-0.0545548	0.0429268	-0.00615789	0.0083598	-0.0683458	-0.0371648	-0.0738536	-0.101814	-0.0929263	-0.147264	-0.115269	0.103984	-0.174382	0.0654216	-0.310109	0.00632303	-0.348409	0.0016677	-0.360509	-0.046851	0.481072	0.040705
26	r	3	wrs26rep1	0.280089	-0.058329	0.244535	-0.0623392	0.181752	0.068291	0.184279	-0.0197141	0.164632	-0.147218	0.082402	0.0787839	-0.00220626	0.123101	0.0148479	0.0970054	-0.0502787	0.0403349	-0.00132334	0.00511818	-0.0721485	-0.0403627	-0.0829076	-0.104122	-0.10689	-0.152997	-0.120031	0.101621	-0.174065	0.0637533	-0.299117	0.00663079	-0.351542	0.00436417	-0.364231	-0.051912	0.472204	0.0479913
26	r	4	wrs26rep3	0.286385	-0.0615055	0.251181	-0.0626957	0.181001	0.0692365	0.180849	-0.0203042	0.157667	-0.151585	0.0730749	0.0776537	-0.00440807	0.124883	0.0131048	0.0953108	-0.0581311	0.0424188	-0.0119177	0.00905556	-0.0769103	-0.0407678	-0.0874186	-0.105579	-0.114787	-0.150641	-0.107712	0.109325	-0.164546	0.0623169	-0.291386	0.00119595	-0.344572	-0.00345967	-0.362118	-0.0478714	0.480644	0.0530123
26	r	5	wrs26rep2	0.288987	-0.0575485	0.249244	-0.0599976	0.174025	0.0673039	0.184601	-0.0225388	0.164297	-0.15008	0.0691556	0.0780476	-0.0115238	0.120168	0.00799695	0.0924292	-0.0536411	0.0394863	-0.00291543	0.00819395	-0.0687372	-0.0365358	-0.0764813	-0.102597	-0.0956085	-0.147958	-0.117176	0.104836	-0.174783	0.0642919	-0.308632	0.00518374	-0.348392	0.00273165	-0.358744	-0.0460228	0.478327	0.0406066
26	r	6	wrs26rep4	0.28564	-0.0658415	0.244365	-0.0647163	0.186266	0.0645174	0.178885	-0.0136683	0.154747	-0.153859	0.0730338	0.0779321	-0.00773405	0.12703	0.0163695	0.0921762	-0.0533395	0.0439654	-0.00674101	0.00832833	-0.0727387	-0.0403209	-0.0822927	-0.10507	-0.110505	-0.15255	-0.114764	0.113358	-0.166136	0.0610956	-0.297442	0.00136285	-0.346587	-0.00034484	-0.35995	-0.0495829	0.478922	0.0561888
26	r	7	wrs26rep3	0.283744	-0.0626114	0.252296	-0.0642586	0.182185	0.0680692	0.180481	-0.0175731	0.15895	-0.14935	0.0740431	0.0766824	-0.00544265	0.124396	0.0120595	0.0947318	-0.0574983	0.0415894	-0.00932665	0.00782266	-0.076455	-0.0417426	-0.0890085	-0.106417	-0.118425	-0.151274	-0.106819	0.110635	-0.166024	0.0619614	-0.290804	0.00449603	-0.344367	-0.00199774	-0.36062	-0.050563	0.481033	0.0554039
26	r	8	wrs26rep5	0.277953	-0.0529664	0.242279	-0.0556907	0.19162	0.0636198	0.179448	-0.0179209	0.166263	-0.144161	0.0762853	0.0726993	-0.00495985	0.116052	0.0195179	0.0917001	-0.0513262	0.0393015	-0.00353349	0.00450072	-0.0691401	-0.0411257	-0.0832436	-0.102765	-0.100028	-0.14826	-0.118359	0.105227	-0.174574	0.0577501	-0.299883	0.00632683	-0.359586	0.000532841	-0.365863	-0.0411793	0.47713	0.046359
26	r	9	wrs26rep4	0.285257	-0.0639075	0.245784	-0.0629669	0.187493	0.0646363	0.181228	-0.0194459	0.156187	-0.150299	0.0743378	0.0800245	-0.00880202	0.125764	0.0138913	0.0947793	-0.0529044	0.0405438	-0.00790785	0.00689729	-0.0735945	-0.0380468	-0.0832167	-0.102877	-0.108014	-0.1527	-0.114133	0.111943	-0.170971	0.0621742	-0.296936	0.00180466	-0.348229	-0.00149962	-0.357714	-0.0493801	0.478243	0.0525559
26	r	10	wrs26rep5	0.27994	-0.0534557	0.23836	-0.0569252	0.196092	0.0643856	0.18131	-0.020335	0.166982	-0.142156	0.0754133	0.0745904	-0.00488593	0.121613	0.0180465	0.0898176	-0.0522764	0.0394391	-0.00273513	0.00433543	-0.0682007	-0.0411619	-0.0826607	-0.104524	-0.10467	-0.146923	-0.117257	0.10486	-0.175227	0.0578833	-0.300626	0.00474862	-0.355702	0.0019937	-0.366834	-0.0444973	0.474931	0.0463112
27	r	1	wrs27rep1	0.280585	-0.0582977	0.246817	-0.0587189	0.181476	0.0672158	0.185361	-0.0215386	0.157322	-0.146652	0.0741243	0.0728316	-0.00554882	0.121306	0.0164663	0.0923759	-0.0500629	0.0426744	-0.00578574	0.0128299	-0.06948	-0.0412054	-0.0797687	-0.108284	-0.105652	-0.15152	-0.117397	0.105409	-0.173839	0.0592105	-0.297523	0.00462403	-0.350718	0.000782072	-0.36547	-0.0429104	0.479095	0.0498673
27	r	2	wrs27rep2	0.279629	-0.0537159	0.252919	-0.0572865	0.176662	0.060471	0.187098	-0.0214698	0.161831	-0.143068	0.0767152	0.0676159	-0.00553331	0.118917	0.0176407	0.0856085	-0.0510769	0.0376921	-0.00878866	0.00719304	-0.0751407	-0.0373303	-0.0845165	-0.101409	-0.100108	-0.144013	-0.119929	0.103867	-0.175034	0.0595682	-0.302913	0.003481	-0.351591	0.00311965	-0.361684	-0.0402863	0.483821	0.0510456
27	r	3	wrs27rep1	0.281231	-0.0572039	0.243481	-0.0588141	0.184784	0.0654913	0.184366	-0.0186206	0.156053	-0.147527	0.0773288	0.0706977	-0.00581318	0.121432	0.0145356	0.0929332	-0.0486306	0.0404061	-0.0038368	0.0125043	-0.0705922	-0.0392856	-0.0770402	-0.107191	-0.101718	-0.154518	-0.118053	0.103297	-0.175418	0.0608036	-0.297189	0.00533017	-0.355795	0.00238458	-0.365004	-0.042503	0.477311	0.0503823
27	r	4	wrs27rep3	0.277515	-0.05892	0.239474	-0.0627077	0.174226	0.0692915	0.176653	-0.0191122	0.162701	-0.148134	0.070784	0.0766073	-0.00300219	0.123047	0.0159522	0.0908258	-0.0422022	0.039585	0.000105353	0.00715897	-0.0721859	-0.038465	-0.080109	-0.106629	-0.0970395	-0.156855	-0.110296	0.107955	-0.175278	0.0604379	-0.294351	0.00743606	-0.356691	0.000197161	-0.369892	-0.0431956	0.483636	0.0514768
27	r	5	wrs27rep2	0.281494	-0.0545386	0.253189	-0.0559712	0.178581	0.0599354	0.185244	-0.0215746	0.161325	-0.145376	0.0769699	0.069341	-0.00766939	0.117435	0.0157525	0.085883	-0.051015	0.0395759	-0.0105555	0.00924843	-0.0739306	-0.0394295	-0.0828728	-0.0999056	-0.100648	-0.144096	-0.119847	0.105931	-0.169861	0.059021	-0.304007	0.000212382	-0.352199	0.00358623	-0.362369	-0.0398545	0.482419	0.0505774
27	r	6	wrs27rep4	0.28012	-0.0555676	0.243108	-0.0573364	0.167459	0.0682123	0.180437	-0.0215038	0.159829	-0.152015	0.0779252	0.0754549	-0.00241365	0.118602	0.0172436	0.0945015	-0.0506529	0.0424576	-0.00056823	0.00974962	-0.0686485	-0.044113	-0.0811428	-0.112827	-0.100541	-0.158746	-0.114191	0.106	-0.170046	0.0637785	-0.297383	0.00671476	-0.350989	0.00478483	-0.370375	-0.0411328	0.480829	0.0529851
27	r	7	wrs27rep3	0.278527	-0.0588127	0.239911	-0.0644442	0.169934	0.0729854	0.178275	-0.0230445	0.163415	-0.148274	0.0730639	0.0765822	-0.00506057	0.122257	0.0162539	0.091308	-0.043408	0.0422317	0.0026768	0.00877391	-0.0725812	-0.0401657	-0.0754338	-0.103967	-0.0983738	-0.154736	-0.113112	0.105284	-0.174126	0.0585163	-0.295342	0.00583671	-0.356422	0.00406618	-0.371078	-0.0449368	0.48288	0.05054
27	r	8	wrs27rep5	0.288678	-0.0605102	0.252335	-0.0609013	0.187035	0.0661763	0.184653	-0.0190668	0.158432	-0.146	0.0650128	0.0739989	-0.0111889	0.119885	0.00447189	0.0911441	-0.0525971	0.0387417	-0.00016209	0.00456031	-0.0706716	-0.0406445	-0.0846783	-0.103886	-0.107634	-0.149615	-0.121583	0.105703	-0.17505	0.0600233	-0.29	0.00501903	-0.345637	0.00375999	-0.362305	-0.0397362	0.480889	0.0513482
27	r	9	wrs27rep4	0.280469	-0.0585336	0.239754	-0.0597712	0.170361	0.0693166	0.181368	-0.0185562	0.162032	-0.14935	0.0769033	0.0754896	-0.00682334	0.121225	0.0176558	0.0909666	-0.0501551	0.042773	-0.000327272	0.00799717	-0.0701528	-0.0418254	-0.0811173	-0.110773	-0.0974631	-0.160706	-0.11333	0.108477	-0.169813	0.0627786	-0.299179	0.00816651	-0.351233	0.00443402	-0.369199	-0.0434819	0.480249	0.0513727
27	r	10	wrs27rep5	0.289034	-0.060562	0.249178	-0.0600199	0.187672	0.065979	0.185228	-0.0191104	0.158501	-0.147586	0.0658743	0.0738842	-0.0101556	0.119749	0.0041173	0.0932878	-0.0511016	0.0405722	0.00121267	0.00641017	-0.0714481	-0.0399958	-0.0836906	-0.103565	-0.107546	-0.152774	-0.120815	0.103889	-0.175561	0.0605749	-0.289012	0.00351836	-0.34634	0.00275736	-0.36435	-0.0384067	0.479202	0.0513971
28	r	1	wrs28rep1	0.28436	-0.063685	0.252899	-0.0641868	0.187041	0.0663336	0.178901	-0.0191169	0.15931	-0.141502	0.0650238	0.0766371	-0.0110671	0.120198	0.0100956	0.0909683	-0.0608866	0.0395737	-0.0103565	0.00933282	-0.0750784	-0.0375281	-0.0800533	-0.103182	-0.0965477	-0.148536	-0.112865	0.106959	-0.17816	0.056502	-0.2863	0.00366754	-0.347703	0.000576042	-0.365413	-0.0408919	0.486801	0.0478804
28	r	2	wrs28rep2	0.278943	-0.0578155	0.242316	-0.0570961	0.187936	0.0660848	0.182581	-0.0193669	0.163096	-0.144679	0.0670743	0.0793	-0.0102107	0.121853	0.00548527	0.0952934	-0.0429645	0.0373896	-0.00553469	0.00896877	-0.0679596	-0.0447189	-0.0785948	-0.107223	-0.104961	-0.154188	-0.107939	0.109082	-0.173021	0.0613568	-0.294413	0.00667492	-0.355773	0.00241669	-0.366068	-0.0472804	0.480009	0.0439477
28	r	3	wrs28rep1	0.284814	-0.0643021	0.253612	-0.0629483	0.18583	0.0663115	0.177529	-0.0192101	0.157992	-0.139882	0.0619097	0.0771344	-0.0102884	0.122092	0.0126436	0.0925033	-0.0605923	0.039676	-0.0103575	0.00751471	-0.0734275	-0.0395688	-0.0797417	-0.101388	-0.096625	-0.148558	-0.112211	0.109021	-0.177953	0.0568303	-0.288095	0.00442763	-0.348056	-0.000648801	-0.364349	-0.0442178	0.487365	0.0452134
28	r	4	wrs28rep3	0.283929	-0.0567655	0.242771	-0.0580336	0.190986	0.0673699	0.176004	-0.0189706	0.15368	-0.142935	0.0753264	0.0750582	-0.0050721	0.120499	0.015116	0.0905249	-0.0530019	0.0368674	-0.0102674	0.00807218	-0.0716148	-0.0394693	-0.0799156	-0.10108	-0.104384	-0.150237	-0.109547	0.109266	-0.175523	0.0570513	-0.292319	0.00173056	-0.352441	-0.00141724	-0.368343	-0.0448077	0.484616	0.0472772
28	r	5	wrs28rep2	0.278966	-0.0563109	0.2439	-0.0575642	0.186794	0.0678941	0.18265	-0.0194251	0.16072	-0.145846	0.0659543	0.0796855	-0.0107014	0.124165	0.00990271	0.0949116	-0.0439556	0.0382275	-0.00554441	0.00588637	-0.0676835	-0.0456934	-0.0805822	-0.109485	-0.10255	-0.151532	-0.110326	0.110265	-0.170066	0.0619368	-0.295212	0.00661229	-0.356747	0.00078102	-0.365089	-0.0472935	0.47957	0.0427854
28	r	6	wrs28rep4	0.281086	-0.0555513	0.245534	-0.0560337	0.191269	0.0666858	0.182894	-0.0208868	0.155368	-0.14489	0.0736082	0.0756102	-0.00921975	0.118827	0.0101063	0.0913545	-0.0484792	0.0390062	-0.013235	0.0111399	-0.0698417	-0.0397031	-0.0836045	-0.101705	-0.107192	-0.144627	-0.112074	0.106216	-0.179125	0.0567967	-0.293135	0.00134805	-0.348797	-0.00349258	-0.363199	-0.0441172	0.488037	0.0440212
28	r	7	wrs28rep3	0.281488	-0.0569162	0.242154	-0.0584871	0.190207	0.0650768	0.179419	-0.0182956	0.154833	-0.143564	0.0732192	0.0750305	-0.00705701	0.120524	0.0148682	0.0902012	-0.0546886	0.0388087	-0.0102359	0.00963867	-0.0715837	-0.0377909	-0.0788613	-0.103267	-0.104451	-0.148425	-0.108227	0.106928	-0.173502	0.0584126	-0.290609	0.00148502	-0.350682	-0.00159145	-0.372338	-0.0456613	0.486046	0.0478928
28	r	8	wrs28rep5	0.281606	-0.0595043	0.241751	-0.0580332	0.192666	0.0702238	0.177602	-0.0188559	0.159728	-0.143988	0.0684142	0.0807033	-0.0113891	0.125529	0.0102363	0.0954493	-0.058232	0.0441633	-0.00171724	0.00233214	-0.0656871	-0.0422527	-0.0844668	-0.103557	-0.10835	-0.147824	-0.107967	0.110613	-0.174412	0.0608898	-0.298443	0.00217037	-0.348178	-0.00237127	-0.358424	-0.0538431	0.485263	0.0381557
28	r	9	wrs28rep4	0.281147	-0.0587189	0.24619	-0.0557786	0.192179	0.0681644	0.182222	-0.0188754	0.154733	-0.144212	0.0729544	0.0753906	-0.010908	0.122043	0.0091885	0.0875191	-0.0451772	0.0382778	-0.0149915	0.0129965	-0.0732949	-0.0392467	-0.0834513	-0.101515	-0.107597	-0.149524	-0.109908	0.108865	-0.178621	0.0580247	-0.294118	0.00111165	-0.345871	-0.00252221	-0.362367	-0.0462597	0.487691	0.0442611
28	r	10	wrs28rep5	0.280082	-0.0590722	0.242011	-0.0578369	0.194457	0.0684127	0.178075	-0.0168747	0.15999	-0.14382	0.0686237	0.080892	-0.0129901	0.12594	0.0140142	0.0951714	-0.0582652	0.0425348	-0.00306607	0.00451574	-0.0657068	-0.0438961	-0.0840206	-0.101633	-0.112168	-0.150822	-0.10958	0.111006	-0.176027	0.0612632	-0.296488	0.00205497	-0.348019	-0.00226664	-0.356468	-0.0539776	0.485546	0.0384084
30	r	1	wrs30rep1	0.290253	-0.0609748	0.252262	-0.0614026	0.180096	0.0693634	0.178251	-0.0172377	0.160531	-0.142273	0.0632846	0.0773567	-0.0141689	0.123618	0.00854843	0.0927935	-0.0484733	0.0379337	-0.00765554	0.00739712	-0.0714013	-0.0414775	-0.0822056	-0.105639	-0.106165	-0.154237	-0.116638	0.108718	-0.169316	0.062529	-0.291548	0.0059087	-0.346145	0.00145204	-0.362773	-0.0459532	0.483263	0.0421249
30	r	2	wrs30rep2	0.283921	-0.0580485	0.249737	-0.0604121	0.18295	0.0686433	0.183464	-0.023838	0.154756	-0.145578	0.0665281	0.0742083	-0.00445421	0.120665	0.017141	0.0902871	-0.0538588	0.0386525	-0.0137513	0.00460436	-0.0748693	-0.0423249	-0.0791281	-0.106054	-0.102504	-0.152849	-0.109416	0.108145	-0.174268	0.0615761	-0.288982	0.00660776	-0.353427	0.00338764	-0.365408	-0.0426186	0.48157	0.0549465
30	r	3	wrs30rep1	0.288453	-0.0592312	0.251943	-0.0633731	0.180002	0.0692712	0.178095	-0.0173509	0.162078	-0.142558	0.0633176	0.0791425	-0.012481	0.123524	0.00842656	0.092827	-0.0486478	0.0379932	-0.00799309	0.00562592	-0.0698429	-0.0415739	-0.0824893	-0.105592	-0.104846	-0.156132	-0.117084	0.105254	-0.171299	0.062831	-0.293601	0.00628196	-0.344475	0.00335305	-0.362934	-0.0439008	0.483378	0.0436079
30	r	4	wrs30rep3	0.283043	-0.0621185	0.246708	-0.0615438	0.190468	0.0644447	0.182105	-0.0199598	0.161995	-0.148756	0.0676806	0.0771299	-0.00660605	0.12218	0.0117662	0.0903644	-0.0571706	0.0419576	-0.010239	0.0131023	-0.0694234	-0.0406781	-0.0785591	-0.104087	-0.105505	-0.150949	-0.11689	0.106657	-0.176424	0.0624185	-0.290961	0.00660105	-0.348011	-0.00123033	-0.363575	-0.0457629	0.479597	0.0502303
30	r	5	wrs30rep2	0.285465	-0.0597426	0.25148	-0.0602288	0.179165	0.0693099	0.181521	-0.0232978	0.160267	-0.145682	0.0665468	0.0745411	-0.00438301	0.120989	0.0207455	0.0883952	-0.0558263	0.0373507	-0.0172572	0.00722644	-0.0727509	-0.040201	-0.079252	-0.107445	-0.102446	-0.15234	-0.109287	0.108503	-0.174113	0.0619782	-0.290822	0.00538499	-0.353001	0.0057366	-0.365348	-0.0439736	0.479294	0.0534961
30	r	6	wrs30rep4	0.282697	-0.0550972	0.2477	-0.0587835	0.179057	0.0673154	0.178366	-0.0166091	0.154103	-0.150062	0.065717	0.0748417	-0.00237754	0.124446	0.0223673	0.0897427	-0.0507551	0.0408715	-0.00989976	0.011107	-0.0718794	-0.0396294	-0.0775109	-0.107445	-0.10171	-0.160689	-0.113876	0.108744	-0.179256	0.0604871	-0.29141	0.00669246	-0.350869	0.00519158	-0.36361	-0.048061	0.483147	0.0469368
30	r	7	wrs30rep3	0.284636	-0.060787	0.244619	-0.0622517	0.188423	0.0654482	0.183939	-0.0205842	0.160028	-0.149308	0.0678109	0.0762988	-0.00825317	0.12122	0.00987487	0.0951675	-0.0531036	0.0432499	-0.00999392	0.0123882	-0.0691617	-0.0393895	-0.0801293	-0.104669	-0.10683	-0.157167	-0.11455	0.10588	-0.173996	0.0617234	-0.288358	0.0060163	-0.351172	0.00180886	-0.362768	-0.04632	0.478987	0.0512759
30	r	8	wrs30rep5	0.280418	-0.0559062	0.252995	-0.0616843	0.175755	0.0681827	0.173251	-0.0194919	0.166788	-0.155153	0.0721963	0.075732	-0.0118815	0.124416	0.013382	0.0912306	-0.0526314	0.042503	-0.00391492	0.00463463	-0.074257	-0.0376017	-0.0839798	-0.105074	-0.104895	-0.153427	-0.111102	0.106711	-0.172426	0.0626747	-0.292918	0.00419204	-0.344153	0.00129083	-0.366145	-0.0430953	0.483519	0.0498659
30	r	9	wrs30rep4	0.28245	-0.0568476	0.246174	-0.056487	0.177523	0.0698052	0.178327	-0.0163922	0.157362	-0.152476	0.0659095	0.0770953	-0.00317668	0.121223	0.0218902	0.0883219	-0.0510363	0.041294	-0.0126333	0.00806366	-0.0722339	-0.0392917	-0.0741948	-0.107811	-0.100314	-0.160792	-0.114193	0.109285	-0.177822	0.0606967	-0.292003	0.00721575	-0.349988	0.00357646	-0.365556	-0.0435306	0.483514	0.0470505
30	r	10	wrs30rep5	0.279229	-0.0554897	0.253988	-0.0598291	0.178203	0.0677719	0.176085	-0.0180454	0.167862	-0.153263	0.0671406	0.074923	-0.0114906	0.122475	0.0119642	0.0896763	-0.0525505	0.0388002	-0.00638089	0.00709489	-0.0716191	-0.0380139	-0.0849219	-0.104727	-0.10617	-0.154858	-0.113528	0.109077	-0.173717	0.0610876	-0.293397	0.0062137	-0.344598	0.00330023	-0.361517	-0.043944	0.485417	0.0477497
31	r	1	wrs31rep1	0.283099	-0.0597712	0.239306	-0.0622894	0.18702	0.0654354	0.17595	-0.0186117	0.156092	-0.148696	0.0755574	0.0778132	-0.00183301	0.125257	0.0214899	0.0930957	-0.0525488	0.0391312	-0.0139878	0.0117206	-0.0702859	-0.0414214	-0.0793961	-0.10428	-0.103854	-0.150922	-0.11045	0.110659	-0.182412	0.0569145	-0.293102	0.0022317	-0.351205	-0.00389291	-0.362722	-0.043927	0.483281	0.0515534
31	r	2	wrs31rep2	0.280329	-0.0576205	0.247957	-0.0579162	0.188137	0.0617226	0.18557	-0.0183759	0.150424	-0.152767	0.0705649	0.074399	-0.00980897	0.123369	0.017566	0.0898153	-0.044748	0.0429779	-0.00679314	0.0123827	-0.0765348	-0.0360955	-0.0837049	-0.0981863	-0.110182	-0.147702	-0.11024	0.109274	-0.184108	0.0583251	-0.286901	0.00410028	-0.352137	-0.00408411	-0.360286	-0.0532884	0.484896	0.0496708
31	r	3	wrs31rep3	0.28185	-0.0596601	0.243186	-0.0618851	0.191229	0.0655288	0.167278	-0.00738835	0.156056	-0.144849	0.0720563	0.0758372	-0.00598553	0.122912	0.01466	0.0935033	-0.0497139	0.0414393	-0.0107329	0.0145091	-0.0704159	-0.0416766	-0.0820416	-0.103896	-0.111092	-0.150306	-0.11668	0.106678	-0.17354	0.0592642	-0.291568	-0.000937056	-0.347178	-0.00295179	-0.360634	-0.0488784	0.493267	0.0427573
31	r	4	wrs31rep4	0.280647	-0.0586277	0.246295	-0.0600381	0.200328	0.06134	0.175706	-0.0151984	0.158579	-0.150534	0.0761797	0.0729206	-0.0133174	0.122846	0.0112774	0.0898666	-0.0538296	0.0419628	-0.00217936	0.00779138	-0.0668685	-0.0366762	-0.0778141	-0.0981307	-0.103403	-0.148039	-0.125766	0.10441	-0.179712	0.0565488	-0.301064	0.00500664	-0.351294	-0.000754337	-0.355016	-0.0428582	0.481252	0.0481641
31	r	5	wrs31rep5	0.286553	-0.0621781	0.249072	-0.061435	0.177431	0.069042	0.182648	-0.0215444	0.161831	-0.146522	0.0708376	0.0731826	-0.0120632	0.123894	0.0125534	0.0930542	-0.0535173	0.0423888	-0.000204706	0.00794508	-0.0686913	-0.0402696	-0.0778746	-0.10155	-0.101563	-0.148126	-0.119297	0.105157	-0.178526	0.0583392	-0.293314	0.00313852	-0.350778	0.000610618	-0.364696	-0.0411644	0.4796	0.0460378
31	r	6	wrs02rep3	0.285733	-0.0600252	0.249519	-0.0585032	0.183161	0.0701864	0.18305	-0.0162903	0.161447	-0.152259	0.0711905	0.0773485	-0.00599103	0.12364	0.0146665	0.092571	-0.0478564	0.0398028	-0.0127766	0.013517	-0.0693879	-0.0385186	-0.0824011	-0.103176	-0.108707	-0.157466	-0.124635	0.107158	-0.180501	0.0588156	-0.286634	0.00905323	-0.341706	0.00284008	-0.356544	-0.0422289	0.484694	0.0498553
32	r	1	wrs32rep1	0.285229	-0.0624299	0.243329	-0.0619779	0.1854	0.0702911	0.175551	-0.012252	0.156575	-0.146416	0.0665758	0.0816229	-0.00425993	0.122664	0.0154542	0.0943288	-0.0432408	0.0405927	-0.00717067	0.0117689	-0.0745521	-0.0389135	-0.0821257	-0.105355	-0.107605	-0.15649	-0.117428	0.109475	-0.183272	0.0567523	-0.287453	0.00397144	-0.346466	-0.000454033	-0.360706	-0.0495297	0.486165	0.0423519
32	r	2	wrs32rep2	0.281826	-0.054735	0.242754	-0.0613077	0.18257	0.0695719	0.171275	-0.0149637	0.158329	-0.146778	0.0667793	0.0788945	-0.00470467	0.12524	0.0136997	0.0939698	-0.0526645	0.0393385	-0.0122208	0.00924821	-0.0671665	-0.0411872	-0.0784475	-0.109293	-0.10173	-0.154151	-0.110705	0.107909	-0.168848	0.0614823	-0.295918	0.00269861	-0.352818	-5.45394e-05	-0.361678	-0.0465268	0.489668	0.040644
32	r	3	wrs32rep3	0.275925	-0.0588491	0.241147	-0.0593805	0.177721	0.0687876	0.174014	-0.0131371	0.156191	-0.150451	0.0725445	0.0782372	-0.00530523	0.127272	0.0191218	0.0940046	-0.0459296	0.0413581	-0.0122641	0.00908733	-0.0720415	-0.0458578	-0.0826937	-0.103399	-0.101929	-0.154678	-0.110781	0.112986	-0.166606	0.06134	-0.29823	5.44023e-05	-0.351467	-0.00247508	-0.361145	-0.0491312	0.491727	0.0442318
32	r	4	wrs32rep4	0.284363	-0.0609132	0.246123	-0.0611928	0.185271	0.0671184	0.170574	-0.0145787	0.156483	-0.145476	0.06688	0.0795106	-0.0033196	0.125402	0.0109211	0.0961843	-0.0526869	0.0429448	-0.0134369	0.0103412	-0.0760772	-0.0357554	-0.0819414	-0.10591	-0.0983793	-0.160078	-0.112835	0.109306	-0.179526	0.0601231	-0.291039	0.00245346	-0.347871	-0.00076651	-0.354407	-0.049001	0.490903	0.0402877
32	r	5	wrs32rep5	0.279853	-0.0542238	0.242816	-0.0562227	0.196502	0.0645328	0.170217	-0.0146897	0.163267	-0.1453	0.0715465	0.0722091	-0.0071002	0.120404	0.0146153	0.0905459	-0.0379354	0.0274172	-0.017666	0.00882149	-0.0766463	-0.0402507	-0.0889401	-0.103851	-0.112641	-0.150586	-0.108998	0.105287	-0.173262	0.0572404	-0.303108	0.00171408	-0.351783	-0.00353467	-0.351968	-0.0328526	0.491232	0.0533398
32	r	6	wrs32rep1	0.287974	-0.0624545	0.242463	-0.0615688	0.182489	0.0709543	0.177635	-0.0159952	0.15732	-0.148248	0.0653498	0.0818534	-0.0051033	0.12639	0.0180003	0.0957756	-0.0444808	0.0406169	-0.00858864	0.0100401	-0.0736477	-0.0374582	-0.08291	-0.10371	-0.108326	-0.154924	-0.118833	0.10943	-0.180811	0.0578526	-0.288813	0.00357678	-0.346073	-0.00119697	-0.358704	-0.0523714	0.485059	0.0414374
32	r	7	wrs32rep2	0.281425	-0.0561374	0.242873	-0.059125	0.180572	0.067937	0.169772	-0.0127687	0.154761	-0.147602	0.0671067	0.0787449	-0.00779839	0.125304	0.0143696	0.0955343	-0.0535584	0.0412145	-0.0100167	0.00724731	-0.0699577	-0.0406845	-0.0775629	-0.109	-0.101345	-0.159135	-0.109485	0.11114	-0.16583	0.0628088	-0.294283	0.00430391	-0.351415	-0.00207626	-0.362013	-0.0482201	0.492385	0.0405152
32	r	8	wrs32rep3	0.277323	-0.0565616	0.242425	-0.0589704	0.176849	0.0672812	0.175117	-0.0147194	0.156089	-0.148137	0.0701204	0.078485	-0.00427742	0.125185	0.0203473	0.0938124	-0.042719	0.0409383	-0.012809	0.00727643	-0.0716172	-0.0386727	-0.0811309	-0.105382	-0.103706	-0.154514	-0.111578	0.109058	-0.166762	0.0627915	-0.297963	0.00312731	-0.353265	-0.00296488	-0.363001	-0.0513988	0.490558	0.043364
32	r	9	wrs32rep4	0.283201	-0.0590246	0.246235	-0.0630481	0.18227	0.067722	0.172522	-0.0165114	0.15842	-0.145664	0.0620556	0.0805915	-0.00476742	0.124364	0.0150282	0.0961537	-0.0525309	0.041713	-0.0148634	0.0110486	-0.0740523	-0.035443	-0.0800535	-0.105622	-0.101715	-0.157266	-0.114124	0.110254	-0.179403	0.0591418	-0.290594	0.00522638	-0.346166	-0.0017039	-0.354828	-0.0514914	0.493367	0.0395593
32	r	10	wrs32rep5	0.278428	-0.0521225	0.241429	-0.0541436	0.196508	0.0643578	0.171721	-0.0169049	0.16134	-0.14671	0.0741124	0.0751298	-0.0065906	0.121802	0.0144445	0.0884625	-0.0387531	0.0309883	-0.0188368	0.0106642	-0.0780644	-0.0401602	-0.0864403	-0.102621	-0.111106	-0.154613	-0.111156	0.101685	-0.174647	0.0571694	-0.302226	0.00303694	-0.349085	-0.00257859	-0.353453	-0.0347099	0.492374	0.0512681
33	r	1	wrs33rep1	0.283923	-0.0610718	0.237943	-0.0610793	0.185986	0.0660665	0.179021	-0.0164272	0.16097	-0.146302	0.0742556	0.077875	-0.00486403	0.123333	0.0105682	0.0951272	-0.0575913	0.0463408	-0.00389195	0.00925492	-0.0721241	-0.0413665	-0.0820307	-0.105349	-0.104208	-0.154128	-0.114018	0.10745	-0.169105	0.0636601	-0.29845	0.00259904	-0.350018	0.000974191	-0.359486	-0.0519876	0.483121	0.0450306
33	r	2	wrs33rep2	0.285142	-0.0590315	0.246806	-0.0609433	0.191748	0.0649103	0.18098	-0.0172737	0.163022	-0.150593	0.0803479	0.0774387	-0.00921259	0.122881	0.0127701	0.090068	-0.0565	0.0424414	-0.00712866	0.00786395	-0.0727563	-0.0361033	-0.0817371	-0.101851	-0.109007	-0.153032	-0.120549	0.108025	-0.178866	0.0604239	-0.293771	0.00721713	-0.346702	-0.000204009	-0.359371	-0.0495271	0.474784	0.0472894
33	r	3	wrs33rep3	0.28221	-0.0621237	0.246476	-0.0608016	0.191026	0.0669227	0.18392	-0.0224123	0.154503	-0.147945	0.0820273	0.0789321	-0.0104458	0.126684	0.0159185	0.095429	-0.0568625	0.0471535	-0.00950024	0.00876496	-0.0733524	-0.0417364	-0.0853819	-0.105171	-0.114837	-0.154765	-0.115409	0.109218	-0.178367	0.062289	-0.297603	0.00282926	-0.341831	0.000574502	-0.351635	-0.0539188	0.479144	0.0500768
33	r	4	wrs33rep4	0.285048	-0.0615138	0.249606	-0.0631827	0.193497	0.0632811	0.18007	-0.0169516	0.156089	-0.146635	0.0788362	0.0711328	-0.0115125	0.123652	0.00793746	0.0936487	-0.0560971	0.0445297	-0.00977977	0.0106394	-0.0752025	-0.0363363	-0.0820851	-0.103191	-0.105003	-0.150006	-0.120099	0.108048	-0.172031	0.0637317	-0.294326	0.00119733	-0.34856	-0.00200146	-0.356596	-0.0482986	0.480209	0.0482555
33	r	5	wrs33rep5	0.281812	-0.0653785	0.239086	-0.0656298	0.186868	0.0656392	0.190691	8.58918e-06	0.15592	-0.151903	0.0704204	0.0796155	-0.0107753	0.126658	0.00995334	0.0953364	-0.054814	0.0412469	0.00441481	0.007172	-0.0651559	-0.0423997	-0.0814748	-0.106483	-0.1023	-0.153106	-0.117632	0.109332	-0.179379	0.0621579	-0.302531	0.0030202	-0.345581	0.000962136	-0.357679	-0.0489768	0.478157	0.0427275
33	r	6	wrs33rep1	0.283766	-0.0625813	0.239674	-0.0627021	0.182304	0.0681279	0.179018	-0.0162518	0.161036	-0.147823	0.076052	0.0759387	-0.00837443	0.125152	0.0142578	0.0930406	-0.0573011	0.0480595	-0.00553668	0.00930432	-0.0698318	-0.0377951	-0.0833355	-0.101569	-0.103823	-0.155883	-0.111955	0.10714	-0.170605	0.0634941	-0.297908	0.00231541	-0.351247	0.000716501	-0.358894	-0.0540964	0.482704	0.0454123
33	r	7	wrs33rep2	0.284967	-0.061444	0.246635	-0.0615146	0.193465	0.0643401	0.182662	-0.0159987	0.162831	-0.151111	0.0802676	0.0769089	-0.0129069	0.124198	0.0145282	0.0932165	-0.0565684	0.0438006	-0.00903706	0.00373273	-0.0728516	-0.036546	-0.0836861	-0.100455	-0.109148	-0.151611	-0.120574	0.107573	-0.177078	0.0618342	-0.295624	0.00503022	-0.344902	-0.000535713	-0.357589	-0.0498431	0.474609	0.0484251
33	r	8	wrs33rep3	0.28225	-0.0599755	0.246191	-0.0604248	0.187412	0.06778	0.185637	-0.0225875	0.155832	-0.149469	0.0836755	0.0766731	-0.00980578	0.126521	0.0164598	0.095361	-0.054314	0.0468278	-0.0111276	0.00766173	-0.0747829	-0.0426483	-0.0841253	-0.102752	-0.116612	-0.157064	-0.116202	0.109594	-0.176297	0.0659577	-0.297822	0.00362424	-0.342348	-0.000387424	-0.352138	-0.0546944	0.478118	0.0500022
33	r	9	wrs33rep4	0.285107	-0.061457	0.248283	-0.0609802	0.19396	0.0650908	0.180151	-0.0168924	0.157173	-0.150459	0.0775546	0.0733285	-0.0117639	0.121941	0.00944542	0.0915633	-0.0559711	0.0446008	-0.0118068	0.0093234	-0.0715503	-0.0370038	-0.0829798	-0.0991858	-0.105264	-0.151663	-0.119956	0.108114	-0.174026	0.0624218	-0.293787	0.00306238	-0.348012	-0.000130858	-0.356805	-0.04995	0.480246	0.0482763
33	r	10	wrs33rep5	0.281876	-0.0602391	0.239106	-0.062581	0.182975	0.0699457	0.192526	-0.0311243	0.159102	-0.14743	0.0721968	0.0803727	-0.010945	0.125075	0.0101713	0.0958714	-0.0550667	0.0455216	0.00168942	0.00875077	-0.0668501	-0.0392245	-0.0805481	-0.101546	-0.101794	-0.153433	-0.118863	0.107394	-0.179928	0.0600608	-0.303471	0.00249065	-0.345968	0.00194132	-0.355853	-0.0480843	0.479645	0.0462384
34	r	1	wrs34rep1	0.278705	-0.0635884	0.24296	-0.0634039	0.183993	0.0673498	0.179913	-0.0206717	0.167797	-0.147338	0.0779868	0.0790621	-0.00923125	0.124466	0.0174398	0.0932828	-0.0500945	0.0442724	-0.00482511	0.0110343	-0.0702945	-0.0363216	-0.0818218	-0.106578	-0.101839	-0.151428	-0.12224	0.106836	-0.178002	0.0621714	-0.293675	0.00342189	-0.352352	0.000493201	-0.361621	-0.0493068	0.4772	0.0462461
34	r	2	wrs34rep2	0.278531	-0.0620791	0.243252	-0.0621487	0.184536	0.0732237	0.184903	-0.019641	0.156073	-0.145086	0.0725769	0.0813966	1.60547e-05	0.127976	0.0229603	0.0965563	-0.0518778	0.0451122	-0.00537569	0.0100207	-0.0799307	-0.0396106	-0.0849497	-0.107508	-0.107642	-0.157801	-0.108647	0.10965	-0.177483	0.0609835	-0.288744	0.00222249	-0.352895	-0.00448036	-0.362337	-0.0531261	0.477032	0.0443383
34	r	3	wrs34rep3	0.288061	-0.0633378	0.251276	-0.0620273	0.187739	0.0686029	0.174564	-0.0146212	0.156284	-0.148898	0.065177	0.0778953	-0.011539	0.125303	0.0101596	0.0946258	-0.0526775	0.0403421	-0.00895682	0.00851517	-0.0708057	-0.0385118	-0.0794518	-0.102023	-0.107069	-0.155556	-0.117356	0.108289	-0.174255	0.0568939	-0.288395	0.0058945	-0.350003	0.00134439	-0.356675	-0.0476484	0.483923	0.0449174
34	r	4	wrs34rep4	0.275006	-0.0603455	0.242978	-0.0610873	0.185447	0.0665232	0.188194	-0.023965	0.169502	-0.142519	0.066199	0.07776	-0.0119227	0.126477	0.0149019	0.0919939	-0.0518535	0.0418894	-0.00976759	0.00972581	-0.0727978	-0.0407283	-0.0828451	-0.107455	-0.107731	-0.152108	-0.109063	0.113072	-0.16668	0.0602298	-0.294111	0.00456409	-0.352749	0.000690707	-0.363256	-0.050952	0.480549	0.0462337
34	r	5	wrs34rep5	0.286481	-0.0626388	0.250609	-0.064304	0.182109	0.0634892	0.164629	-0.00972027	0.160554	-0.148259	0.0763296	0.0751902	-0.00450912	0.125455	0.0163293	0.0930975	-0.0382922	0.0409131	-0.00383986	0.0126796	-0.0730853	-0.0360075	-0.0800682	-0.0991009	-0.10252	-0.149209	-0.120568	0.111999	-0.174979	0.0616724	-0.288763	0.00101016	-0.359048	-0.00623505	-0.367896	-0.0522157	0.476529	0.0421844
34	r	6	wrs34rep1	0.278735	-0.0621484	0.244846	-0.0621174	0.184009	0.0670836	0.178144	-0.0188699	0.165625	-0.147384	0.0778063	0.0770998	-0.0087231	0.128216	0.0172774	0.0914137	-0.0503358	0.0425038	-0.00118853	0.0106368	-0.0741698	-0.0357887	-0.0800203	-0.104797	-0.10259	-0.154988	-0.122182	0.10704	-0.176364	0.0603909	-0.293576	0.00574079	-0.35247	0.00104267	-0.362024	-0.0506051	0.477201	0.0455305
34	r	7	wrs34rep2	0.278546	-0.0644374	0.243252	-0.0644587	0.185268	0.0746705	0.181315	-0.0212842	0.156494	-0.143688	0.0732735	0.0830004	0.00227207	0.127603	0.0215608	0.0967078	-0.0512808	0.0468721	-0.00385229	0.00598473	-0.0794604	-0.0378461	-0.0866713	-0.10729	-0.10582	-0.158142	-0.108271	0.109703	-0.177486	0.0593002	-0.288587	0.0024793	-0.354299	-0.00204219	-0.362571	-0.0546015	0.476317	0.0474695
34	r	8	wrs34rep3	0.288319	-0.0627312	0.249733	-0.0611176	0.189532	0.065444	0.174176	-0.0193014	0.15983	-0.150387	0.0638901	0.0790384	-0.0111718	0.124482	0.0122893	0.0935322	-0.0524226	0.0396051	-0.00851125	0.00953619	-0.0724742	-0.0389508	-0.0796471	-0.104494	-0.10296	-0.153032	-0.116484	0.111254	-0.179132	0.0588915	-0.289689	0.0075744	-0.349723	0.00105285	-0.356464	-0.0479167	0.480909	0.04752
34	r	9	wrs34rep4	0.276497	-0.0596001	0.24062	-0.0617415	0.183747	0.0676932	0.189753	-0.0248767	0.170737	-0.143183	0.0701211	0.0768684	-0.0112644	0.127961	0.0150517	0.0897359	-0.0513838	0.0436306	-0.0115024	0.00971494	-0.0706835	-0.0389709	-0.0848128	-0.107056	-0.106256	-0.153782	-0.108469	0.11301	-0.170048	0.0589299	-0.293541	0.00523405	-0.352095	0.00154277	-0.36478	-0.0516622	0.478309	0.0465511
34	r	10	wrs34rep5	0.283794	-0.0624862	0.249815	-0.0643564	0.179739	0.0653422	0.165575	-0.0118959	0.163573	-0.148629	0.0757289	0.0749669	-0.00851957	0.127431	0.0174436	0.0907932	-0.0401993	0.0446313	-0.0029023	0.00861553	-0.0716559	-0.0363156	-0.0806836	-0.100983	-0.101254	-0.15124	-0.119094	0.111517	-0.173438	0.0612448	-0.288528	0.00455406	-0.358939	-0.00453964	-0.367978	-0.0523195	0.45041	0.0291149

## Sheet: Centroid size
Hive number	Wing side	Replicate bee	ID	Centroid Size	Log Centroid Size
1	l	1	1_l_1	5.55016	1.71383
1	l	2	1_l_2	5.33136	1.67361
1	l	3	1_l_3	5.50679	1.70598
1	l	4	1_l_4	5.34408	1.67599
1	l	5	1_l_5	5.45601	1.69672
1	l	6	1_l_6	5.32795	1.67297
1	l	7	1_l_7	5.51736	1.7079
1	l	8	1_l_8	5.34353	1.67589
1	l	9	1_l_9	5.42216	1.69036
1	l	10	1_l_10	5.4331	1.69235
3	l	1	3_l_1	5.45229	1.69604
3	l	2	3_l_2	5.3623	1.67939
3	l	3	3_l_3	5.4962	1.70406
3	l	4	3_l_4	5.56382	1.71629
3	l	5	3_l_5	5.44986	1.69559
3	l	6	3_l_6	5.36368	1.67965
3	l	7	3_l_7	5.49649	1.70411
3	l	8	3_l_8	5.55886	1.71539
3	l	9	3_l_9	1083.42	6.98788
3	l	10	3_l_10	5.46794	1.69881
7	l	1	7_l_1	1079.92	6.98465
7	l	2	7_l_2	1069.52	6.97497
7	l	3	7_l_3	1072.26	6.97752
7	l	4	7_l_4	1078	6.98286
7	l	5	7_l_5	6.87095	1.9273
7	l	6	7_l_6	6.79119	1.91563
7	l	7	7_l_7	6.82093	1.92
7	l	8	7_l_8	6.85943	1.92562
7	l	9	7_l_9	6.91069	1.93307
7	l	10	7_l_10	6.85064	1.92432
9	l	1	9_l_1	1061.72	6.96765
9	l	2	9_l_2	1048.53	6.95514
9	l	3	9_l_3	1055.59	6.96185
9	l	4	9_l_4	1078.98	6.98377
9	l	5	9_l_5	1069.74	6.97517
9	l	6	9_l_6	6.70379	1.90267
9	l	7	9_l_7	6.67587	1.8985
9	l	8	9_l_8	6.71111	1.90376
9	l	9	9_l_9	6.7415	1.90828
9	l	10	9_l_10	6.78526	1.91475
10	l	1	10_l_1	5.62212	1.72671
10	l	2	10_l_2	5.56244	1.71604
10	l	3	10_l_3	5.49405	1.70367
10	l	4	10_l_4	5.47085	1.69943
10	l	5	10_l_5	5.3977	1.68597
10	l	6	10_l_6	5.63493	1.72899
10	l	7	10_l_7	5.56227	1.71601
10	l	8	10_l_8	5.51822	1.70805
10	l	9	10_l_9	5.44862	1.69536
10	l	10	10_l_10	5.38881	1.68432
11	l	1	11_l_1	5.53013	1.71021
11	l	2	11_l_2	5.40095	1.68658
11	l	3	11_l_3	5.31803	1.6711
11	l	4	11_l_4	5.33381	1.67407
11	l	5	11_l_5	5.42209	1.69048
11	l	6	11_l_6	5.51447	1.70738
11	l	7	11_l_7	5.39239	1.68499
11	l	8	11_l_8	5.32188	1.67183
11	l	9	11_l_9	5.32934	1.67323
11	l	10	11_l_10	5.43041	1.69201
13	l	1	13_l_1	5.53162	1.71048
13	l	2	13_l_2	5.43927	1.69365
13	l	3	13_l_3	5.34845	1.67681
13	l	4	13_l_4	5.39781	1.68599
13	l	5	13_l_5	5.56296	1.71613
13	l	6	13_l_6	5.53179	1.71051
13	l	7	13_l_7	5.39638	1.68573
13	L	8	13_L_8	5.57522	1.71833
13	l	9	13_l_9	5.33474	1.67424
13	l	10	13_l_10	5.39227	1.68497
16	l	1	16_l_1	5.51535	1.70754
16	l	2	16_l_2	5.64446	1.73067
16	l	3	16_l_3	5.49848	1.70447
16	l	4	16_l_4	5.37179	1.68116
16	l	5	16_l_5	5.54903	1.71362
16	l	6	16_l_6	5.4943	1.70371
16	l	7	16_l_7	5.64256	1.73034
16	l	8	16_l_8	5.49336	1.70354
16	l	9	16_l_9	5.37864	1.68244
16	l	10	16_l_10	5.54977	1.71376
17	l	1	17_l_1	5.38039	1.68276
17	l	2	17_l_2	5.28975	1.66577
17	l	3	17_l_3	5.09856	1.62896
17	l	4	17_l_4	5.52444	1.70918
17	l	5	17_l_5	5.57616	1.7185
17	l	6	17_l_6	5.37627	1.682
17	l	7	17_l_7	5.30073	1.66784
17	l	8	17_l_8	5.09665	1.62858
17	l	9	17_l_9	5.46807	1.69893
17	l	10	17_l_10	5.55068	1.71392
18	l	1	18_l_1	5.54763	1.71337
18	l	2	18_l_2	5.52224	1.70878
18	l	3	18_l_3	5.49092	1.7031
18	l	4	18_l_4	5.29476	1.66672
18	l	5	18_l_5	5.5507	1.71392
18	l	6	18_l_6	5.59543	1.72195
18	l	7	18_l_7	5.54596	1.71307
18	l	8	18_l_8	5.49421	1.70369
18	l	9	18_l_9	5.28833	1.6655
18	l	10	18_l_10	5.54422	1.71276
19	l	1	19_l_1	5.57678	1.71861
19	l	2	19_l_2	5.49858	1.70449
19	l	3	19_l_3	5.70032	1.74052
19	l	4	19_l_4	5.47763	1.70067
19	l	5	19_l_5	5.59912	1.72261
19	l	6	19_l_6	5.5728	1.7179
19	l	7	19_l_7	5.50486	1.70563
19	l	8	19_l_8	5.69832	1.74017
19	l	9	19_l_9	5.47875	1.70088
19	l	10	19_l_10	5.59368	1.72164
21	l	1	21_l_1	5.3692	1.68068
21	l	2	21_l_2	5.44294	1.69432
21	l	3	21_l_3	5.58154	1.71946
21	l	4	21_l_4	5.53781	1.7116
21	l	5	21_l_5	5.4156	1.68928
21	l	6	21_l_6	5.39364	1.68522
21	l	7	21_l_7	5.41392	1.68897
21	l	8	21_l_8	5.58275	1.71968
21	l	9	21_l_9	5.54078	1.71213
21	l	10	21_l_10	5.39989	1.68638
22	l	1	22_l_1	1047.93	6.95457
22	l	2	22_l_2	1019.63	6.9272
22	l	3	22_l_3	1012.55	6.92023
22	l	4	22_l_4	1026.38	6.9338
22	l	5	22_l_5	1019.97	6.92753
22	l	6	22_l_6	6.62762	1.89125
22	l	7	22_l_7	6.43533	1.8618
22	l	8	22_l_8	6.39204	1.85505
22	l	9	22_l_9	6.4606	1.86572
22	l	10	22_l_10	6.48208	1.86904
23	l	1	23_l_1	7.19565	1.97348
23	l	2	23_l_2	5.41435	1.68905
23	l	3	23_l_3	5.50481	1.70562
23	l	4	23_l_4	5.35821	1.67863
23	l	5	23_l_5	7.22074	1.97696
23	l	6	23_l_6	5.40901	1.68807
23	l	7	23_l_7	5.55403	1.71452
23	l	8	23_l_8	5.41468	1.68911
23	l	9	23_l_9	5.88394	1.76443
23	l	10	23_l_10	5.42579	1.6911
24	l	1	24_l_1	1051.9	6.95835
24	l	2	24_l_2	1071.07	6.97641
24	l	3	24_l_3	1048.07	6.9547
24	l	4	24_l_4	1050.39	6.95692
24	l	5	24_l_5	1081.98	6.98655
24	l	6	24_l_6	6.64692	1.89415
24	l	7	24_l_7	6.75853	1.91081
24	l	8	24_l_8	6.60706	1.88814
24	l	9	24_l_9	6.57772	1.88369
24	l	10	24_l_10	6.76387	1.91159
26	l	1	26_l_1	5.36073	1.6791
26	l	2	26_l_2	5.42155	1.69038
26	l	3	26_l_3	5.21885	1.65228
26	l	4	26_l_4	5.41844	1.68981
26	l	5	26_l_5	5.33239	1.6738
26	l	6	26_l_6	5.39167	1.68486
26	l	7	26_l_7	5.4639	1.69816
26	l	8	26_l_8	5.23679	1.65571
26	l	9	26_l_9	5.41879	1.68987
26	l	10	26_l_10	5.29089	1.66599
27	l	1	27_l_1	5.52102	1.70856
27	l	2	27_l_2	5.44449	1.6946
27	l	3	27_l_3	5.37135	1.68108
27	l	4	27_l_4	5.48245	1.70155
27	l	5	27_l_5	5.48788	1.70254
27	l	6	27_l_6	5.5105	1.70666
27	l	7	27_l_7	5.44122	1.694
27	l	8	27_l_8	5.36134	1.67921
27	l	9	27_l_9	5.51703	1.70784
27	l	10	27_l_10	5.48045	1.70119
28	l	1	28_l_1	5.49026	1.70298
28	l	2	28_l_2	5.60888	1.72435
28	l	3	28_l_3	5.56781	1.717
28	l	4	28_l_4	5.72996	1.74571
28	l	5	28_l_5	5.62779	1.72772
28	l	6	28_l_6	5.49038	1.703
28	l	7	28_l_7	5.58714	1.72047
28	l	8	28_l_8	5.57438	1.71818
28	l	9	28_l_9	5.74881	1.74899
28	l	10	28_l_10	5.58642	1.72034
30	l	1	30_l_1	5.63022	1.72815
30	l	2	30_l_2	5.29539	1.66684
30	l	3	30_l_3	5.28761	1.66537
30	l	4	30_l_4	5.36425	1.67976
30	l	5	30_l_5	5.49104	1.70312
30	l	6	30_l_6	5.63566	1.72912
30	l	7	30_l_7	5.31681	1.67087
30	l	8	30_l_8	5.29669	1.66708
30	l	9	30_l_9	5.35837	1.67866
30	l	10	30_l_10	5.48511	1.70204
31	l	1	31_l_1	1092.59	6.9963
31	l	2	31_l_2	1045	6.95177
31	l	3	31_l_3	1062.08	6.96799
31	l	4	31_l_4	1022.71	6.93021
31	l	5	31_l_5	1040.99	6.94792
31	l	6	31_l_6	1052.67	6.95884
31	l	7	31_l_7	1052.67	6.95884
31	l	8	31_l_8	1053.54	6.95988
31	l	9	31_l_9	1077.33	6.98215
31	l	10	31_l_10	1031.85	6.93907
32	l	1	32_l_1	5.61961	1.72626
32	l	2	32_l_2	5.62392	1.72703
32	l	3	32_l_3	5.60942	1.72445
32	l	4	32_l_4	5.62509	1.72724
32	l	5	32_l_5	5.52526	1.70933
32	l	6	32_l_6	5.59211	1.72136
32	l	7	32_l_7	5.61216	1.72494
32	l	8	32_l_8	5.58215	1.71957
32	l	9	32_l_9	5.63958	1.72981
32	l	10	32_l_10	5.55085	1.71395
33	l	1	33_l_1	5.45991	1.69743
33	l	2	33_l_2	5.53415	1.71094
33	l	3	33_l_3	5.55934	1.71548
33	l	4	33_l_4	5.53198	1.71055
33	l	5	33_l_5	5.51516	1.7075
33	l	6	33_l_6	5.45848	1.69717
33	l	7	33_l_7	5.53094	1.71036
33	l	8	33_l_8	5.52037	1.70844
33	l	9	33_l_9	5.54225	1.7124
33	l	10	33_l_10	5.51423	1.70733
34	l	1	34_l_1	5.37515	1.68179
34	l	2	34_l_2	5.5232	1.70896
34	l	3	34_l_3	5.50606	1.70585
34	l	4	34_l_4	5.44608	1.6949
34	l	5	34_l_5	5.36202	1.67934
34	l	6	34_l_6	5.39611	1.68568
34	l	7	34_l_7	5.49545	1.70392
34	l	8	34_l_8	5.51356	1.70721
34	l	9	34_l_9	5.44818	1.69528
34	l	10	34_l_10	5.2885	1.66554
1	r	1	1_r_1	5.53839	1.7117
1	r	2	1_r_2	5.31644	1.6708
1	r	3	1_r_3	5.51562	1.70758
1	r	4	1_r_4	5.31761	1.67102
1	r	5	1_r_5	5.47581	1.70034
1	r	6	1_r_6	5.31877	1.67124
1	r	7	1_r_7	5.53004	1.7102
1	r	8	1_r_8	5.31108	1.66979
1	r	9	1_r_9	5.41547	1.68909
1	r	10	1_r_10	5.42201	1.69028
3	r	1	3_r_1	5.46588	1.69852
3	r	2	3_r_2	5.36169	1.67928
3	r	3	3_r_3	5.48388	1.70181
3	r	4	3_r_4	5.46586	1.69852
3	r	5	3_r_5	5.42969	1.69188
3	r	6	3_r_6	5.37161	1.68113
3	r	7	3_r_7	5.49854	1.70448
3	r	8	3_r_8	5.49804	1.70439
3	r	9	3_r_9	1080.11	6.98482
3	r	10	3_r_10	5.4469	1.695
7	r	1	7_r_1	1079.31	6.98408
7	r	2	7_r_2	1065.06	6.97079
7	r	3	7_r_3	1064.99	6.97073
7	r	4	7_r_4	1075.68	6.98071
7	r	5	7_r_5	6.87908	1.92849
7	r	6	7_r_6	6.77915	1.91385
7	r	7	7_r_7	6.78059	1.91406
7	r	8	7_r_8	6.85092	1.92438
7	r	9	7_r_9	6.88615	1.92951
7	r	10	7_r_10	6.83518	1.92206
9	r	1	9_r_1	1062.22	6.96812
9	r	2	9_r_2	1038.73	6.94576
9	r	3	9_r_3	1063.38	6.96921
9	r	4	9_r_4	1079.81	6.98454
9	r	5	9_r_5	1080.17	6.98487
9	r	6	9_r_6	6.71006	1.90361
9	r	7	9_r_7	6.61402	1.88919
9	r	8	9_r_8	6.77546	1.91331
9	r	9	9_r_9	6.74182	1.90833
9	r	10	9_r_10	6.87711	1.9282
10	r	1	10_r_1	5.61641	1.72569
10	r	2	10_r_2	5.58412	1.71993
10	r	3	10_r_3	5.53781	1.7116
10	r	4	10_r_4	5.5151	1.70749
10	r	5	10_r_5	5.40298	1.68695
10	r	6	10_r_6	5.61523	1.72548
10	r	7	10_r_7	5.57104	1.71758
10	r	8	10_r_8	5.56056	1.7157
10	r	9	10_r_9	5.46524	1.69841
10	r	10	10_r_10	5.39345	1.68519
11	r	1	11_r_1	5.51017	1.70659
11	r	2	11_r_2	5.35978	1.67892
11	r	3	11_r_3	5.32329	1.67209
11	r	4	11_r_4	5.33513	1.67431
11	r	5	11_r_5	5.42862	1.69169
11	r	6	11_r_6	5.50192	1.7051
11	r	7	11_r_7	5.35133	1.67735
11	r	8	11_r_8	5.35285	1.67763
11	r	9	11_r_9	5.32972	1.6733
11	r	10	11_r_10	5.42222	1.6905
13	r	1	13_r_1	5.57274	1.71789
13	r	2	13_r_2	5.56128	1.71583
13	r	3	13_r_3	5.46162	1.69775
13	r	4	13_r_4	5.34069	1.67535
13	r	5	13_r_5	5.35613	1.67824
13	r	6	13_r_6	5.56177	1.71592
13	r	7	13_r_7	5.43869	1.69354
13	r	8	13_r_8	5.56411	1.71634
13	r	9	13_r_9	5.34707	1.67655
13	r	10	13_r_10	5.35325	1.6777
16	r	1	16_r_1	5.56763	1.71697
16	r	2	16_r_2	5.65295	1.73218
16	r	3	16_r_3	5.49874	1.70452
16	r	4	16_r_4	5.37832	1.68238
16	r	5	16_r_5	5.5321	1.71057
16	r	6	16_r_6	5.54958	1.71372
16	r	7	16_r_7	5.64994	1.73164
16	r	8	16_r_8	5.50005	1.70476
16	r	9	16_r_9	5.38831	1.68423
16	r	10	16_r_10	5.55587	1.71486
17	r	1	17_r_1	5.38925	1.68441
17	r	2	17_r_2	5.2793	1.66379
17	r	3	17_r_3	5.0691	1.62316
17	r	4	17_r_4	5.51006	1.70657
17	r	5	17_r_5	5.54896	1.71361
17	r	6	17_r_6	5.39854	1.68613
17	r	7	17_r_7	5.29241	1.66627
17	r	8	17_r_8	5.06741	1.62283
17	r	9	17_r_9	5.46566	1.69848
17	r	10	17_r_10	5.53164	1.71048
18	r	1	18_r_1	5.55206	1.71417
18	r	2	18_r_2	5.47979	1.70107
18	r	3	18_r_3	5.53457	1.71101
18	r	4	18_r_4	5.25349	1.65889
18	r	5	18_r_5	5.58162	1.71948
18	r	6	18_r_6	5.5596	1.71553
18	r	7	18_r_7	5.51421	1.70733
18	r	8	18_r_8	5.5252	1.70932
18	r	9	18_r_9	5.24845	1.65793
18	r	10	18_r_10	5.57961	1.71912
19	r	1	19_r_1	5.59191	1.72132
19	r	2	19_r_2	5.56517	1.71653
19	r	3	19_r_3	5.71294	1.74273
19	r	4	19_r_4	5.4502	1.69565
19	r	5	19_r_5	5.5025	1.7052
19	r	6	19_r_6	5.59389	1.72167
19	r	7	19_r_7	5.55154	1.71407
19	r	8	19_r_8	5.71962	1.7439
19	r	9	19_r_9	5.43779	1.69337
19	r	10	19_r_10	5.5081	1.70622
21	r	1	21_r_1	5.37962	1.68262
21	r	2	21_r_2	5.44496	1.69469
21	r	3	21_r_3	5.58229	1.7196
21	r	4	21_r_4	5.50824	1.70624
21	r	5	21_r_5	5.46846	1.699
21	r	6	21_r_6	5.39363	1.68522
21	r	7	21_r_7	5.41877	1.68987
21	r	8	21_r_8	5.6112	1.72476
21	r	9	21_r_9	5.49742	1.70428
21	r	10	21_r_10	5.47217	1.69967
22	r	1	22_r_1	1071.65	6.97695
22	r	2	22_r_2	1026.24	6.93365
22	r	3	22_r_3	1004.76	6.9125
22	r	4	22_r_4	1014.97	6.92261
22	r	5	22_r_5	1032.96	6.94019
22	r	6	22_r_6	6.77118	1.91268
22	r	7	22_r_7	6.48109	1.86889
22	r	8	22_r_8	6.33754	1.84649
22	r	9	22_r_9	6.40566	1.85718
22	r	10	22_r_10	6.56976	1.88248
23	r	1	23_r_1	7.20748	1.97512
23	r	2	23_r_2	5.46363	1.69811
23	r	3	23_r_3	5.47937	1.70099
23	r	4	23_r_4	5.35673	1.67835
23	r	5	23_r_5	7.24052	1.97969
23	r	6	23_r_6	5.45619	1.69675
23	r	7	23_r_7	5.53735	1.71152
23	r	8	23_r_8	5.41302	1.68881
23	r	9	23_r_9	5.89429	1.76617
23	r	10	23_r_10	5.43324	1.69249
24	r	1	24_r_1	1045.22	6.95198
24	r	2	24_r_2	1063.54	6.96936
24	r	3	24_r_3	1040.77	6.94772
24	r	4	24_r_4	1060.51	6.96651
24	r	5	24_r_5	1078.15	6.983
24	r	6	24_r_6	6.61465	1.88929
24	r	7	24_r_7	6.71564	1.90444
24	r	8	24_r_8	6.56834	1.88226
24	r	9	24_r_9	6.64273	1.89352
24	r	10	24_r_10	6.75081	1.90966
26	r	1	26_r_1	5.36771	1.6804
26	r	2	26_r_2	5.45012	1.69564
26	r	3	26_r_3	5.19736	1.64815
26	r	4	26_r_4	5.39703	1.68585
26	r	5	26_r_5	5.31507	1.67055
26	r	6	26_r_6	5.41136	1.6885
26	r	7	26_r_7	5.47136	1.69953
26	r	8	26_r_8	5.23462	1.65529
26	r	9	26_r_9	5.40504	1.68733
26	r	10	26_r_10	5.27582	1.66313
27	r	1	27_r_1	5.51148	1.70683
27	r	2	27_r_2	5.45503	1.69654
27	r	3	27_r_3	5.33788	1.67483
27	r	4	27_r_4	5.47977	1.70106
27	r	5	27_r_5	5.4715	1.69955
27	r	6	27_r_6	5.51587	1.70763
27	r	7	27_r_7	5.4615	1.69772
27	r	8	27_r_8	5.35164	1.6774
27	r	9	27_r_9	5.51537	1.70754
27	r	10	27_r_10	5.46178	1.69777
28	r	1	28_r_1	5.53815	1.71166
28	r	2	28_r_2	5.61895	1.72615
28	r	3	28_r_3	5.53996	1.71199
28	r	4	28_r_4	5.76734	1.75221
28	r	5	28_r_5	5.62375	1.727
28	r	6	28_r_6	5.54368	1.71266
28	r	7	28_r_7	5.57748	1.71874
28	r	8	28_r_8	5.53498	1.71109
28	r	9	28_r_9	5.74684	1.74865
28	r	10	28_r_10	5.59639	1.72212
30	r	1	30_r_1	5.60799	1.72419
30	r	2	30_r_2	5.35679	1.67836
30	r	3	30_r_3	5.29761	1.66726
30	r	4	30_r_4	5.35711	1.67842
30	r	5	30_r_5	5.49504	1.70385
30	r	6	30_r_6	5.60947	1.72446
30	r	7	30_r_7	5.38062	1.6828
30	r	8	30_r_8	5.28898	1.66563
30	r	9	30_r_9	5.36339	1.6796
30	r	10	30_r_10	5.49178	1.70325
31	r	1	31_r_1	1093.35	6.997
31	r	2	31_r_2	1051.15	6.95764
31	r	3	31_r_3	1064.4	6.97016
31	r	4	31_r_4	1025.47	6.93291
31	r	5	31_r_5	1039.47	6.94647
31	r	6	31_r_6	1054.77	6.96084
31	r	7	31_r_7	1054.77	6.96084
31	r	8	31_r_8	1057.77	6.9639
31	r	9	31_r_9	1078.87	6.98358
31	r	10	31_r_10	1032.47	6.93969
32	r	1	32_r_1	5.61635	1.72568
32	r	2	32_r_2	5.58591	1.72025
32	r	3	32_r_3	5.58418	1.71994
32	r	4	32_r_4	5.60139	1.72301
32	r	5	32_r_5	5.5948	1.72184
32	r	6	32_r_6	5.59229	1.72139
32	r	7	32_r_7	5.56907	1.71723
32	r	8	32_r_8	5.55023	1.71384
32	r	9	32_r_9	5.60478	1.72362
32	r	10	32_r_10	5.61813	1.726
33	r	1	33_r_1	5.50346	1.70538
33	r	2	33_r_2	5.5349	1.71107
33	r	3	33_r_3	5.533	1.71073
33	r	4	33_r_4	5.59514	1.7219
33	r	5	33_r_5	5.55148	1.71406
33	r	6	33_r_6	5.49688	1.70418
33	r	7	33_r_7	5.53345	1.71081
33	r	8	33_r_8	5.48663	1.70231
33	r	9	33_r_9	5.59441	1.72177
33	r	10	33_r_10	5.52093	1.70855
34	r	1	34_r_1	5.37191	1.68118
34	r	2	34_r_2	5.50736	1.70608
34	r	3	34_r_3	5.51808	1.70803
34	r	4	34_r_4	5.40751	1.68779
34	r	5	34_r_5	5.4184	1.6898
34	r	6	34_r_6	5.39957	1.68632
34	r	7	34_r_7	5.50923	1.70642
34	r	8	34_r_8	5.51668	1.70778
34	r	9	34_r_9	5.39863	1.68614
34	r	10	34_r_10	5.41314	1.68883
